# Supplementary material for: RNA-binding deficient TDP-43 drives cognitive decline in a mouse model of TDP-43 proteinopathy
Source: eLife. 2023 Oct 11;12:RP85921. doi: 10.7554/eLife.85921 (PMC10567115; doi:10.7554/eLife.85921)
Supplement: Figure 4—figure supplement 1—source data 1. [file elife-85921-fig4-figsupp1-data1.xlsx]

## Sheet: F4_FS1a-Left
Table Analyzed	12	18mo WT	Het	KQ male
Two-way ANOVA	Ordinary
Alpha	0.05
Source of Variation	% of total variation	P value	P value summary	Significant?
Age	0.2108	0.693	ns	No
Genotype	20.88	0.001	***	Yes
ANOVA table	SS (Type III)	DF	MS	F (DFn	DFd)	P value
Age	12.38	1	12.38	F (1	59) = 0.1573	P=0.6930
Genotype	1227	2	613.4	F (2	59) = 7.794	P=0.0010
Residual	4643	59	78.69
Difference between row means
Predicted (LS) mean of 12	42.5
Predicted (LS) mean of 18	43.38
Difference between predicted means	-0.8884
SE of difference	2.24
95% CI of difference	-5.370 to 3.593
Data summary
Number of columns (Genotype)	3
Number of rows (Age)	2
Number of values	63
Multiple Comparisons Testing:
Compare cell means regardless of rows and columns
Number of families	1
Number of comparisons per family	15
Alpha	0.05
Tukey's multiple comparisons test	Predicted (LS) mean diff.	95.00% CI of diff.	Below threshold?	Summary	Adjusted P Value
12:TDP-43wt vs. 12:TDP-43wt/KQ	-3.098	-11.12 to 4.927	No	ns	0.8639
12:TDP-43wt vs. 12:TDP-43KQ/KQ	7.357	-1.015 to 15.73	No	ns	0.1164
12:TDP-43wt vs. 18:TDP-43wt	-0.8884	-7.485 to 5.709	No	ns	0.9987
12:TDP-43wt vs. 18:TDP-43wt/KQ	-3.987	-14.49 to 6.512	No	ns	0.8718
12:TDP-43wt vs. 18:TDP-43KQ/KQ	6.468	-4.094 to 17.03	No	ns	0.4713
12:TDP-43wt/KQ vs. 12:TDP-43KQ/KQ	10.45	2.537 to 18.37	Yes	**	0.0034
12:TDP-43wt/KQ vs. 18:TDP-43wt	2.21	-8.068 to 12.49	No	ns	0.988
12:TDP-43wt/KQ vs. 18:TDP-43wt/KQ	-0.8884	-7.485 to 5.709	No	ns	0.9987
12:TDP-43wt/KQ vs. 18:TDP-43KQ/KQ	9.566	-0.5260 to 19.66	No	ns	0.0729
12:TDP-43KQ/KQ vs. 18:TDP-43wt	-8.245	-19.00 to 2.510	No	ns	0.2278
12:TDP-43KQ/KQ vs. 18:TDP-43wt/KQ	-11.34	-21.86 to -0.8284	Yes	*	0.0273
12:TDP-43KQ/KQ vs. 18:TDP-43KQ/KQ	-0.8884	-7.485 to 5.709	No	ns	0.9987
18:TDP-43wt vs. 18:TDP-43wt/KQ	-3.098	-11.12 to 4.927	No	ns	0.8639
18:TDP-43wt vs. 18:TDP-43KQ/KQ	7.357	-1.015 to 15.73	No	ns	0.1164
18:TDP-43wt/KQ vs. 18:TDP-43KQ/KQ	10.45	2.537 to 18.37	Yes	**	0.0034
Test details	Predicted (LS) mean 1	Predicted (LS) mean 2	Predicted (LS) mean diff.	SE of diff.	N1	N2	q	DF
12:TDP-43wt vs. 12:TDP-43wt/KQ	43.92	47.01	-3.098	2.725	9	12	1.608	59
12:TDP-43wt vs. 12:TDP-43KQ/KQ	43.92	36.56	7.357	2.842	9	9	3.66	59
12:TDP-43wt vs. 18:TDP-43wt	43.92	44.8	-0.8884	2.24	9	10	0.561	59
12:TDP-43wt vs. 18:TDP-43wt/KQ	43.92	47.9	-3.987	3.564	9	12	1.582	59
12:TDP-43wt vs. 18:TDP-43KQ/KQ	43.92	37.45	6.468	3.586	9	11	2.551	59
12:TDP-43wt/KQ vs. 12:TDP-43KQ/KQ	47.01	36.56	10.45	2.688	12	9	5.5	59
12:TDP-43wt/KQ vs. 18:TDP-43wt	47.01	44.8	2.21	3.49	12	10	0.8956	59
12:TDP-43wt/KQ vs. 18:TDP-43wt/KQ	47.01	47.9	-0.8884	2.24	12	12	0.561	59
12:TDP-43wt/KQ vs. 18:TDP-43KQ/KQ	47.01	37.45	9.566	3.427	12	11	3.948	59
12:TDP-43KQ/KQ vs. 18:TDP-43wt	36.56	44.8	-8.245	3.651	9	10	3.193	59
12:TDP-43KQ/KQ vs. 18:TDP-43wt/KQ	36.56	47.9	-11.34	3.57	9	12	4.494	59
12:TDP-43KQ/KQ vs. 18:TDP-43KQ/KQ	36.56	37.45	-0.8884	2.24	9	11	0.561	59
18:TDP-43wt vs. 18:TDP-43wt/KQ	44.8	47.9	-3.098	2.725	10	12	1.608	59
18:TDP-43wt vs. 18:TDP-43KQ/KQ	44.8	37.45	7.357	2.842	10	11	3.66	59
18:TDP-43wt/KQ vs. 18:TDP-43KQ/KQ	47.9	37.45	10.45	2.688	12	11	5.5	59

## Sheet: F4_FS1a-Right
Table Analyzed	12	18mo WT	Het	KQ female
Two-way ANOVA	Ordinary
Alpha	0.05
Source of Variation	% of total variation	P value	P value summary	Significant?
Age	10.67	0.0056	**	Yes
Genotype	22.24	0.0006	***	Yes
ANOVA table	SS (Type III)	DF	MS	F (DFn	DFd)	P value
Age	439.2	1	439.2	F (1	49) = 8.392	P=0.0056
Genotype	915.3	2	457.7	F (2	49) = 8.744	P=0.0006
Residual	2565	49	52.34
Difference between row means
Predicted (LS) mean of 12	34.84
Predicted (LS) mean of 18	40.83
Difference between predicted means	-5.984
SE of difference	2.066
95% CI of difference	-10.13 to -1.833
Data summary
Number of columns (Genotype)	3
Number of rows (Age)	2
Number of values	53
Multiple Comparisons Testing:
Compare cell means regardless of rows and columns
Number of families	1
Number of comparisons per family	15
Alpha	0.05
Tukey's multiple comparisons test	Predicted (LS) mean diff.	95.00% CI of diff.	Below threshold?	Summary	Adjusted P Value
12:TDP-43wt vs. 12:TDP-43wt/KQ	-0.7461	-8.067 to 6.575	No	ns	0.9996
12:TDP-43wt vs. 12:TDP-43KQ/KQ	8.743	1.543 to 15.94	Yes	**	0.0091
12:TDP-43wt vs. 18:TDP-43wt	-5.984	-12.11 to 0.1417	No	ns	0.0591
12:TDP-43wt vs. 18:TDP-43wt/KQ	-6.73	-14.99 to 1.526	No	ns	0.1705
12:TDP-43wt vs. 18:TDP-43KQ/KQ	2.759	-6.543 to 12.06	No	ns	0.9496
12:TDP-43wt/KQ vs. 12:TDP-43KQ/KQ	9.489	1.838 to 17.14	Yes	**	0.0073
12:TDP-43wt/KQ vs. 18:TDP-43wt	-5.238	-15.92 to 5.443	No	ns	0.6942
12:TDP-43wt/KQ vs. 18:TDP-43wt/KQ	-5.984	-12.11 to 0.1417	No	ns	0.0591
12:TDP-43wt/KQ vs. 18:TDP-43KQ/KQ	3.505	-7.275 to 14.29	No	ns	0.9269
12:TDP-43KQ/KQ vs. 18:TDP-43wt	-14.73	-24.33 to -5.126	Yes	***	0.0005
12:TDP-43KQ/KQ vs. 18:TDP-43wt/KQ	-15.47	-24.19 to -6.759	Yes	****	<0.0001
12:TDP-43KQ/KQ vs. 18:TDP-43KQ/KQ	-5.984	-12.11 to 0.1417	No	ns	0.0591
18:TDP-43wt vs. 18:TDP-43wt/KQ	-0.7461	-8.067 to 6.575	No	ns	0.9996
18:TDP-43wt vs. 18:TDP-43KQ/KQ	8.743	1.543 to 15.94	Yes	**	0.0091
18:TDP-43wt/KQ vs. 18:TDP-43KQ/KQ	9.489	1.838 to 17.14	Yes	**	0.0073
Test details	Predicted (LS) mean 1	Predicted (LS) mean 2	Predicted (LS) mean diff.	SE of diff.	N1	N2	q	DF
12:TDP-43wt vs. 12:TDP-43wt/KQ	37.51	38.26	-0.7461	2.469	12	5	0.4274	49
12:TDP-43wt vs. 12:TDP-43KQ/KQ	37.51	28.77	8.743	2.428	12	9	5.093	49
12:TDP-43wt vs. 18:TDP-43wt	37.51	43.49	-5.984	2.066	12	8	4.097	49
12:TDP-43wt vs. 18:TDP-43wt/KQ	37.51	44.24	-6.73	2.784	12	12	3.418	49
12:TDP-43wt vs. 18:TDP-43KQ/KQ	37.51	34.75	2.759	3.137	12	7	1.244	49
12:TDP-43wt/KQ vs. 12:TDP-43KQ/KQ	38.26	28.77	9.489	2.58	5	9	5.201	49
12:TDP-43wt/KQ vs. 18:TDP-43wt	38.26	43.49	-5.238	3.602	5	8	2.057	49
12:TDP-43wt/KQ vs. 18:TDP-43wt/KQ	38.26	44.24	-5.984	2.066	5	12	4.097	49
12:TDP-43wt/KQ vs. 18:TDP-43KQ/KQ	38.26	34.75	3.505	3.635	5	7	1.364	49
12:TDP-43KQ/KQ vs. 18:TDP-43wt	28.77	43.49	-14.73	3.237	9	8	6.433	49
12:TDP-43KQ/KQ vs. 18:TDP-43wt/KQ	28.77	44.24	-15.47	2.938	9	12	7.447	49
12:TDP-43KQ/KQ vs. 18:TDP-43KQ/KQ	28.77	34.75	-5.984	2.066	9	7	4.097	49
18:TDP-43wt vs. 18:TDP-43wt/KQ	43.49	44.24	-0.7461	2.469	8	12	0.4274	49
18:TDP-43wt vs. 18:TDP-43KQ/KQ	43.49	34.75	8.743	2.428	8	7	5.093	49
18:TDP-43wt/KQ vs. 18:TDP-43KQ/KQ	44.24	34.75	9.489	2.58	12	7	5.201	49

## Sheet: F4_FS1b-Left
Table Analyzed	12mo Open Field- center time
Two-way RM ANOVA	Matching: Stacked
Assume sphericity?	No
Alpha	0.05
Source of Variation	% of total variation	P value	P value summary	Significant?	Geisser-Greenhouse's epsilon
Time point x Genotype	1.57	0.5589	ns	No
Time point	5.99	<0.0001	****	Yes	0.6032
Genotype	10.39	0.0964	ns	No
Animal ID	57.11	<0.0001	****	Yes
ANOVA table	SS	DF	MS	F (DFn	DFd)	P value
Time point x Genotype	6372	22	289.6	F (22	308) = 0.9272	P=0.5589
Time point	24305	11	2210	F (6.635	185.8) = 7.074	P<0.0001
Genotype	42144	2	21072	F (2	28) = 2.546	P=0.0964
Animal ID	231739	28	8276	F (28	308) = 26.50	P<0.0001
Residual	96208	308	312.4
Data summary
Number of columns (Genotype)	3
Number of rows (Time point)	12
Number of subjects (Animal ID)	31
Number of missing values	0
Multiple Comparisons Testing:
Within each row	compare columns (simple effects within rows)
Number of families	12
Number of comparisons per family	3
Alpha	0.05
Tukey's multiple comparisons test	Mean Diff.	95.00% CI of diff.	Below threshold?	Summary	Adjusted P Value
5
TDP-43wt vs. TDP-43wt/KQ	-3.578	-43.78 to 36.62	No	ns	0.9691
TDP-43wt vs. TDP-43KQ/KQ	-15.37	-62.50 to 31.77	No	ns	0.638
TDP-43wt/KQ vs. TDP-43KQ/KQ	-11.79	-65.79 to 42.21	No	ns	0.8351
10
TDP-43wt vs. TDP-43wt/KQ	-9.567	-48.81 to 29.67	No	ns	0.781
TDP-43wt vs. TDP-43KQ/KQ	-26.97	-73.08 to 19.13	No	ns	0.2589
TDP-43wt/KQ vs. TDP-43KQ/KQ	-17.4	-70.92 to 36.11	No	ns	0.6754
15
TDP-43wt vs. TDP-43wt/KQ	2.973	-28.99 to 34.93	No	ns	0.9677
TDP-43wt vs. TDP-43KQ/KQ	-15.65	-59.52 to 28.23	No	ns	0.5908
TDP-43wt/KQ vs. TDP-43KQ/KQ	-18.62	-65.88 to 28.64	No	ns	0.5589
20
TDP-43wt vs. TDP-43wt/KQ	-0.6489	-36.25 to 34.95	No	ns	0.9987
TDP-43wt vs. TDP-43KQ/KQ	-21.66	-75.40 to 32.08	No	ns	0.5062
TDP-43wt/KQ vs. TDP-43KQ/KQ	-21.01	-78.09 to 36.07	No	ns	0.5956
25
TDP-43wt vs. TDP-43wt/KQ	-16.35	-42.23 to 9.532	No	ns	0.2594
TDP-43wt vs. TDP-43KQ/KQ	-30.03	-64.34 to 4.280	No	ns	0.086
TDP-43wt/KQ vs. TDP-43KQ/KQ	-13.68	-50.56 to 23.20	No	ns	0.5963
30
TDP-43wt vs. TDP-43wt/KQ	0.04222	-32.07 to 32.16	No	ns	>0.9999
TDP-43wt vs. TDP-43KQ/KQ	-34.41	-104.3 to 35.51	No	ns	0.3652
TDP-43wt/KQ vs. TDP-43KQ/KQ	-34.46	-105.4 to 36.53	No	ns	0.3985
35
TDP-43wt vs. TDP-43wt/KQ	-6.144	-39.24 to 26.95	No	ns	0.8684
TDP-43wt vs. TDP-43KQ/KQ	-33.25	-88.90 to 22.40	No	ns	0.2454
TDP-43wt/KQ vs. TDP-43KQ/KQ	-27.1	-85.51 to 31.31	No	ns	0.4446
40
TDP-43wt vs. TDP-43wt/KQ	-3.613	-28.74 to 21.52	No	ns	0.9261
TDP-43wt vs. TDP-43KQ/KQ	-15.65	-66.35 to 35.05	No	ns	0.656
TDP-43wt/KQ vs. TDP-43KQ/KQ	-12.04	-63.62 to 39.54	No	ns	0.795
45
TDP-43wt vs. TDP-43wt/KQ	-10.91	-44.85 to 23.03	No	ns	0.6721
TDP-43wt vs. TDP-43KQ/KQ	-26.51	-61.94 to 8.912	No	ns	0.1453
TDP-43wt/KQ vs. TDP-43KQ/KQ	-15.6	-58.19 to 26.98	No	ns	0.6124
50
TDP-43wt vs. TDP-43wt/KQ	-11.22	-53.42 to 30.98	No	ns	0.7536
TDP-43wt vs. TDP-43KQ/KQ	-45.32	-112.3 to 21.63	No	ns	0.1817
TDP-43wt/KQ vs. TDP-43KQ/KQ	-34.1	-105.1 to 36.90	No	ns	0.4246
55
TDP-43wt vs. TDP-43wt/KQ	-4.967	-32.96 to 23.03	No	ns	0.8903
TDP-43wt vs. TDP-43KQ/KQ	-33.02	-87.51 to 21.47	No	ns	0.2465
TDP-43wt/KQ vs. TDP-43KQ/KQ	-28.06	-83.62 to 27.50	No	ns	0.3765
60
TDP-43wt vs. TDP-43wt/KQ	-14.53	-51.25 to 22.20	No	ns	0.542
TDP-43wt vs. TDP-43KQ/KQ	-26.43	-73.55 to 20.69	No	ns	0.2862
TDP-43wt/KQ vs. TDP-43KQ/KQ	-11.9	-64.77 to 40.97	No	ns	0.8244
Test details	Mean 1	Mean 2	Mean Diff.	SE of diff.	N1	N2	q	DF
5
TDP-43wt vs. TDP-43wt/KQ	42.03	45.61	-3.578	14.97	15	9	0.3379	11.46
TDP-43wt vs. TDP-43KQ/KQ	42.03	57.4	-15.37	16.53	15	7	1.314	8.085
TDP-43wt/KQ vs. TDP-43KQ/KQ	45.61	57.4	-11.79	20.47	9	7	0.8145	13.09
10
TDP-43wt vs. TDP-43wt/KQ	39.5	49.07	-9.567	14.09	15	9	0.9604	9.114
TDP-43wt vs. TDP-43KQ/KQ	39.5	66.47	-26.97	15.48	15	7	2.465	6.686
TDP-43wt/KQ vs. TDP-43KQ/KQ	49.07	66.47	-17.4	20.31	9	7	1.212	13.21
15
TDP-43wt vs. TDP-43wt/KQ	44.04	41.07	2.973	12.17	15	9	0.3456	13.59
TDP-43wt vs. TDP-43KQ/KQ	44.04	59.69	-15.65	15.49	15	7	1.428	8.357
TDP-43wt/KQ vs. TDP-43KQ/KQ	41.07	59.69	-18.62	17.66	9	7	1.491	11.71
20
TDP-43wt vs. TDP-43wt/KQ	37.94	38.59	-0.6489	13.42	15	9	0.06836	12.56
TDP-43wt vs. TDP-43KQ/KQ	37.94	59.6	-21.66	18.6	15	7	1.647	7.594
TDP-43wt/KQ vs. TDP-43KQ/KQ	38.59	59.6	-21.01	21.14	9	7	1.405	11.03
25
TDP-43wt vs. TDP-43wt/KQ	19.83	36.18	-16.35	9.956	15	9	2.323	14.88
TDP-43wt vs. TDP-43KQ/KQ	19.83	49.86	-30.03	12.31	15	7	3.449	9.1
TDP-43wt/KQ vs. TDP-43KQ/KQ	36.18	49.86	-13.68	13.8	9	7	1.401	11.88
30
TDP-43wt vs. TDP-43wt/KQ	30.99	30.94	0.04222	12.12	15	9	0.004926	12.65
TDP-43wt vs. TDP-43KQ/KQ	30.99	65.4	-34.41	23.54	15	7	2.067	6.765
TDP-43wt/KQ vs. TDP-43KQ/KQ	30.94	65.4	-34.46	25.21	9	7	1.933	8.606
35
TDP-43wt vs. TDP-43wt/KQ	21.57	27.71	-6.144	12.06	15	9	0.7208	9.914
TDP-43wt vs. TDP-43KQ/KQ	21.57	54.81	-33.25	18.59	15	7	2.529	6.562
TDP-43wt/KQ vs. TDP-43KQ/KQ	27.71	54.81	-27.1	21.46	9	7	1.786	10.44
40
TDP-43wt vs. TDP-43wt/KQ	22.02	25.63	-3.613	9.659	15	9	0.529	14.78
TDP-43wt vs. TDP-43KQ/KQ	22.02	37.67	-15.65	17.37	15	7	1.275	7.258
TDP-43wt/KQ vs. TDP-43KQ/KQ	25.63	37.67	-12.04	18.41	9	7	0.9248	8.829
45
TDP-43wt vs. TDP-43wt/KQ	19.16	30.07	-10.91	12.61	15	9	1.223	11.28
TDP-43wt vs. TDP-43KQ/KQ	19.16	45.67	-26.51	12.56	15	7	2.985	8.53
TDP-43wt/KQ vs. TDP-43KQ/KQ	30.07	45.67	-15.6	16.24	9	7	1.359	13.73
50
TDP-43wt vs. TDP-43wt/KQ	19.87	31.09	-11.22	15.44	15	9	1.028	10.18
TDP-43wt vs. TDP-43KQ/KQ	19.87	65.19	-45.32	22.5	15	7	2.848	6.718
TDP-43wt/KQ vs. TDP-43KQ/KQ	31.09	65.19	-34.1	26.24	9	7	1.838	10.86
55
TDP-43wt vs. TDP-43wt/KQ	15.53	20.5	-4.967	10.77	15	9	0.652	14.93
TDP-43wt vs. TDP-43KQ/KQ	15.53	48.56	-33.02	18.74	15	7	2.493	7.382
TDP-43wt/KQ vs. TDP-43KQ/KQ	20.5	48.56	-28.06	19.91	9	7	1.993	9.016
60
TDP-43wt vs. TDP-43wt/KQ	12.26	26.79	-14.53	13.34	15	9	1.541	9.729
TDP-43wt vs. TDP-43KQ/KQ	12.26	38.69	-26.43	15.93	15	7	2.346	6.882
TDP-43wt/KQ vs. TDP-43KQ/KQ	26.79	38.69	-11.9	19.94	9	7	0.8439	12.57

## Sheet: F4_FS1b-Right
Table Analyzed	18mo Open Field- center time
Two-way RM ANOVA	Matching: Stacked
Assume sphericity?	No
Alpha	0.05
Source of Variation	% of total variation	P value	P value summary	Significant?	Geisser-Greenhouse's epsilon
Time point x Genotype	2.526	0.5369	ns	No
Time point	21.62	<0.0001	****	Yes	0.3701
Genotype	5.675	0.0329	*	Yes
Animal ID	24.69	<0.0001	****	Yes
ANOVA table	SS	DF	MS	F (DFn	DFd)	P value
Time point x Genotype	4909	22	223.1	F (22	363) = 0.9437	P=0.5369
Time point	42024	11	3820	F (4.071	134.4) = 16.16	P<0.0001
Genotype	11031	2	5515	F (2	33) = 3.793	P=0.0329
Animal ID	47988	33	1454	F (33	363) = 6.150	P<0.0001
Residual	85834	363	236.5
Data summary
Number of columns (Genotype)	3
Number of rows (Time point)	12
Number of subjects (Animal ID)	36
Number of missing values	0
Multiple Comparisons Testing:
Within each row	compare columns (simple effects within rows)
Number of families	12
Number of comparisons per family	3
Alpha	0.05
Tukey's multiple comparisons test	Mean Diff.	95.00% CI of diff.	Below threshold?	Summary	Adjusted P Value
5
TDP-43wt vs. TDP-43wt/KQ	-18.81	-48.49 to 10.87	No	ns	0.2732
TDP-43wt vs. TDP-43KQ/KQ	-28.51	-56.71 to -0.3135	Yes	*	0.0473
TDP-43wt/KQ vs. TDP-43KQ/KQ	-9.699	-41.26 to 21.86	No	ns	0.7249
10
TDP-43wt vs. TDP-43wt/KQ	-10.49	-32.61 to 11.63	No	ns	0.4655
TDP-43wt vs. TDP-43KQ/KQ	-20.29	-51.84 to 11.27	No	ns	0.2475
TDP-43wt/KQ vs. TDP-43KQ/KQ	-9.797	-39.72 to 20.13	No	ns	0.6701
15
TDP-43wt vs. TDP-43wt/KQ	-14.45	-29.96 to 1.062	No	ns	0.0712
TDP-43wt vs. TDP-43KQ/KQ	-28.64	-64.01 to 6.736	No	ns	0.1158
TDP-43wt/KQ vs. TDP-43KQ/KQ	-14.19	-49.60 to 21.22	No	ns	0.5383
20
TDP-43wt vs. TDP-43wt/KQ	-13.01	-25.73 to -0.2832	Yes	*	0.0445
TDP-43wt vs. TDP-43KQ/KQ	-11.56	-28.58 to 5.472	No	ns	0.2132
TDP-43wt/KQ vs. TDP-43KQ/KQ	1.45	-15.55 to 18.45	No	ns	0.9734
25
TDP-43wt vs. TDP-43wt/KQ	-12.4	-32.45 to 7.642	No	ns	0.2893
TDP-43wt vs. TDP-43KQ/KQ	-5.612	-22.54 to 11.31	No	ns	0.6772
TDP-43wt/KQ vs. TDP-43KQ/KQ	6.79	-13.57 to 27.15	No	ns	0.6868
30
TDP-43wt vs. TDP-43wt/KQ	-6.725	-21.24 to 7.793	No	ns	0.4905
TDP-43wt vs. TDP-43KQ/KQ	-7.638	-22.23 to 6.958	No	ns	0.3908
TDP-43wt/KQ vs. TDP-43KQ/KQ	-0.9131	-16.29 to 14.46	No	ns	0.9878
35
TDP-43wt vs. TDP-43wt/KQ	-8.965	-20.47 to 2.537	No	ns	0.1473
TDP-43wt vs. TDP-43KQ/KQ	-4.163	-25.01 to 16.68	No	ns	0.8546
TDP-43wt/KQ vs. TDP-43KQ/KQ	4.802	-16.04 to 25.65	No	ns	0.8136
40
TDP-43wt vs. TDP-43wt/KQ	-11.84	-24.31 to 0.6226	No	ns	0.0643
TDP-43wt vs. TDP-43KQ/KQ	-15.53	-38.07 to 7.006	No	ns	0.1853
TDP-43wt/KQ vs. TDP-43KQ/KQ	-3.688	-27.66 to 20.28	No	ns	0.9148
45
TDP-43wt vs. TDP-43wt/KQ	-5.525	-13.21 to 2.163	No	ns	0.1891
TDP-43wt vs. TDP-43KQ/KQ	-12.14	-21.75 to -2.527	Yes	*	0.0156
TDP-43wt/KQ vs. TDP-43KQ/KQ	-6.613	-17.74 to 4.511	No	ns	0.3086
50
TDP-43wt vs. TDP-43wt/KQ	-5.917	-14.54 to 2.705	No	ns	0.2153
TDP-43wt vs. TDP-43KQ/KQ	-7.592	-17.85 to 2.663	No	ns	0.153
TDP-43wt/KQ vs. TDP-43KQ/KQ	-1.675	-13.85 to 10.50	No	ns	0.9355
55
TDP-43wt vs. TDP-43wt/KQ	-4.36	-10.17 to 1.446	No	ns	0.1618
TDP-43wt vs. TDP-43KQ/KQ	-6.327	-14.28 to 1.626	No	ns	0.119
TDP-43wt/KQ vs. TDP-43KQ/KQ	-1.967	-11.05 to 7.119	No	ns	0.8464
60
TDP-43wt vs. TDP-43wt/KQ	-8.079	-19.48 to 3.325	No	ns	0.1937
TDP-43wt vs. TDP-43KQ/KQ	-5.709	-11.47 to 0.04735	No	ns	0.0519
TDP-43wt/KQ vs. TDP-43KQ/KQ	2.37	-9.724 to 14.46	No	ns	0.8753
Test details	Mean 1	Mean 2	Mean Diff.	SE of diff.	N1	N2	q	DF
5
TDP-43wt vs. TDP-43wt/KQ	18.4	37.21	-18.81	11.92	10	17	2.233	25
TDP-43wt vs. TDP-43KQ/KQ	18.4	46.91	-28.51	10.95	10	9	3.682	16.35
TDP-43wt/KQ vs. TDP-43KQ/KQ	37.21	46.91	-9.699	12.6	17	9	1.089	23.02
10
TDP-43wt vs. TDP-43wt/KQ	20.37	30.86	-10.49	8.716	10	17	1.702	19.22
TDP-43wt vs. TDP-43KQ/KQ	20.37	40.66	-20.29	12.11	10	9	2.37	14.52
TDP-43wt/KQ vs. TDP-43KQ/KQ	30.86	40.66	-9.797	11.31	17	9	1.225	12.75
15
TDP-43wt vs. TDP-43wt/KQ	16.84	31.29	-14.45	6.204	10	17	3.293	23.6
TDP-43wt vs. TDP-43KQ/KQ	16.84	45.48	-28.64	12.9	10	9	3.14	9.971
TDP-43wt/KQ vs. TDP-43KQ/KQ	31.29	45.48	-14.19	12.97	17	9	1.548	10.23
20
TDP-43wt vs. TDP-43wt/KQ	12	25.01	-13.01	5.085	10	17	3.617	23.34
TDP-43wt vs. TDP-43KQ/KQ	12	23.56	-11.56	6.505	10	9	2.512	14
TDP-43wt/KQ vs. TDP-43KQ/KQ	25.01	23.56	1.45	6.553	17	9	0.313	15.21
25
TDP-43wt vs. TDP-43wt/KQ	13.41	25.81	-12.4	8.044	10	17	2.18	24.84
TDP-43wt vs. TDP-43KQ/KQ	13.41	19.02	-5.612	6.592	10	9	1.204	16.83
TDP-43wt/KQ vs. TDP-43KQ/KQ	25.81	19.02	6.79	8.154	17	9	1.178	23.99
30
TDP-43wt vs. TDP-43wt/KQ	11.14	17.86	-6.725	5.822	10	17	1.633	24.58
TDP-43wt vs. TDP-43KQ/KQ	11.14	18.78	-7.638	5.674	10	9	1.904	16.52
TDP-43wt/KQ vs. TDP-43KQ/KQ	17.86	18.78	-0.9131	6.12	17	9	0.211	21.95
35
TDP-43wt vs. TDP-43wt/KQ	6.97	15.94	-8.965	4.598	10	17	2.758	23.36
TDP-43wt vs. TDP-43KQ/KQ	6.97	11.13	-4.163	7.742	10	9	0.7605	11.24
TDP-43wt/KQ vs. TDP-43KQ/KQ	15.94	11.13	4.802	7.776	17	9	0.8733	11.6
40
TDP-43wt vs. TDP-43wt/KQ	2.37	14.21	-11.84	4.908	10	17	3.412	19.06
TDP-43wt vs. TDP-43KQ/KQ	2.37	17.9	-15.53	7.998	10	9	2.746	8.574
TDP-43wt/KQ vs. TDP-43KQ/KQ	14.21	17.9	-3.688	9.144	17	9	0.5704	13.8
45
TDP-43wt vs. TDP-43wt/KQ	1.24	6.765	-5.525	3.037	10	17	2.572	19.9
TDP-43wt vs. TDP-43KQ/KQ	1.24	13.38	-12.14	3.48	10	9	4.933	9.56
TDP-43wt/KQ vs. TDP-43KQ/KQ	6.765	13.38	-6.613	4.379	17	9	2.136	19
50
TDP-43wt vs. TDP-43wt/KQ	2.13	8.047	-5.917	3.392	10	17	2.467	18.89
TDP-43wt vs. TDP-43KQ/KQ	2.13	9.722	-7.592	3.693	10	9	2.908	9.269
TDP-43wt/KQ vs. TDP-43KQ/KQ	8.047	9.722	-1.675	4.81	17	9	0.4925	19.94
55
TDP-43wt vs. TDP-43wt/KQ	0.54	4.9	-4.36	2.265	10	17	2.722	17.17
TDP-43wt vs. TDP-43KQ/KQ	0.54	6.867	-6.327	2.81	10	9	3.184	8.383
TDP-43wt/KQ vs. TDP-43KQ/KQ	4.9	6.867	-1.967	3.558	17	9	0.7817	17.88
60
TDP-43wt vs. TDP-43wt/KQ	0.98	9.059	-8.079	4.443	10	17	2.571	16.91
TDP-43wt vs. TDP-43KQ/KQ	0.98	6.689	-5.709	2.108	10	9	3.83	10.25
TDP-43wt/KQ vs. TDP-43KQ/KQ	9.059	6.689	2.37	4.804	17	9	0.6976	21.39

## Sheet: F4_FS1c-Left
Table Analyzed	12mo Fear- context
Two-way RM ANOVA	Matching: Stacked
Assume sphericity?	No
Alpha	0.05
Source of Variation	% of total variation	P value	P value summary	Significant?	Geisser-Greenhouse's epsilon
Time point x Genotype	1.214	0.7019	ns	No
Time point	3.154	0.0157	*	Yes	0.7874
Genotype	6.56	0.255	ns	No
Animal ID	63.98	<0.0001	****	Yes
ANOVA table	SS	DF	MS	F (DFn	DFd)	P value
Time point x Genotype	1315	8	164.4	F (8	112) = 0.6874	P=0.7019
Time point	3417	4	854.3	F (3.150	88.19) = 3.571	P=0.0157
Genotype	7107	2	3553	F (2	28) = 1.435	P=0.2550
Animal ID	69316	28	2476	F (28	112) = 10.35	P<0.0001
Residual	26792	112	239.2
Data summary
Number of columns (Genotype)	3
Number of rows (Time point)	5
Number of subjects (Animal ID)	31
Number of missing values	0
Multiple Comparisons Testing:
Within each row	compare columns (simple effects within rows)
Number of families	5
Number of comparisons per family	3
Alpha	0.05
Tukey's multiple comparisons test	Mean Diff.	95.00% CI of diff.	Below threshold?	Summary	Adjusted P Value
1
TDP-43wt vs. TDP-43wt/KQ	-19.61	-42.41 to 3.190	No	ns	0.0999
TDP-43wt vs. TDP-43KQ/KQ	9.06	-19.14 to 37.27	No	ns	0.6779
TDP-43wt/KQ vs. TDP-43KQ/KQ	28.67	-0.2435 to 57.58	No	ns	0.052
2
TDP-43wt vs. TDP-43wt/KQ	-12.76	-37.97 to 12.45	No	ns	0.4252
TDP-43wt vs. TDP-43KQ/KQ	3.306	-29.93 to 36.54	No	ns	0.963
TDP-43wt/KQ vs. TDP-43KQ/KQ	16.07	-16.19 to 48.32	No	ns	0.3984
3
TDP-43wt vs. TDP-43wt/KQ	-5.224	-34.45 to 24.00	No	ns	0.8918
TDP-43wt vs. TDP-43KQ/KQ	7.881	-24.19 to 39.95	No	ns	0.795
TDP-43wt/KQ vs. TDP-43KQ/KQ	13.11	-21.69 to 47.90	No	ns	0.5942
4
TDP-43wt vs. TDP-43wt/KQ	-3.709	-32.55 to 25.13	No	ns	0.9416
TDP-43wt vs. TDP-43KQ/KQ	15.61	-7.539 to 38.75	No	ns	0.2245
TDP-43wt/KQ vs. TDP-43KQ/KQ	19.32	-9.400 to 48.03	No	ns	0.2168
5
TDP-43wt vs. TDP-43wt/KQ	-6.401	-39.42 to 26.61	No	ns	0.8732
TDP-43wt vs. TDP-43KQ/KQ	11.02	-24.07 to 46.12	No	ns	0.69
TDP-43wt/KQ vs. TDP-43KQ/KQ	17.43	-21.46 to 56.31	No	ns	0.4855
Test details	Mean 1	Mean 2	Mean Diff.	SE of diff.	N1	N2	q	DF
1
TDP-43wt vs. TDP-43wt/KQ	41.65	61.26	-19.61	9	15	9	3.081	19.68
TDP-43wt vs. TDP-43KQ/KQ	41.65	32.59	9.06	10.61	15	7	1.207	12.34
TDP-43wt/KQ vs. TDP-43KQ/KQ	61.26	32.59	28.67	10.83	9	7	3.744	11.93
2
TDP-43wt vs. TDP-43wt/KQ	57.23	69.99	-12.76	10.03	15	9	1.8	21.8
TDP-43wt vs. TDP-43KQ/KQ	57.23	53.93	3.306	12.62	15	7	0.3706	13.24
TDP-43wt/KQ vs. TDP-43KQ/KQ	69.99	53.93	16.07	11.88	9	7	1.913	10.62
3
TDP-43wt vs. TDP-43wt/KQ	55.43	60.65	-5.224	11.42	15	9	0.6467	17.51
TDP-43wt vs. TDP-43KQ/KQ	55.43	47.55	7.881	12.1	15	7	0.921	12.63
TDP-43wt/KQ vs. TDP-43KQ/KQ	60.65	47.55	13.11	13.21	9	7	1.403	13.26
4
TDP-43wt vs. TDP-43wt/KQ	57.93	61.64	-3.709	11.2	15	9	0.4683	16.33
TDP-43wt vs. TDP-43KQ/KQ	57.93	42.33	15.61	9.06	15	7	2.436	17.81
TDP-43wt/KQ vs. TDP-43KQ/KQ	61.64	42.33	19.32	10.91	9	7	2.504	13.33
5
TDP-43wt vs. TDP-43wt/KQ	57.19	63.59	-6.401	12.85	15	9	0.7044	16.76
TDP-43wt vs. TDP-43KQ/KQ	57.19	46.17	11.02	13.23	15	7	1.178	12.54
TDP-43wt/KQ vs. TDP-43KQ/KQ	63.59	46.17	17.43	14.8	9	7	1.666	13.51

## Sheet: F4_FS1c-Right
Table Analyzed	18mo Fear- context
Two-way RM ANOVA	Matching: Stacked
Assume sphericity?	No
Alpha	0.05
Source of Variation	% of total variation	P value	P value summary	Significant?	Geisser-Greenhouse's epsilon
Time point x Genotype	3.014	0.0664	ns	No
Time point	2.774	0.0198	*	Yes	0.7281
Genotype	24.18	0.0007	***	Yes
Animal ID	43.66	<0.0001	****	Yes
ANOVA table	SS	DF	MS	F (DFn	DFd)	P value
Time point x Genotype	2843	8	355.3	F (8	132) = 1.891	P=0.0664
Time point	2617	4	654.1	F (2.913	96.11) = 3.482	P=0.0198
Genotype	22804	2	11402	F (2	33) = 9.139	P=0.0007
Animal ID	41171	33	1248	F (33	132) = 6.641	P<0.0001
Residual	24796	132	187.9
Data summary
Number of columns (Genotype)	3
Number of rows (Time point)	5
Number of subjects (Animal ID)	36
Number of missing values	0
Multiple Comparisons Testing:
Within each row	compare columns (simple effects within rows)
Number of families	5
Number of comparisons per family	3
Alpha	0.05
Tukey's multiple comparisons test	Mean Diff.	95.00% CI of diff.	Below threshold?	Summary	Adjusted P Value
1
TDP-43wt vs. TDP-43wt/KQ	20.37	-1.242 to 41.98	No	ns	0.0669
TDP-43wt vs. TDP-43KQ/KQ	37.66	14.63 to 60.70	Yes	**	0.0017
TDP-43wt/KQ vs. TDP-43KQ/KQ	17.3	-2.983 to 37.57	No	ns	0.1033
2
TDP-43wt vs. TDP-43wt/KQ	16.23	-0.1308 to 32.59	No	ns	0.0521
TDP-43wt vs. TDP-43KQ/KQ	41.45	22.36 to 60.53	Yes	****	<0.0001
TDP-43wt/KQ vs. TDP-43KQ/KQ	25.22	8.436 to 42.00	Yes	**	0.0036
3
TDP-43wt vs. TDP-43wt/KQ	9.19	-10.88 to 29.26	No	ns	0.49
TDP-43wt vs. TDP-43KQ/KQ	31.21	5.493 to 56.94	Yes	*	0.0168
TDP-43wt/KQ vs. TDP-43KQ/KQ	22.02	-2.007 to 46.06	No	ns	0.0747
4
TDP-43wt vs. TDP-43wt/KQ	19.2	1.069 to 37.34	Yes	*	0.0365
TDP-43wt vs. TDP-43KQ/KQ	19.6	-6.691 to 45.90	No	ns	0.159
TDP-43wt/KQ vs. TDP-43KQ/KQ	0.4003	-26.18 to 26.98	No	ns	0.9991
5
TDP-43wt vs. TDP-43wt/KQ	14.71	-4.401 to 33.82	No	ns	0.1512
TDP-43wt vs. TDP-43KQ/KQ	24.97	-0.6833 to 50.63	No	ns	0.057
TDP-43wt/KQ vs. TDP-43KQ/KQ	10.26	-13.89 to 34.41	No	ns	0.5212
Test details	Mean 1	Mean 2	Mean Diff.	SE of diff.	N1	N2	q	DF
1
TDP-43wt vs. TDP-43wt/KQ	60.4	40.03	20.37	8.525	10	17	3.379	19.52
TDP-43wt vs. TDP-43KQ/KQ	60.4	22.74	37.66	8.977	10	9	5.934	16.96
TDP-43wt/KQ vs. TDP-43KQ/KQ	40.03	22.74	17.3	7.997	17	9	3.059	19.44
2
TDP-43wt vs. TDP-43wt/KQ	62.72	46.49	16.23	6.412	10	17	3.58	18.05
TDP-43wt vs. TDP-43KQ/KQ	62.72	21.27	41.45	7.435	10	9	7.884	16.89
TDP-43wt/KQ vs. TDP-43KQ/KQ	46.49	21.27	25.22	6.504	17	9	5.484	15.97
3
TDP-43wt vs. TDP-43wt/KQ	64.72	55.53	9.19	7.922	10	17	1.641	19.61
TDP-43wt vs. TDP-43KQ/KQ	64.72	33.51	31.21	9.951	10	9	4.436	15.73
TDP-43wt/KQ vs. TDP-43KQ/KQ	55.53	33.51	22.02	9.221	17	9	3.378	14.55
4
TDP-43wt vs. TDP-43wt/KQ	63.52	44.31	19.2	7.263	10	17	3.739	24.08
TDP-43wt vs. TDP-43KQ/KQ	63.52	43.91	19.6	9.936	10	9	2.79	12.77
TDP-43wt/KQ vs. TDP-43KQ/KQ	44.31	43.91	0.4003	10.18	17	9	0.05561	14.29
5
TDP-43wt vs. TDP-43wt/KQ	60.68	45.97	14.71	7.538	10	17	2.76	19.48
TDP-43wt vs. TDP-43KQ/KQ	60.68	35.71	24.97	9.891	10	9	3.571	15.2
TDP-43wt/KQ vs. TDP-43KQ/KQ	45.97	35.71	10.26	9.203	17	9	1.577	13.7

## Sheet: F4_FS1d-Left
Table Analyzed	12mo Fear- Cue
Two-way RM ANOVA	Matching: Stacked
Assume sphericity?	No
Alpha	0.05
Source of Variation	% of total variation	P value	P value summary	Significant?	Geisser-Greenhouse's epsilon
Time point x Genotype	1.527	0.3096	ns	No
Time point	15.84	<0.0001	****	Yes	0.7389
Genotype	11.06	0.0576	ns	No
Animal ID	48.88	<0.0001	****	Yes
ANOVA table	SS	DF	MS	F (DFn	DFd)	P value
Time point x Genotype	1357	8	169.6	F (8	112) = 1.193	P=0.3096
Time point	14082	4	3521	F (2.956	82.75) = 24.77	P<0.0001
Genotype	9826	2	4913	F (2	28) = 3.167	P=0.0576
Animal ID	43440	28	1551	F (28	112) = 10.91	P<0.0001
Residual	15920	112	142.1
Data summary
Number of columns (Genotype)	3
Number of rows (Time point)	5
Number of subjects (Animal ID)	31
Number of missing values	0
Multiple Comparisons Testing:
Within each row	compare columns (simple effects within rows)
Number of families	5
Number of comparisons per family	3
Alpha	0.05
Tukey's multiple comparisons test	Mean Diff.	95.00% CI of diff.	Below threshold?	Summary	Adjusted P Value
1
TDP-43wt vs. TDP-43wt/KQ	-3.13	-21.20 to 14.94	No	ns	0.8958
TDP-43wt vs. TDP-43KQ/KQ	7.027	-3.506 to 17.56	No	ns	0.2265
TDP-43wt/KQ vs. TDP-43KQ/KQ	10.16	-6.288 to 26.60	No	ns	0.2443
2
TDP-43wt vs. TDP-43wt/KQ	-0.7656	-26.93 to 25.39	No	ns	0.9969
TDP-43wt vs. TDP-43KQ/KQ	15.96	-0.2938 to 32.22	No	ns	0.0548
TDP-43wt/KQ vs. TDP-43KQ/KQ	16.73	-7.038 to 40.50	No	ns	0.1778
3
TDP-43wt vs. TDP-43wt/KQ	6.067	-18.03 to 30.16	No	ns	0.8034
TDP-43wt vs. TDP-43KQ/KQ	24.58	4.886 to 44.28	Yes	*	0.0136
TDP-43wt/KQ vs. TDP-43KQ/KQ	18.52	-0.2658 to 37.30	No	ns	0.0533
4
TDP-43wt vs. TDP-43wt/KQ	3.194	-18.67 to 25.05	No	ns	0.9284
TDP-43wt vs. TDP-43KQ/KQ	23.14	3.739 to 42.54	Yes	*	0.0179
TDP-43wt/KQ vs. TDP-43KQ/KQ	19.95	1.278 to 38.62	Yes	*	0.0359
5
TDP-43wt vs. TDP-43wt/KQ	3.708	-21.69 to 29.10	No	ns	0.9281
TDP-43wt vs. TDP-43KQ/KQ	27.45	6.150 to 48.75	Yes	*	0.0105
TDP-43wt/KQ vs. TDP-43KQ/KQ	23.74	1.879 to 45.60	Yes	*	0.0331
Test details	Mean 1	Mean 2	Mean Diff.	SE of diff.	N1	N2	q	DF
1
TDP-43wt vs. TDP-43wt/KQ	8.575	11.71	-3.13	6.979	15	9	0.6343	15.45
TDP-43wt vs. TDP-43KQ/KQ	8.575	1.549	7.027	4.065	15	7	2.445	15.35
TDP-43wt/KQ vs. TDP-43KQ/KQ	11.71	1.549	10.16	5.81	9	7	2.472	8.38
2
TDP-43wt vs. TDP-43wt/KQ	21.59	22.36	-0.7656	10.14	15	9	0.1068	15.96
TDP-43wt vs. TDP-43KQ/KQ	21.59	5.629	15.96	6.362	15	7	3.549	17.72
TDP-43wt/KQ vs. TDP-43KQ/KQ	22.36	5.629	16.73	8.558	9	7	2.765	9.269
3
TDP-43wt vs. TDP-43wt/KQ	33.26	27.19	6.067	9.574	15	9	0.8961	21.47
TDP-43wt vs. TDP-43KQ/KQ	33.26	8.674	24.58	7.705	15	7	4.512	17.69
TDP-43wt/KQ vs. TDP-43KQ/KQ	27.19	8.674	18.52	6.946	9	7	3.77	10.91
4
TDP-43wt vs. TDP-43wt/KQ	35.66	32.46	3.194	8.685	15	9	0.5201	21.39
TDP-43wt vs. TDP-43KQ/KQ	35.66	12.52	23.14	7.669	15	7	4.268	19.99
TDP-43wt/KQ vs. TDP-43KQ/KQ	32.46	12.52	19.95	7.104	9	7	3.971	13.52
5
TDP-43wt vs. TDP-43wt/KQ	47.56	43.85	3.708	10.06	15	9	0.5212	20.63
TDP-43wt vs. TDP-43KQ/KQ	47.56	20.11	27.45	8.415	15	7	4.613	19.9
TDP-43wt/KQ vs. TDP-43KQ/KQ	43.85	20.11	23.74	8.264	9	7	4.063	12.8

## Sheet: F4_FS1d-Right
Table Analyzed	18mo Fear- Cue
Two-way RM ANOVA	Matching: Stacked
Assume sphericity?	No
Alpha	0.05
Source of Variation	% of total variation	P value	P value summary	Significant?	Geisser-Greenhouse's epsilon
Time point x Genotype	1.233	0.6905	ns	No
Time point	15.93	<0.0001	****	Yes	0.6853
Genotype	7.621	0.0707	ns	No
Animal ID	43.76	<0.0001	****	Yes
ANOVA table	SS	DF	MS	F (DFn	DFd)	P value
Time point x Genotype	563.3	8	70.41	F (8	132) = 0.7006	P=0.6905
Time point	7277	4	1819	F (2.741	90.46) = 18.10	P<0.0001
Genotype	3481	2	1740	F (2	33) = 2.873	P=0.0707
Animal ID	19988	33	605.7	F (33	132) = 6.027	P<0.0001
Residual	13265	132	100.5
Data summary
Number of columns (Genotype)	3
Number of rows (Time point)	5
Number of subjects (Animal ID)	36
Number of missing values	0
Multiple Comparisons Testing:
Within each row	compare columns (simple effects within rows)
Number of families	5
Number of comparisons per family	3
Alpha	0.05
Tukey's multiple comparisons test	Mean Diff.	95.00% CI of diff.	Below threshold?	Summary	Adjusted P Value
1
TDP-43wt vs. TDP-43wt/KQ	10.17	-1.253 to 21.59	No	ns	0.0828
TDP-43wt vs. TDP-43KQ/KQ	11.33	-0.1158 to 22.77	No	ns	0.0524
TDP-43wt/KQ vs. TDP-43KQ/KQ	1.162	-4.261 to 6.585	No	ns	0.8528
2
TDP-43wt vs. TDP-43wt/KQ	7.566	-6.601 to 21.73	No	ns	0.3878
TDP-43wt vs. TDP-43KQ/KQ	15.24	0.04340 to 30.43	Yes	*	0.0493
TDP-43wt/KQ vs. TDP-43KQ/KQ	7.672	-6.738 to 22.08	No	ns	0.3864
3
TDP-43wt vs. TDP-43wt/KQ	9.533	-6.771 to 25.84	No	ns	0.32
TDP-43wt vs. TDP-43KQ/KQ	17.35	-5.161 to 39.87	No	ns	0.1459
TDP-43wt/KQ vs. TDP-43KQ/KQ	7.819	-13.37 to 29.01	No	ns	0.6057
4
TDP-43wt vs. TDP-43wt/KQ	3.722	-8.951 to 16.39	No	ns	0.7449
TDP-43wt vs. TDP-43KQ/KQ	10.41	-6.414 to 27.22	No	ns	0.2714
TDP-43wt/KQ vs. TDP-43KQ/KQ	6.683	-9.917 to 23.28	No	ns	0.561
5
TDP-43wt vs. TDP-43wt/KQ	3.555	-9.213 to 16.32	No	ns	0.7665
TDP-43wt vs. TDP-43KQ/KQ	5.704	-14.08 to 25.49	No	ns	0.7318
TDP-43wt/KQ vs. TDP-43KQ/KQ	2.149	-17.37 to 21.67	No	ns	0.9544
Test details	Mean 1	Mean 2	Mean Diff.	SE of diff.	N1	N2	q	DF
1
TDP-43wt vs. TDP-43wt/KQ	15.48	5.316	10.17	4.264	10	17	3.372	11.66
TDP-43wt vs. TDP-43KQ/KQ	15.48	4.154	11.33	4.268	10	9	3.754	11.56
TDP-43wt/KQ vs. TDP-43KQ/KQ	5.316	4.154	1.162	2.153	17	9	0.7632	21.22
2
TDP-43wt vs. TDP-43wt/KQ	26.01	18.45	7.566	5.637	10	17	1.898	21.86
TDP-43wt vs. TDP-43KQ/KQ	26.01	10.77	15.24	5.92	10	9	3.64	16.9
TDP-43wt/KQ vs. TDP-43KQ/KQ	18.45	10.77	7.672	5.691	17	9	1.906	19.8
3
TDP-43wt vs. TDP-43wt/KQ	34.33	24.79	9.533	6.42	10	17	2.1	19.08
TDP-43wt vs. TDP-43KQ/KQ	34.33	16.98	17.35	8.664	10	9	2.832	14.95
TDP-43wt/KQ vs. TDP-43KQ/KQ	24.79	16.98	7.819	8.036	17	9	1.376	13.13
4
TDP-43wt vs. TDP-43wt/KQ	28.73	25.01	3.722	5.056	10	17	1.041	22.71
TDP-43wt vs. TDP-43KQ/KQ	28.73	18.33	10.41	6.444	10	9	2.283	14.36
TDP-43wt/KQ vs. TDP-43KQ/KQ	25.01	18.33	6.683	6.395	17	9	1.478	15.1
5
TDP-43wt vs. TDP-43wt/KQ	29.01	25.46	3.555	5.085	10	17	0.9886	22.16
TDP-43wt vs. TDP-43KQ/KQ	29.01	23.31	5.704	7.483	10	9	1.078	12.85
TDP-43wt/KQ vs. TDP-43KQ/KQ	25.46	23.31	2.149	7.372	17	9	0.4123	12.72

## Sheet: F4_FS1d-Left_min3-5
Table Analyzed	12mo Fear- Cue: Minutes 3-5
Two-way RM ANOVA	Matching: Stacked
Assume sphericity?	No
Alpha	0.05
Source of Variation	% of total variation	P value	P value summary	Significant?	Geisser-Greenhouse's epsilon
Time point x Genotype	0.1531	0.9311	ns	No
Time point	5.555	<0.0001	****	Yes	0.9785
Genotype	17.13	0.0398	*	Yes
Animal ID	66.17	<0.0001	****	Yes
ANOVA table	SS	DF	MS	F (DFn	DFd)	P value
Time point x Genotype	82.65	4	20.66	F (4	56) = 0.2113	P=0.9311
Time point	2998	2	1499	F (1.957	54.80) = 15.33	P<0.0001
Genotype	9246	2	4623	F (2	28) = 3.624	P=0.0398
Animal ID	35719	28	1276	F (28	56) = 13.05	P<0.0001
Residual	5476	56	97.78
Data summary
Number of columns (Genotype)	3
Number of rows (Time point)	3
Number of subjects (Animal ID)	31
Number of missing values	0
Multiple Comparisons Testing:
Within each row	compare columns (simple effects within rows)
Number of families	3
Number of comparisons per family	3
Alpha	0.05
Tukey's multiple comparisons test	Mean Diff.	95.00% CI of diff.	Below threshold?	Summary	Adjusted P Value
3
TDP-43wt vs. TDP-43wt/KQ	6.067	-18.03 to 30.16	No	ns	0.8034
TDP-43wt vs. TDP-43KQ/KQ	24.58	4.886 to 44.28	Yes	*	0.0136
TDP-43wt/KQ vs. TDP-43KQ/KQ	18.52	-0.2658 to 37.30	No	ns	0.0533
4
TDP-43wt vs. TDP-43wt/KQ	3.194	-18.67 to 25.05	No	ns	0.9284
TDP-43wt vs. TDP-43KQ/KQ	23.14	3.739 to 42.54	Yes	*	0.0179
TDP-43wt/KQ vs. TDP-43KQ/KQ	19.95	1.278 to 38.62	Yes	*	0.0359
5
TDP-43wt vs. TDP-43wt/KQ	3.708	-21.69 to 29.10	No	ns	0.9281
TDP-43wt vs. TDP-43KQ/KQ	27.45	6.150 to 48.75	Yes	*	0.0105
TDP-43wt/KQ vs. TDP-43KQ/KQ	23.74	1.879 to 45.60	Yes	*	0.0331
Test details	Mean 1	Mean 2	Mean Diff.	SE of diff.	N1	N2	q	DF
3
TDP-43wt vs. TDP-43wt/KQ	33.26	27.19	6.067	9.574	15	9	0.8961	21.47
TDP-43wt vs. TDP-43KQ/KQ	33.26	8.674	24.58	7.705	15	7	4.512	17.69
TDP-43wt/KQ vs. TDP-43KQ/KQ	27.19	8.674	18.52	6.946	9	7	3.77	10.91
4
TDP-43wt vs. TDP-43wt/KQ	35.66	32.46	3.194	8.685	15	9	0.5201	21.39
TDP-43wt vs. TDP-43KQ/KQ	35.66	12.52	23.14	7.669	15	7	4.268	19.99
TDP-43wt/KQ vs. TDP-43KQ/KQ	32.46	12.52	19.95	7.104	9	7	3.971	13.52
5
TDP-43wt vs. TDP-43wt/KQ	47.56	43.85	3.708	10.06	15	9	0.5212	20.63
TDP-43wt vs. TDP-43KQ/KQ	47.56	20.11	27.45	8.415	15	7	4.613	19.9
TDP-43wt/KQ vs. TDP-43KQ/KQ	43.85	20.11	23.74	8.264	9	7	4.063	12.8

## Sheet: F4_FS1d-Right_min3-5
Table Analyzed	18mo Fear- Cue: Minutes 3-5
Two-way RM ANOVA	Matching: Stacked
Assume sphericity?	No
Alpha	0.05
Source of Variation	% of total variation	P value	P value summary	Significant?	Geisser-Greenhouse's epsilon
Time point x Genotype	1.354	0.4776	ns	No
Time point	0.2408	0.685	ns	No	0.8095
Genotype	6.705	0.2051	ns	No
Animal ID	66.54	<0.0001	****	Yes
ANOVA table	SS	DF	MS	F (DFn	DFd)	P value
Time point x Genotype	357.7	4	89.42	F (4	66) = 0.8855	P=0.4776
Time point	63.61	2	31.8	F (1.619	53.43) = 0.3150	P=0.6850
Genotype	1771	2	885.3	F (2	33) = 1.663	P=0.2051
Animal ID	17572	33	532.5	F (33	66) = 5.273	P<0.0001
Residual	6665	66	101
Data summary
Number of columns (Genotype)	3
Number of rows (Time point)	3
Number of subjects (Animal ID)	36
Number of missing values	0
Multiple Comparisons Testing:
Within each row	compare columns (simple effects within rows)
Number of families	3
Number of comparisons per family	3
Alpha	0.05
Tukey's multiple comparisons test	Mean Diff.	95.00% CI of diff.	Below threshold?	Summary	Adjusted P Value
3
TDP-43wt vs. TDP-43wt/KQ	9.533	-6.771 to 25.84	No	ns	0.32
TDP-43wt vs. TDP-43KQ/KQ	17.35	-5.161 to 39.87	No	ns	0.1459
TDP-43wt/KQ vs. TDP-43KQ/KQ	7.819	-13.37 to 29.01	No	ns	0.6057
4
TDP-43wt vs. TDP-43wt/KQ	3.722	-8.951 to 16.39	No	ns	0.7449
TDP-43wt vs. TDP-43KQ/KQ	10.41	-6.414 to 27.22	No	ns	0.2714
TDP-43wt/KQ vs. TDP-43KQ/KQ	6.683	-9.917 to 23.28	No	ns	0.561
5
TDP-43wt vs. TDP-43wt/KQ	3.555	-9.213 to 16.32	No	ns	0.7665
TDP-43wt vs. TDP-43KQ/KQ	5.704	-14.08 to 25.49	No	ns	0.7318
TDP-43wt/KQ vs. TDP-43KQ/KQ	2.149	-17.37 to 21.67	No	ns	0.9544
Test details	Mean 1	Mean 2	Mean Diff.	SE of diff.	N1	N2	q	DF
3
TDP-43wt vs. TDP-43wt/KQ	34.33	24.79	9.533	6.42	10	17	2.1	19.08
TDP-43wt vs. TDP-43KQ/KQ	34.33	16.98	17.35	8.664	10	9	2.832	14.95
TDP-43wt/KQ vs. TDP-43KQ/KQ	24.79	16.98	7.819	8.036	17	9	1.376	13.13
4
TDP-43wt vs. TDP-43wt/KQ	28.73	25.01	3.722	5.056	10	17	1.041	22.71
TDP-43wt vs. TDP-43KQ/KQ	28.73	18.33	10.41	6.444	10	9	2.283	14.36
TDP-43wt/KQ vs. TDP-43KQ/KQ	25.01	18.33	6.683	6.395	17	9	1.478	15.1
5
TDP-43wt vs. TDP-43wt/KQ	29.01	25.46	3.555	5.085	10	17	0.9886	22.16
TDP-43wt vs. TDP-43KQ/KQ	29.01	23.31	5.704	7.483	10	9	1.078	12.85
TDP-43wt/KQ vs. TDP-43KQ/KQ	25.46	23.31	2.149	7.372	17	9	0.4123	12.72

[truncated: 4 more sheets: F4_FS1e, F4_FS1f, F4_FS1g, F4_FS1h]
