# Supplementary material for: RNA-binding deficient TDP-43 drives cognitive decline in a mouse model of TDP-43 proteinopathy
Source: eLife. 2023 Oct 11;12:RP85921. doi: 10.7554/eLife.85921 (PMC10567115; doi:10.7554/eLife.85921)
Supplement: Figure 4—figure supplement 3—source data 1. [file elife-85921-fig4-figsupp3-data1.xlsx]

## Sheet: S5A_12m
Figure S5A Source Data: Statistical analysis results (12mo old distance traveled in an open field)
Table Analyzed	12mo Open Field Distance
Two-way RM ANOVA	Matching: Stacked
Assume sphericity?	No
Alpha	0.05
Source of Variation	% of total variation	P value	P value summary	Significant?	Geisser-Greenhouse's epsilon
Time x Genotype	1.521	0.3035	ns	No
Time	37.59	<0.0001	****	Yes	0.4747
Genotype	0.4613	0.5776	ns	No
Animal	28.8	<0.0001	****	Yes
ANOVA table	SS	DF	MS	F (DFn	DFd)	P value
Time x Genotype	234607	11	21328	F (11	220) = 1.178	P=0.3035
Time	5799617	11	527238	F (5.222	104.4) = 29.12	P<0.0001
Genotype	71175	1	71175	F (1	20) = 0.3204	P=0.5776
Animal	4442443	20	222122	F (20	220) = 12.27	P<0.0001
Residual	3982976	220	18104
Difference between column means
Mean of TDP-43wt	459
Mean of TDP-43KQ/KQ	494.3
Difference between means	-35.25
SE of difference	62.28
95% CI of difference	-165.2 to 94.65
Data summary
Number of columns (Genotype)	2
Number of rows (Time)	12
Number of subjects (Animal)	22
Number of missing values	0
Multiple comparisons testing:
Compare each cell mean with the other cell mean in that row
Number of families	1
Number of comparisons per family	12
Alpha	0.05
Holm-Šídák's multiple comparisons test	Mean Diff.	Below threshold?	Summary	Adjusted P Value
TDP-43wt - TDP-43KQ/KQ
5	-89.81	No	ns	0.9751
10	-18.88	No	ns	0.998
15	-41.88	No	ns	0.9794
20	-7.905	No	ns	0.998
25	43.12	No	ns	0.9751
30	95.41	No	ns	0.8598
35	9.143	No	ns	0.998
40	-17.9	No	ns	0.998
45	-95.58	No	ns	0.951
50	-79.54	No	ns	0.951
55	-148.2	No	ns	0.3305
60	-71.06	No	ns	0.9706
Test details	Mean 1	Mean 2	Mean Diff.	SE of diff.	N1	N2	t	DF
TDP-43wt - TDP-43KQ/KQ
5	894.3	984.1	-89.81	106.7	15	7	0.8419	19.95
10	580.3	599.1	-18.88	79.01	15	7	0.2389	19.63
15	511.3	553.1	-41.88	67.11	15	7	0.624	19.24
20	509.7	517.6	-7.905	50.37	15	7	0.1569	19.41
25	459.3	416.1	43.12	51.27	15	7	0.8411	18.04
30	473.3	377.9	95.41	65.68	15	7	1.453	17.95
35	449	439.9	9.143	56.67	15	7	0.1613	19.54
40	413.5	431.4	-17.9	65.83	15	7	0.2718	16.72
45	337.1	432.7	-95.58	80.89	15	7	1.182	11.92
50	345.6	425.1	-79.54	70.31	15	7	1.131	16.45
55	255.3	403.4	-148.2	64.01	15	7	2.315	17.67
60	279.8	350.9	-71.06	75.14	15	7	0.9457	18.42

## Sheet: S5A_18m
Figure S5A Source Data: Statistical analysis results (18mo old distance traveled in an open field)
Table Analyzed	16mo Open Field Distance
Two-way RM ANOVA	Matching: Stacked
Assume sphericity?	No
Alpha	0.05
Source of Variation	% of total variation	P value	P value summary	Significant?	Geisser-Greenhouse's epsilon
Time x Genotype	5.987	0.0001	***	Yes
Time	37.43	<0.0001	****	Yes	0.4368
Genotype	0.4014	0.6437	ns	No
Animal	28.89	<0.0001	****	Yes
ANOVA table	SS	DF	MS	F (DFn	DFd)	P value
Time x Genotype	804128	11	73103	F (11	176) = 3.595	P=0.0001
Time	5027772	11	457070	F (4.804	76.87) = 22.47	P<0.0001
Genotype	53919	1	53919	F (1	16) = 0.2223	P=0.6437
Animal	3880966	16	242560	F (16	176) = 11.93	P<0.0001
Residual	3579311	176	20337
Difference between column means
Mean of TDP-43wt	335.8
Mean of TDP-43KQ/KQ	367.6
Difference between means	-31.8
SE of difference	67.44
95% CI of difference	-174.8 to 111.2
Data summary
Number of columns (Genotype)	2
Number of rows (Time)	12
Number of subjects (Animal)	18
Number of missing values	0
Multiple comparisons testing:
Compare each cell mean with the other cell mean in that row
Number of families	1
Number of comparisons per family	12
Alpha	0.05
Holm-Šídák's multiple comparisons test	Mean Diff.	Below threshold?	Summary	Adjusted P Value
TDP-43wt - TDP-43KQ/KQ
5	-279.7	No	ns	0.5297
10	43.23	No	ns	0.8616
15	94.15	No	ns	0.8321
20	84.5	No	ns	0.8505
25	160.6	No	ns	0.5297
30	-5.6	No	ns	0.9573
35	82.18	No	ns	0.8505
40	-100.3	No	ns	0.8321
45	-89.95	No	ns	0.8321
50	-137.6	No	ns	0.6106
55	-124.3	No	ns	0.3916
60	-108.8	No	ns	0.587
Test details	Mean 1	Mean 2	Mean Diff.	SE of diff.	N1	N2	t	DF
TDP-43wt - TDP-43KQ/KQ
5	583.4	863.1	-279.7	141.9	10	8	1.971	15.95
10	465.1	421.9	43.23	87.02	10	8	0.4967	12.61
15	481.4	387.3	94.15	74.6	10	8	1.262	16
20	468.5	384	84.5	92.42	10	8	0.9143	12.26
25	510.5	349.9	160.6	81.99	10	8	1.959	12.72
30	408.9	414.5	-5.6	102.5	10	8	0.05465	12.93
35	357.3	275.1	82.18	98.78	10	8	0.8319	11.51
40	233.8	334.1	-100.3	82.59	10	8	1.215	14.85
45	167.8	257.8	-89.95	76.88	10	8	1.17	15.73
50	112.7	250.3	-137.6	80.7	10	8	1.704	13.49
55	114.5	238.8	-124.3	54.88	10	8	2.264	13.53
60	125.8	234.6	-108.8	60.55	10	8	1.797	14.19

## Sheet: S5B_Speed
Figure S5B Source Data: Statistical analysis results (18mo swim velocity during Morris Water Maze testing)
Table Analyzed	16mo swim speed
Two-way ANOVA	Ordinary
Alpha	0.05
Source of Variation	% of total variation	P value	P value summary	Significant?
Interaction	10.5	0.058	ns	No
Quadrant	6.28	0.1745	ns	No
Genotype	0.0111	0.9366	ns	No
ANOVA table	SS (Type III)	DF	MS	F (DFn	DFd)	P value
Interaction	38.2	2	19.1	F (2	48) = 3.02	P=0.0580
Quadrant	22.9	2	11.4	F (2	48) = 1.81	P=0.1745
Genotype	0.0403	1	0.0403	F (1	48) = 0.00639	P=0.9366
Residual	303	48	6.31
Difference between column means
Predicted (LS) mean of TDP-43wt	13.8
Predicted (LS) mean of TDP-43KQ/KQ	13.9
Difference between predicted means	-0.055
SE of difference	0.688
95% CI of difference	-1.44 to 1.33
Data summary
Number of columns (Genotype)	2
Number of rows (Quadrant)	3
Number of values	54
Multiple Comparisons Testing:
Compare each cell mean with the other cell mean in that row
Number of families	1
Number of comparisons per family	3
Alpha	0.05
Holm-Šídák's multiple comparisons test	Predicted (LS) mean diff.	Below threshold?	Summary	Adjusted P Value
TDP-43wt - TDP-43KQ/KQ
Visible	-1.98	No	ns	0.2193
Hidden	-0.32	No	ns	0.7895
Reversal	2.14	No	ns	0.2193
Test details	Predicted (LS) mean 1	Predicted (LS) mean 2	Predicted (LS) mean diff.	SE of diff.	N1	N2	t	DF
TDP-43wt - TDP-43KQ/KQ
Visible	12.4	14.4	-1.98	1.19	10	8	1.66	48
Hidden	14.6	15	-0.32	1.19	10	8	0.268	48
Reversal	14.5	12.3	2.14	1.19	10	8	1.79	48

## Sheet: S5C_18mRotarod
Figure S5C Source Data: Statistical analysis results (18mo Rotarod performance)
Table Analyzed	16mo Rotarod
Two-way RM ANOVA	Matching: Stacked
Assume sphericity?	No
Alpha	0.05
Source of Variation	% of total variation	P value	P value summary	Significant?	Geisser-Greenhouse's epsilon
Time x Genotype	1.305	0.6889	ns	No
Time	35.48	<0.0001	****	Yes	0.6184
Genotype	1.423	0.3174	ns	No
Animal	22.79	0.0076	**	Yes
ANOVA table	SS	DF	MS	F (DFn	DFd)	P value
Time x Genotype	4815	4	1204	F (4	68) = 0.5649	P=0.6889
Time	130893	4	32723	F (2.473	42.05) = 15.36	P<0.0001
Genotype	5249	1	5249	F (1	17) = 1.061	P=0.3174
Animal	84105	17	4947	F (17	68) = 2.322	P=0.0076
Residual	144896	68	2131
Difference between column means
Mean of TDP-43wt	105.6
Mean of TDP-43KQ/KQ	120.5
Difference between means	-14.89
SE of difference	14.45
95% CI of difference	-45.38 to 15.61
Data summary
Number of columns (Genotype)	2
Number of rows (Time)	5
Number of subjects (Animal)	19
Number of missing values	0
Multiple Comparisons Testing:
Compare each cell mean with the other cell mean in that row
Number of families	1
Number of comparisons per family	5
Alpha	0.05
Šídák's multiple comparisons test	Mean Diff.	95.00% CI of diff.	Below threshold?	Summary	Adjusted P Value
TDP-43wt - TDP-43KQ/KQ
1	-1.4	-47.73 to 44.93	No	ns	>0.9999
2	-20.7	-68.59 to 27.19	No	ns	0.7222
3	5.022	-56.60 to 66.65	No	ns	0.9997
4	-32.14	-104.4 to 40.14	No	ns	0.7023
5	-25.21	-133.2 to 82.78	No	ns	0.969
Test details	Mean 1	Mean 2	Mean Diff.	SE of diff.	N1	N2	t	DF
TDP-43wt - TDP-43KQ/KQ
1	58.6	60	-1.4	15.99	10	9	0.08757	16.56
2	79.3	100	-20.7	16.43	10	9	1.26	15.86
3	119.8	114.8	5.022	20.37	10	9	0.2466	12.41
4	113.3	145.4	-32.14	24.94	10	9	1.289	16.57
5	156.9	182.1	-25.21	36.49	10	9	0.691	14.21

## Sheet: S5D_RotSum
Figure S5D Source Data: Statistical analysis results (Mean Rotarod performance across ages)
Table Analyzed	6v9v18mo avg Rotarod
Two-way ANOVA	Ordinary
Alpha	0.05
Source of Variation	% of total variation	P value	P value summary	Significant?
Interaction	0.2695	0.9246	ns	No
Age	2.736	0.4557	ns	No
Genotype	2.921	0.1975	ns	No
ANOVA table	SS (Type III)	DF	MS	F (DFn	DFd)	P value
Interaction	569	2	284.5	F (2	55) = 0.07853	P=0.9246
Age	5777	2	2888	F (2	55) = 0.7973	P=0.4557
Genotype	6166	1	6166	F (1	55) = 1.702	P=0.1975
Residual	199249	55	3623
Difference between column means
Predicted (LS) mean of TDP-43wt	152.7
Predicted (LS) mean of TDP-43KQ/KQ	173.2
Difference between predicted means	-20.53
SE of difference	15.73
95% CI of difference	-52.06 to 11.00
Data summary
Number of columns (Genotype)	2
Number of rows (Age)	3
Number of values	61
Multiple Comparisons Testing:
Compare each cell mean with the other cell mean in that row
Number of families	1
Number of comparisons per family	3
Alpha	0.05
Holm-Šídák's multiple comparisons test	Predicted (LS) mean diff.	Below threshold?	Summary	Adjusted P Value
TDP-43wt - TDP-43KQ/KQ
6	-13.44	No	ns	0.7242
9	-19.46	No	ns	0.7242
18	-28.68	No	ns	0.6633
Test details	Predicted (LS) mean 1	Predicted (LS) mean 2	Predicted (LS) mean diff.	SE of diff.	N1	N2	t	DF
TDP-43wt - TDP-43KQ/KQ
6	159.5	172.9	-13.44	27.05	13	8	0.4968	55
9	163.5	183	-19.46	27.05	13	8	0.7196	55
18	135.1	163.8	-28.68	27.65	10	9	1.037	55

## Sheet: S5E_18moGrip
Figure S5E Source Data: Statistical analysis results (Mean grip strength by forcemeter at 18mo)
Table Analyzed	16mo Avg GripStrengthMeter
Two-way RM ANOVA	Matching: Stacked
Assume sphericity?	Yes
Alpha	0.05
Source of Variation	% of total variation	P value	P value summary	Significant?
Time x Genotype	0.4415	0.2313	ns	No
Time	87.62	<0.0001	****	Yes
Genotype	0.537	0.2201	ns	No
Animal	5.632	0.3837	ns	No
ANOVA table	SS	DF	MS	F (DFn	DFd)	P value
Time x Genotype	0.05408	1	0.05408	F (1	17) = 1.541	P=0.2313
Time	10.73	1	10.73	F (1	17) = 305.9	P<0.0001
Genotype	0.06579	1	0.06579	F (1	17) = 1.621	P=0.2201
Animal	0.69	17	0.04059	F (17	17) = 1.157	P=0.3837
Residual	0.5964	17	0.03508
Difference between row means
Mean of Forepaws	1.126
Mean of All paws	2.191
Difference between means	-1.064
SE of difference	0.06086
95% CI of difference	-1.193 to -0.9361
Difference between column means
Mean of TDP-43wt	1.7
Mean of TDP-43KQ/KQ	1.617
Difference between means	0.08333
SE of difference	0.06545
95% CI of difference	-0.05476 to 0.2214
Interaction CI
Mean diff	A1 - B1	0.007778
Mean diff	A2 - B2	0.1589
(A1 -B1) - (A2 - B2)	-0.1511
95% CI of difference	-0.4079 to 0.1057
(B1 - A1) - (B2 - A2)	0.1511
95% CI of difference	-0.1057 to 0.4079
Data summary
Number of columns (Genotype)	2
Number of rows (Time)	2
Number of subjects (Animal)	19
Number of missing values	0
Multiple Comparisons Testing:
Compare each cell mean with the other cell mean in that row
Number of families	1
Number of comparisons per family	2
Alpha	0.05
Šídák's multiple comparisons test	Predicted (LS) mean diff.	95.00% CI of diff.	Below threshold?	Summary	Adjusted P Value
TDP-43wt - TDP-43KQ/KQ
Forepaws	0.007778	-0.2013 to 0.2169	No	ns	0.9953
All paws	0.1589	-0.05020 to 0.3680	No	ns	0.1616
Test details	Predicted (LS) mean 1	Predicted (LS) mean 2	Predicted (LS) mean diff.	SE of diff.	N1	N2	t	DF
TDP-43wt - TDP-43KQ/KQ
Forepaws	1.13	1.122	0.007778	0.08937	10	9	0.08702	34
All paws	2.27	2.111	0.1589	0.08937	10	9	1.778	34
