# Supplementary material for: RNA-binding deficient TDP-43 drives cognitive decline in a mouse model of TDP-43 proteinopathy
Source: eLife. 2023 Oct 11;12:RP85921. doi: 10.7554/eLife.85921 (PMC10567115; doi:10.7554/eLife.85921)
Supplement: Figure 4—source data 1. [file elife-85921-fig4-data1.xlsx]

## Sheet: 4A_WeightMales
Figure 4A Source Data: Statistical analysis results (Male body weight)
Table Analyzed	Compiled Ages WTvKQ male
Two-way ANOVA	Ordinary
Alpha	0.05
Source of Variation	% of total variation	P value	P value summary	Significant?
Interaction	1.063	0.6827	ns	No
Age	8.267	0.0597	ns	No
Genotype	24.21	0.0001	***	Yes
ANOVA table	SS (Type III)	DF	MS	F (DFn	DFd)	P value
Interaction	41.17	2	20.59	F (2	48) = 0.3847	P=0.6827
Age	320.1	2	160	F (2	48) = 2.991	P=0.0597
Genotype	937.4	1	937.4	F (1	48) = 17.52	P=0.0001
Residual	2569	48	53.51
Difference between column means
Predicted (LS) mean of TDP-43wt	41.9
Predicted (LS) mean of TDP-43KQ/KQ	33.42
Difference between predicted means	8.483
SE of difference	2.027
95% CI of difference	4.408 to 12.56
Data summary
Number of columns (Genotype)	2
Number of rows (Age)	3
Number of values	54
Multiple Comparisons Testing:
Compare each cell mean with the other cell mean in that row
Number of families	1
Number of comparisons per family	3
Alpha	0.05
Šídák's multiple comparisons test	Predicted (LS) mean diff.	95.00% CI of diff.	Below threshold?	Summary	Adjusted P Value
TDP-43wt - TDP-43KQ/KQ
6	5.861	-3.677 to 15.40	No	ns	0.3528
12	10.12	1.588 to 18.65	Yes	*	0.0153
18	9.47	1.562 to 17.38	Yes	*	0.0141
Test details	Predicted (LS) mean 1	Predicted (LS) mean 2	Predicted (LS) mean diff.	SE of diff.	N1	N2	t	DF
TDP-43wt - TDP-43KQ/KQ
6	36.94	31.08	5.861	3.855	9	6	1.52	48
12	44.24	34.12	10.12	3.448	9	9	2.934	48
18	44.52	35.05	9.47	3.196	10	11	2.963	48

## Sheet: 4A_WeightFemales
Figure 4A Source Data: Statistical analysis results (Female body weight)
Table Analyzed	Compiled Ages WTvKQ female
Two-way ANOVA	Ordinary
Alpha	0.05
Source of Variation	% of total variation	P value	P value summary	Significant?
Interaction	0.07952	0.9681	ns	No
Age	32.62	<0.0001	****	Yes
Genotype	17.36	0.0006	***	Yes
ANOVA table	SS (Type III)	DF	MS	F (DFn	DFd)	P value
Interaction	2.382	2	1.191	F (2	36) = 0.03245	P=0.9681
Age	977.3	2	488.6	F (2	36) = 13.31	P<0.0001
Genotype	520.1	1	520.1	F (1	36) = 14.17	P=0.0006
Residual	1322	36	36.71
Difference between column means
Predicted (LS) mean of TDP-43wt	36.58
Predicted (LS) mean of TDP-43KQ/KQ	28.21
Difference between predicted means	8.37
SE of difference	2.224
95% CI of difference	3.860 to 12.88
Data summary
Number of columns (Genotype)	2
Number of rows (Age)	3
Number of values	42
Multiple Comparisons Testing:
Compare each cell mean with the other cell mean in that row
Number of families	1
Number of comparisons per family	3
Alpha	0.05
Šídák's multiple comparisons test	Predicted (LS) mean diff.	95.00% CI of diff.	Below threshold?	Summary	Adjusted P Value
TDP-43wt - TDP-43KQ/KQ
6	7.65	-5.489 to 20.79	No	ns	0.3935
12	9.053	2.363 to 15.74	Yes	**	0.0051
18	8.408	0.5561 to 16.26	Yes	*	0.0326
Test details	Predicted (LS) mean 1	Predicted (LS) mean 2	Predicted (LS) mean diff.	SE of diff.	N1	N2	t	DF
TDP-43wt - TDP-43KQ/KQ
6	28.6	20.95	7.65	5.247	4	2	1.458	36
12	37.22	28.16	9.053	2.672	12	9	3.388	36
18	43.93	35.53	8.408	3.136	8	7	2.681	36

## Sheet: 4B_12mCenterTime
Figure 4B Source Data: Statistical analysis results (12mo old time in center of open field)
Table Analyzed	12mo Open Field center time
Two-way RM ANOVA	Matching: Stacked
Assume sphericity?	No
Alpha	0.05
Source of Variation	% of total variation	P value	P value summary	Significant?	Geisser-Greenhouse's epsilon
Time x Genotype	1.507	0.3551	ns	No
Time	6.821	0.0001	***	Yes	0.5521
Genotype	14.72	0.0225	*	Yes
Animal	48.12	<0.0001	****	Yes
ANOVA table	SS	DF	MS	F (DFn	DFd)	P value
Time x Genotype	4282	11	389.3	F (11	220) = 1.109	P=0.3551
Time	19379	11	1762	F (6.073	121.5) = 5.019	P=0.0001
Genotype	41821	1	41821	F (1	20) = 6.118	P=0.0225
Animal	136703	20	6835	F (20	220) = 19.47	P<0.0001
Residual	77217	220	351
Difference between column means
Mean of TDP-43wt	27.06
Mean of TDP-43KQ/KQ	54.08
Difference between means	-27.02
SE of difference	10.92
95% CI of difference	-49.81 to -4.234
Data summary
Number of columns (Genotype)	2
Number of rows (Time)	12
Number of subjects (Animal)	22
Number of missing values	0
Multiple comparisons testing:
Compare each cell mean with the other cell mean in that row
Number of families	1
Number of comparisons per family	12
Alpha	0.05
Holm-Šídák's multiple comparisons test	Mean Diff.	Below threshold?	Summary	Adjusted P Value
TDP-43wt - TDP-43KQ/KQ
5	-15.37	No	ns	0.7304
10	-26.97	No	ns	0.6807
15	-15.65	No	ns	0.7304
20	-21.66	No	ns	0.7304
25	-30.03	No	ns	0.3652
30	-34.41	No	ns	0.6807
35	-33.25	No	ns	0.6807
40	-15.65	No	ns	0.7304
45	-26.51	No	ns	0.5262
50	-45.32	No	ns	0.5912
55	-33.02	No	ns	0.6807
60	-26.43	No	ns	0.6807
Test details	Mean 1	Mean 2	Mean Diff.	SE of diff.	N1	N2	t	DF
TDP-43wt - TDP-43KQ/KQ
5	42.03	57.4	-15.37	16.53	15	7	0.9295	8.085
10	39.5	66.47	-26.97	15.48	15	7	1.743	6.686
15	44.04	59.69	-15.65	15.49	15	7	1.01	8.357
20	37.94	59.6	-21.66	18.6	15	7	1.165	7.594
25	19.83	49.86	-30.03	12.31	15	7	2.439	9.1
30	30.99	65.4	-34.41	23.54	15	7	1.462	6.765
35	21.57	54.81	-33.25	18.59	15	7	1.788	6.562
40	22.02	37.67	-15.65	17.37	15	7	0.9013	7.258
45	19.16	45.67	-26.51	12.56	15	7	2.111	8.53
50	19.87	65.19	-45.32	22.5	15	7	2.014	6.718
55	15.53	48.56	-33.02	18.74	15	7	1.763	7.382
60	12.26	38.69	-26.43	15.93	15	7	1.659	6.882

## Sheet: 4B_18mCenterTime
Figure 4B Source Data: Statistical analysis results (18mo old time in center of open field)
Table Analyzed	16mo Open Field center time
Two-way RM ANOVA	Matching: Stacked
Assume sphericity?	No
Alpha	0.05
Source of Variation	% of total variation	P value	P value summary	Significant?	Geisser-Greenhouse's epsilon
Time x Genotype	4.339	0.0625	ns	No
Time	26.48	<0.0001	****	Yes	0.3669
Genotype	10.22	0.0065	**	Yes
Animal	18.07	<0.0001	****	Yes
ANOVA table	SS	DF	MS	F (DFn	DFd)	P value
Time x Genotype	3957	11	359.7	F (11	187) = 1.766	P=0.0625
Time	24151	11	2196	F (4.036	68.62) = 10.78	P<0.0001
Genotype	9325	1	9325	F (1	17) = 9.622	P=0.0065
Animal	16476	17	969.2	F (17	187) = 4.758	P<0.0001
Residual	38092	187	203.7
Difference between column means
Mean of TDP-43wt	8.866
Mean of TDP-43KQ/KQ	21.67
Difference between means	-12.81
SE of difference	4.129
95% CI of difference	-21.52 to -4.096
Data summary
Number of columns (Genotype)	2
Number of rows (Time)	12
Number of subjects (Animal)	19
Number of missing values	0
Multiple comparisons testing:
Compare each cell mean with the other cell mean in that row
Number of families	1
Number of comparisons per family	12
Alpha	0.05
Holm-Šídák's multiple comparisons test	Mean Diff.	Below threshold?	Summary	Adjusted P Value
TDP-43wt - TDP-43KQ/KQ
5	-28.51	No	ns	0.1899
10	-20.29	No	ns	0.4157
15	-28.64	No	ns	0.3741
20	-11.56	No	ns	0.4157
25	-5.612	No	ns	0.6478
30	-7.638	No	ns	0.4812
35	-4.163	No	ns	0.6478
40	-15.53	No	ns	0.4157
45	-12.14	No	ns	0.0724
50	-7.592	No	ns	0.3939
55	-6.327	No	ns	0.3741
60	-5.709	No	ns	0.1959
Test details	Mean 1	Mean 2	Mean Diff.	SE of diff.	N1	N2	t	DF
TDP-43wt - TDP-43KQ/KQ
5	18.4	46.91	-28.51	10.95	10	9	2.603	16.35
10	20.37	40.66	-20.29	12.11	10	9	1.676	14.52
15	16.84	45.48	-28.64	12.9	10	9	2.22	9.971
20	12	23.56	-11.56	6.505	10	9	1.776	14
25	13.41	19.02	-5.612	6.592	10	9	0.8514	16.83
30	11.14	18.78	-7.638	5.674	10	9	1.346	16.52
35	6.97	11.13	-4.163	7.742	10	9	0.5378	11.24
40	2.37	17.9	-15.53	7.998	10	9	1.942	8.574
45	1.24	13.38	-12.14	3.48	10	9	3.488	9.56
50	2.13	9.722	-7.592	3.693	10	9	2.056	9.269
55	0.54	6.867	-6.327	2.81	10	9	2.252	8.383
60	0.98	6.689	-5.709	2.108	10	9	2.708	10.25

## Sheet: 4C_12mo Context
Figure 4C Source Data: Statistical analysis results (12mo old context-dependent fear conditioning)
Table Analyzed	12m WTvKQ 5min Fear context
Two-way RM ANOVA	Matching: Stacked
Assume sphericity?	No
Alpha	0.05
Source of Variation	% of total variation	P value	P value summary	Significant?	Geisser-Greenhouse's epsilon
Minute x Genotype	0.496	0.7553	ns	No
Minute	4.887	0.005	**	Yes	0.7682
Genotype	2.701	0.3915	ns	No
Animal	70.42	<0.0001	****	Yes
ANOVA table	SS	DF	MS	F (DFn	DFd)	P value
Minute x Genotype	385.2	4	96.3	F (4	80) = 0.4731	P=0.7553
Minute	3795	4	948.8	F (3.073	61.46) = 4.661	P=0.0050
Genotype	2098	1	2098	F (1	20) = 0.7671	P=0.3915
Animal	54693	20	2735	F (20	80) = 13.43	P<0.0001
Residual	16285	80	203.6
Difference between column means
Mean of TDP-43wt	53.89
Mean of TDP-43KQ/KQ	44.51
Difference between means	9.376
SE of difference	10.7
95% CI of difference	-12.95 to 31.71
Data summary
Number of columns (Genotype)	2
Number of rows (Minute)	5
Number of subjects (Animal)	22
Number of missing values	0
Multiple Comparisons Testing:
Compare each cell mean with the other cell mean in that row
Number of families	1
Number of comparisons per family	5
Alpha	0.05
Holm-Šídák's multiple comparisons test	Mean Diff.	Below threshold?	Summary	Adjusted P Value
TDP-43wt - TDP-43KQ/KQ
1	9.06	No	ns	0.8784
2	3.306	No	ns	0.8784
3	7.881	No	ns	0.8784
4	15.61	No	ns	0.417
5	11.02	No	ns	0.8784
Test details	Mean 1	Mean 2	Mean Diff.	SE of diff.	N1	N2	t	DF
TDP-43wt - TDP-43KQ/KQ
1	41.65	32.59	9.06	10.61	15	7	0.8538	12.34
2	57.23	53.93	3.306	12.62	15	7	0.2621	13.24
3	55.43	47.55	7.881	12.1	15	7	0.6512	12.63
4	57.93	42.33	15.61	9.06	15	7	1.722	17.81
5	57.19	46.17	11.02	13.23	15	7	0.8333	12.54

## Sheet: 4C_18mo Context
Figure 4C Source Data: Statistical analysis results (18mo old context-dependent fear conditioning)
Table Analyzed	18m WTvKQ 5min Fear context
Two-way RM ANOVA	Matching: Stacked
Assume sphericity?	No
Alpha	0.05
Source of Variation	% of total variation	P value	P value summary	Significant?	Geisser-Greenhouse's epsilon
Minute x Genotype	2.517	0.0948	ns	No
Minute	3.321	0.0633	ns	No	0.645
Genotype	37.77	0.0006	***	Yes
Animal	35.96	<0.0001	****	Yes
ANOVA table	SS	DF	MS	F (DFn	DFd)	P value
Minute x Genotype	1515	4	378.8	F (4	68) = 2.067	P=0.0948
Minute	1999	4	499.8	F (2.580	43.86) = 2.727	P=0.0633
Genotype	22732	1	22732	F (1	17) = 17.86	P=0.0006
Animal	21642	17	1273	F (17	68) = 6.946	P<0.0001
Residual	12464	68	183.3
Difference between column means
Mean of TDP-43wt	62.41
Mean of TDP-43KQ/KQ	31.43
Difference between means	30.98
SE of difference	7.332
95% CI of difference	15.51 to 46.45
Data summary
Number of columns (Genotype)	2
Number of rows (Minute)	5
Number of subjects (Animal)	19
Number of missing values	0
Multiple Comparisons Testing:
Compare each cell mean with the other cell mean in that row
Number of families	1
Number of comparisons per family	5
Alpha	0.05
Holm-Šídák's multiple comparisons test	Mean Diff.	Below threshold?	Summary	Adjusted P Value
TDP-43wt - TDP-43KQ/KQ
1	37.66	Yes	**	0.0024
2	41.45	Yes	***	0.0002
3	31.21	Yes	*	0.0193
4	19.6	No	ns	0.0706
5	24.97	Yes	*	0.0458
Test details	Mean 1	Mean 2	Mean Diff.	SE of diff.	N1	N2	t	DF
TDP-43wt - TDP-43KQ/KQ
1	60.4	22.74	37.66	8.977	10	9	4.196	16.96
2	62.72	21.27	41.45	7.435	10	9	5.575	16.89
3	64.72	33.51	31.21	9.951	10	9	3.137	15.73
4	63.52	43.91	19.6	9.936	10	9	1.973	12.77
5	60.68	35.71	24.97	9.891	10	9	2.525	15.2

## Sheet: 4D_12mo Cue
Figure 4D Source Data: Statistical analysis results (12mo old cue-dependent fear conditioning)
Table Analyzed	12m WTvKQ Fear- Cue: Minutes 3-5
Two-way RM ANOVA	Matching: Stacked
Assume sphericity?	No
Alpha	0.05
Source of Variation	% of total variation	P value	P value summary	Significant?	Geisser-Greenhouse's epsilon
Minute x Genotype	0.1054	0.7399	ns	No
Minute	3.951	0.0003	***	Yes	0.8808
Genotype	20.64	0.0223	*	Yes
Animal	67.28	<0.0001	****	Yes
ANOVA table	SS	DF	MS	F (DFn	DFd)	P value
Minute x Genotype	45.9	2	22.95	F (2	40) = 0.3036	P=0.7399
Minute	1721	2	860.3	F (1.762	35.23) = 11.38	P=0.0003
Genotype	8990	1	8990	F (1	20) = 6.136	P=0.0223
Animal	29302	20	1465	F (20	40) = 19.38	P<0.0001
Residual	3024	40	75.6
Difference between column means
Mean of TDP-43wt	38.82
Mean of TDP-43KQ/KQ	13.77
Difference between means	25.06
SE of difference	10.12
95% CI of difference	3.957 to 46.16
Data summary
Number of columns (Genotype)	2
Number of rows (Minute)	3
Number of subjects (Animal)	22
Number of missing values	0
Multiple Comparisons Testing:
Compare each cell mean with the other cell mean in that row
Number of families	1
Number of comparisons per family	3
Alpha	0.05
Holm-Šídák's multiple comparisons test	Mean Diff.	Below threshold?	Summary	Adjusted P Value
TDP-43wt - TDP-43KQ/KQ
3	24.58	Yes	*	0.0117
4	23.14	Yes	*	0.0117
5	27.45	Yes	*	0.0117
Test details	Mean 1	Mean 2	Mean Diff.	SE of diff.	N1	N2	t	DF
TDP-43wt - TDP-43KQ/KQ
3	33.26	8.674	24.58	7.705	15	7	3.19	17.69
4	35.66	12.52	23.14	7.669	15	7	3.018	19.99
5	47.56	20.11	27.45	8.415	15	7	3.262	19.9

## Sheet: 4D_18mo Cue
Figure 4D Source Data: Statistical analysis results (18mo old cue-dependent fear conditioning)
Table Analyzed	18m WTvKQ Fear- Cue: Minutes 3-5
Two-way RM ANOVA	Matching: Stacked
Assume sphericity?	No
Alpha	0.05
Source of Variation	% of total variation	P value	P value summary	Significant?	Geisser-Greenhouse's epsilon
Minute x Genotype	2.093	0.2069	ns	No
Minute	0.4739	0.6368	ns	No	0.7685
Genotype	11.37	0.1015	ns	No
Animal	64.5	<0.0001	****	Yes
ANOVA table	SS	DF	MS	F (DFn	DFd)	P value
Minute x Genotype	325.3	2	162.7	F (2	34) = 1.651	P=0.2069
Minute	73.66	2	36.83	F (1.537	26.13) = 0.3738	P=0.6368
Genotype	1768	1	1768	F (1	17) = 2.998	P=0.1015
Animal	10025	17	589.7	F (17	34) = 5.985	P<0.0001
Residual	3350	34	98.53
Difference between column means
Mean of TDP-43wt	30.69
Mean of TDP-43KQ/KQ	19.54
Difference between means	11.15
SE of difference	6.442
95% CI of difference	-2.437 to 24.75
Data summary
Number of columns (Genotype)	2
Number of rows (Minute)	3
Number of subjects (Animal)	19
Number of missing values	0
Multiple Comparisons Testing:
Compare each cell mean with the other cell mean in that row
Number of families	1
Number of comparisons per family	3
Alpha	0.05
Holm-Šídák's multiple comparisons test	Mean Diff.	Below threshold?	Summary	Adjusted P Value
TDP-43wt - TDP-43KQ/KQ
3	17.35	No	ns	0.1791
4	10.41	No	ns	0.2399
5	5.704	No	ns	0.4596
Test details	Mean 1	Mean 2	Mean Diff.	SE of diff.	N1	N2	t	DF
TDP-43wt - TDP-43KQ/KQ
3	34.33	16.98	17.35	8.664	10	9	2.003	14.95
4	28.73	18.33	10.41	6.444	10	9	1.615	14.36
5	29.01	23.31	5.704	7.483	10	9	0.7623	12.85

## Sheet: 4E_18mHid
Figure 4E Source Data: Statistical analysis results (18mo latency to find hidden platform over time)
Table Analyzed	16mo MWM hidden latency
Two-way RM ANOVA	Matching: Stacked
Assume sphericity?	No
Alpha	0.05
Source of Variation	% of total variation	P value	P value summary	Significant?	Geisser-Greenhouse's epsilon
Day x Genotype	1.12	0.7388	ns	No
Day	31.41	<0.0001	****	Yes	0.6797
Genotype	3.209	0.1875	ns	No
Animal	27.09	0.0009	***	Yes
ANOVA table	SS	DF	MS	F (DFn	DFd)	P value
Day x Genotype	198.6	4	49.65	F (4	64) = 0.4958	P=0.7388
Day	5572	4	1393	F (2.719	43.50) = 13.91	P<0.0001
Genotype	569.3	1	569.3	F (1	16) = 1.896	P=0.1875
Animal	4805	16	300.3	F (16	64) = 2.999	P=0.0009
Residual	6408	64	100.1
Difference between column means
Mean of TDP-43wt	19.06
Mean of TDP-43KQ/KQ	24.12
Difference between means	-5.061
SE of difference	3.676
95% CI of difference	-12.85 to 2.732
Data summary
Number of columns (Genotype)	2
Number of rows (Day)	5
Number of subjects (Animal)	18
Number of missing values	0
Multiple Comparisons Testing:
Compare each cell mean with the other cell mean in that row
Number of families	1
Number of comparisons per family	5
Alpha	0.05
Holm-Šídák's multiple comparisons test	Mean Diff.	Below threshold?	Summary	Adjusted P Value
TDP-43wt - TDP-43KQ/KQ
1	-4.12	No	ns	0.9034
2	-0.4633	No	ns	0.9429
3	-4.092	No	ns	0.9034
4	-7.798	No	ns	0.4281
5	-8.833	No	ns	0.4281
Test details	Mean 1	Mean 2	Mean Diff.	SE of diff.	N1	N2	t	DF
TDP-43wt - TDP-43KQ/KQ
1	34.47	38.59	-4.12	7.058	10	8	0.5838	10.4
2	21.76	22.23	-0.4633	6.352	10	8	0.07293	13.6
3	17.09	21.18	-4.092	6.515	10	8	0.628	12.66
4	11.87	19.67	-7.798	4.401	10	8	1.772	8.198
5	10.1	18.93	-8.833	4.859	10	8	1.818	8.196

## Sheet: 4F_18mHid-T
Figure 4F Source Data: Statistical analysis results (18mo latency to find hidden platform cumulative)
Table Analyzed	16mo MWM mean hid aquis time WTvKQ
Column B	TDP-43KQ/KQ
vs.	vs.
Column A	TDP-43wt
Unpaired t test
P value	0.1875
P value summary	ns
Significantly different (P < 0.05)?	No
One- or two-tailed P value?	Two-tailed
t	df	t=1.377	df=16
How big is the difference?
Mean of column A	19.06
Mean of column B	24.12
Difference between means (B - A) ± SEM	5.061 ± 3.676
95% confidence interval	-2.732 to 12.85
R squared (eta squared)	0.1059
F test to compare variances
F	DFn	Dfd	5.254	7	9
P value	0.0248
P value summary	*
Significantly different (P < 0.05)?	Yes
Data analyzed
Sample size	column A	10
Sample size	column B	8

[truncated: 2 more sheets: 4G_18mRevers, 4H_18mRevers-T]
