# Supplementary material for: RNA-binding deficient TDP-43 drives cognitive decline in a mouse model of TDP-43 proteinopathy
Source: eLife. 2023 Oct 11;12:RP85921. doi: 10.7554/eLife.85921 (PMC10567115; doi:10.7554/eLife.85921)
Supplement: Figure 6—figure supplement 1—source data 1. [file elife-85921-fig6-figsupp1-data1.xlsx]

## Sheet: S8B_Hipp_TDP.Sol
Supplementary Figure 8B Source Data: Statistical analysis results (Hippocampus - relative levels of soluble TDP-43 normalized to total transferred protein)
Table Analyzed	Hipp R TDP
Two-way ANOVA	Ordinary
Alpha	0.05
Source of Variation	% of total variation	P value	P value summary	Significant?
Interaction	20.18	0.0799	ns	No
Age	0.05093	0.9044	ns	No
Genotype	21.32	0.0706	ns	No
ANOVA table	SS (Type III)	DF	MS	F (DFn	DFd)	P value
Interaction	0.55	2	0.275	F (2	17) = 2.943	P=0.0799
Age	0.001388	1	0.001388	F (1	17) = 0.01486	P=0.9044
Genotype	0.5811	2	0.2906	F (2	17) = 3.110	P=0.0706
Residual	1.588	17	0.09344
Difference between row means
Predicted (LS) mean of 12	0.993
Predicted (LS) mean of 18	0.9774
Difference between predicted means	0.01563
SE of difference	0.1282
95% CI of difference	-0.2549 to 0.2861
Data summary
Number of columns (Genotype)	3
Number of rows (Age)	2
Number of values	23
Multiple Comparisons Testing:
Within each row	compare columns (simple effects within rows)
Number of families	2
Number of comparisons per family	3
Alpha	0.05
Tukey's multiple comparisons test	Predicted (LS) mean diff.	95.00% CI of diff.	Below threshold?	Summary	Adjusted P Value
12
TDP-43wt vs. TDP-43wt/KQ	0.02544	-0.5735 to 0.6244	No	ns	0.9935
TDP-43wt vs. TDP-43KQ/KQ	-0.004441	-0.5589 to 0.5501	No	ns	0.9998
TDP-43wt/KQ vs. TDP-43KQ/KQ	-0.02988	-0.6288 to 0.5690	No	ns	0.991
18
TDP-43wt vs. TDP-43wt/KQ	-0.2322	-0.7867 to 0.3223	No	ns	0.5421
TDP-43wt vs. TDP-43KQ/KQ	-0.7365	-1.291 to -0.1820	Yes	**	0.0089
TDP-43wt/KQ vs. TDP-43KQ/KQ	-0.5043	-1.059 to 0.05023	No	ns	0.0781
Test details	Predicted (LS) mean 1	Predicted (LS) mean 2	Predicted (LS) mean diff.	SE of diff.	N1	N2	q	DF
12
TDP-43wt vs. TDP-43wt/KQ	1	0.9746	0.02544	0.2335	4	3	0.1541	17
TDP-43wt vs. TDP-43KQ/KQ	1	1.004	-0.004441	0.2161	4	4	0.02906	17
TDP-43wt/KQ vs. TDP-43KQ/KQ	0.9746	1.004	-0.02988	0.2335	3	4	0.181	17
18
TDP-43wt vs. TDP-43wt/KQ	0.6545	0.8867	-0.2322	0.2161	4	4	1.519	17
TDP-43wt vs. TDP-43KQ/KQ	0.6545	1.391	-0.7365	0.2161	4	4	4.819	17
TDP-43wt/KQ vs. TDP-43KQ/KQ	0.8867	1.391	-0.5043	0.2161	4	4	3.299	17

## Sheet: S8C_Hipp_InsolphTDP
Supplementary Figure 8C Source Data: Statistical analysis results (Hippocampus - relative levels of insoluble p(409/410)-TDP-43 protein)
Table Analyzed	Hipp U phTDP AUv WT
Two-way ANOVA	Ordinary
Alpha	0.05
Source of Variation	% of total variation	P value	P value summary	Significant?
Interaction	19.45	<0.0001	****	Yes
Age	10.19	0.0006	***	Yes
Genotype	59.59	<0.0001	****	Yes
ANOVA table	SS	DF	MS	F (DFn	DFd)	P value
Interaction	128	2	64.01	F (2	18) = 16.24	P<0.0001
Age	67.05	1	67.05	F (1	18) = 17.01	P=0.0006
Genotype	392.3	2	196.1	F (2	18) = 49.76	P<0.0001
Residual	70.95	18	3.941
Difference between row means
Mean of 12	3.269
Mean of 18	6.612
Difference between means	-3.343
SE of difference	0.8105
95% CI of difference	-5.046 to -1.640
Data summary
Number of columns (Genotype)	3
Number of rows (Age)	2
Number of values	24
Multiple Comparisons Testing:
Within each row	compare columns (simple effects within rows)
Number of families	2
Number of comparisons per family	3
Alpha	0.05
Tukey's multiple comparisons test	Mean Diff.	95.00% CI of diff.	Below threshold?	Summary	Adjusted P Value
12
TDP-43wt vs. TDP-43wt/KQ	-1.951	-5.533 to 1.632	No	ns	0.3671
TDP-43wt vs. TDP-43KQ/KQ	-4.856	-8.439 to -1.273	Yes	**	0.0075
TDP-43wt/KQ vs. TDP-43KQ/KQ	-2.905	-6.488 to 0.6774	No	ns	0.1246
18
TDP-43wt vs. TDP-43wt/KQ	1.313	-2.270 to 4.896	No	ns	0.6257
TDP-43wt vs. TDP-43KQ/KQ	-12.61	-16.19 to -9.024	Yes	****	<0.0001
TDP-43wt/KQ vs. TDP-43KQ/KQ	-13.92	-17.50 to -10.34	Yes	****	<0.0001
Test details	Mean 1	Mean 2	Mean Diff.	SE of diff.	N1	N2	q	DF
12
TDP-43wt vs. TDP-43wt/KQ	1	2.951	-1.951	1.404	4	4	1.965	18
TDP-43wt vs. TDP-43KQ/KQ	1	5.856	-4.856	1.404	4	4	4.892	18
TDP-43wt/KQ vs. TDP-43KQ/KQ	2.951	5.856	-2.905	1.404	4	4	2.927	18
18
TDP-43wt vs. TDP-43wt/KQ	2.847	1.534	1.313	1.404	4	4	1.323	18
TDP-43wt vs. TDP-43KQ/KQ	2.847	15.45	-12.61	1.404	4	4	12.7	18
TDP-43wt/KQ vs. TDP-43KQ/KQ	1.534	15.45	-13.92	1.404	4	4	14.02	18

## Sheet: S8E_Hipp12m_TDPcyto
Supplementary Figure 8E Source Data: Statistical analysis results (12-month Hippocampus - ratio of cytoplasmic to total TDP-43)
Table Analyzed	178A Hipp TDP cyto/total
Data sets analyzed	A-C
ANOVA summary
F	7.617
P value	0.0116
P value summary	*
Significant diff. among means (P < 0.05)?	Yes
R squared	0.6286
Brown-Forsythe test
F (DFn	DFd)	1.616 (2	9)
P value	0.2513
P value summary	ns
Are SDs significantly different (P < 0.05)?	No
Bartlett's test
Bartlett's statistic (corrected)	10.49
P value	0.0053
P value summary	**
Are SDs significantly different (P < 0.05)?	Yes
ANOVA table	SS	DF	MS	F (DFn	DFd)	P value
Treatment (between columns)	421.4	2	210.7	F (2	9) = 7.617	P=0.0116
Residual (within columns)	248.9	9	27.66
Total	670.3	11
Data summary
Number of treatments (columns)	3
Number of values (total)	12
Multiple Comparisons Testing:
Number of families	1
Number of comparisons per family	3
Alpha	0.05
Tukey's multiple comparisons test	Mean Diff.	95.00% CI of diff.	Below threshold?	Summary	Adjusted P Value
TDP-43wt vs. TDP-43wt/KQ	-7.073	-17.46 to 3.310	No	ns	0.1935	A-B
TDP-43wt vs. TDP-43KQ/KQ	-14.51	-24.90 to -4.131	Yes	**	0.0091	A-C
TDP-43wt/KQ vs. TDP-43KQ/KQ	-7.44	-17.82 to 2.942	No	ns	0.1676	B-C
Test details	Mean 1	Mean 2	Mean Diff.	SE of diff.	n1	n2	q	DF
TDP-43wt vs. TDP-43wt/KQ	2.249	9.322	-7.073	3.719	4	4	2.69	9
TDP-43wt vs. TDP-43KQ/KQ	2.249	16.76	-14.51	3.719	4	4	5.519	9
TDP-43wt/KQ vs. TDP-43KQ/KQ	9.322	16.76	-7.44	3.719	4	4	2.83	9

## Sheet: S8F_Hipp12m_TDP,Sp1
Supplementary Figure 8F Source Data: Statistical analysis results (12-month Hippocampus - ratio of cytoplasmic to total TDP-43, normalized to Sp1)
Table Analyzed	178A Hipp TDP/Sp1 cyto/total
Data sets analyzed	A-C
ANOVA summary
F	12.91
P value	0.0023
P value summary	**
Significant diff. among means (P < 0.05)?	Yes
R squared	0.7416
Brown-Forsythe test
F (DFn	DFd)	1.810 (2	9)
P value	0.2184
P value summary	ns
Are SDs significantly different (P < 0.05)?	No
Bartlett's test
Bartlett's statistic (corrected)	11.75
P value	0.0028
P value summary	**
Are SDs significantly different (P < 0.05)?	Yes
ANOVA table	SS	DF	MS	F (DFn	DFd)	P value
Treatment (between columns)	0.8726	2	0.4363	F (2	9) = 12.91	P=0.0023
Residual (within columns)	0.3041	9	0.03379
Total	1.177	11
Data summary
Number of treatments (columns)	3
Number of values (total)	12
Multiple Comparisons Testing:
Number of families	1
Number of comparisons per family	3
Alpha	0.05
Tukey's multiple comparisons test	Mean Diff.	95.00% CI of diff.	Below threshold?	Summary	Adjusted P Value
TDP-43wt vs. TDP-43wt/KQ	-0.1663	-0.5292 to 0.1965	No	ns	0.4403	A-B
TDP-43wt vs. TDP-43KQ/KQ	-0.6368	-0.9997 to -0.2739	Yes	**	0.0022	A-C
TDP-43wt/KQ vs. TDP-43KQ/KQ	-0.4704	-0.8333 to -0.1076	Yes	*	0.0139	B-C
Test details	Mean 1	Mean 2	Mean Diff.	SE of diff.	n1	n2	q	DF
TDP-43wt vs. TDP-43wt/KQ	0.1472	0.3135	-0.1663	0.13	4	4	1.81	9
TDP-43wt vs. TDP-43KQ/KQ	0.1472	0.7839	-0.6368	0.13	4	4	6.929	9
TDP-43wt/KQ vs. TDP-43KQ/KQ	0.3135	0.7839	-0.4704	0.13	4	4	5.119	9

## Sheet: S8H_Hipp18m_TDPcyto
Supplementary Figure 8H Source Data: Statistical analysis results (18-month Hippocampus - ratio of cytoplasmic to total TDP-43)
Table Analyzed	C Hipp TDP cyto/total
Data sets analyzed	A-C
ANOVA summary
F	37.88
P value	<0.0001
P value summary	****
Significant diff. among means (P < 0.05)?	Yes
R squared	0.8938
Brown-Forsythe test
F (DFn	DFd)	1.165 (2	9)
P value	0.3549
P value summary	ns
Are SDs significantly different (P < 0.05)?	No
Bartlett's test
Bartlett's statistic (corrected)	2.773
P value	0.2499
P value summary	ns
Are SDs significantly different (P < 0.05)?	No
ANOVA table	SS	DF	MS	F (DFn	DFd)	P value
Treatment (between columns)	364.8	2	182.4	F (2	9) = 37.88	P<0.0001
Residual (within columns)	43.34	9	4.815
Total	408.1	11
Data summary
Number of treatments (columns)	3
Number of values (total)	12
Multiple Comparisons Testing:
Number of families	1
Number of comparisons per family	3
Alpha	0.05
Tukey's multiple comparisons test	Mean Diff.	95.00% CI of diff.	Below threshold?	Summary	Adjusted P Value
TDP-43wt vs. TDP-43wt/KQ	-6.23	-10.56 to -1.898	Yes	**	0.0077	A-B
TDP-43wt vs. TDP-43KQ/KQ	-13.49	-17.82 to -9.160	Yes	****	<0.0001	A-C
TDP-43wt/KQ vs. TDP-43KQ/KQ	-7.262	-11.59 to -2.930	Yes	**	0.003	B-C
Test details	Mean 1	Mean 2	Mean Diff.	SE of diff.	n1	n2	q	DF
TDP-43wt vs. TDP-43wt/KQ	5.299	11.53	-6.23	1.552	4	4	5.679	9
TDP-43wt vs. TDP-43KQ/KQ	5.299	18.79	-13.49	1.552	4	4	12.3	9
TDP-43wt/KQ vs. TDP-43KQ/KQ	11.53	18.79	-7.262	1.552	4	4	6.619	9

## Sheet: S8I_Hipp18m_TDP,Sp1
Supplementary Figure 8I Source Data: Statistical analysis results (18-month Hippocampus - ratio of cytoplasmic to total TDP-43, normalized to Sp1)
Table Analyzed	C Hipp TDP/Sp1 cyto/total
Data sets analyzed	A-C
ANOVA summary
F	19.09
P value	0.0006
P value summary	***
Significant diff. among means (P < 0.05)?	Yes
R squared	0.8093
Brown-Forsythe test
F (DFn	DFd)	0.1045 (2	9)
P value	0.9019
P value summary	ns
Are SDs significantly different (P < 0.05)?	No
Bartlett's test
Bartlett's statistic (corrected)	0.1125
P value	0.9453
P value summary	ns
Are SDs significantly different (P < 0.05)?	No
ANOVA table	SS	DF	MS	F (DFn	DFd)	P value
Treatment (between columns)	2.021	2	1.011	F (2	9) = 19.09	P=0.0006
Residual (within columns)	0.4764	9	0.05294
Total	2.498	11
Data summary
Number of treatments (columns)	3
Number of values (total)	12
Multiple Comparisons Testing:
Number of families	1
Number of comparisons per family	3
Alpha	0.05
Tukey's multiple comparisons test	Mean Diff.	95.00% CI of diff.	Below threshold?	Summary	Adjusted P Value
TDP-43wt vs. TDP-43wt/KQ	-0.1261	-0.5803 to 0.3281	No	ns	0.7268	A-B
TDP-43wt vs. TDP-43KQ/KQ	-0.9268	-1.381 to -0.4726	Yes	***	0.0008	A-C
TDP-43wt/KQ vs. TDP-43KQ/KQ	-0.8007	-1.255 to -0.3465	Yes	**	0.0021	B-C
Test details	Mean 1	Mean 2	Mean Diff.	SE of diff.	n1	n2	q	DF
TDP-43wt vs. TDP-43wt/KQ	0.6267	0.7528	-0.1261	0.1627	4	4	1.096	9
TDP-43wt vs. TDP-43KQ/KQ	0.6267	1.554	-0.9268	0.1627	4	4	8.057	9
TDP-43wt/KQ vs. TDP-43KQ/KQ	0.7528	1.554	-0.8007	0.1627	4	4	6.961	9
