# Supplementary material for: RNA-binding deficient TDP-43 drives cognitive decline in a mouse model of TDP-43 proteinopathy
Source: eLife. 2023 Oct 11;12:RP85921. doi: 10.7554/eLife.85921 (PMC10567115; doi:10.7554/eLife.85921)
Supplement: Figure 6—figure supplement 2—source data 1. [file elife-85921-fig6-figsupp2-data1.xlsx]

## Sheet: S9B_CTX_TDP.Sol
Supplemental Figure 9B Source Data: Statistical analysis results (Neocortex - relative levels of soluble TDP-43 normalized to total transferred protein)
Table Analyzed	CTX R TDP
Two-way ANOVA	Ordinary
Alpha	0.05
Source of Variation	% of total variation	P value	P value summary	Significant?
Interaction	9.646	0.1415	ns	No
Age	16.06	0.0148	*	Yes
Genotype	34.54	0.0036	**	Yes
ANOVA table	SS	DF	MS	F (DFn	DFd)	P value
Interaction	19.78	2	9.892	F (2	18) = 2.184	P=0.1415
Age	32.94	1	32.94	F (1	18) = 7.273	P=0.0148
Genotype	70.83	2	35.41	F (2	18) = 7.818	P=0.0036
Residual	81.53	18	4.53
Difference between row means
Mean of 12	1.915
Mean of 18	4.258
Difference between means	-2.343
SE of difference	0.8689
95% CI of difference	-4.169 to -0.5177
Data summary
Number of columns (Genotype)	3
Number of rows (Age)	2
Number of values	24
Multiple Comparisons Testing:
Within each row	compare columns (simple effects within rows)
Number of families	2
Number of comparisons per family	3
Alpha	0.05
Tukey's multiple comparisons test	Mean Diff.	95.00% CI of diff.	Below threshold?	Summary	Adjusted P Value
12
TDP-43wt vs. TDP-43wt/KQ	-0.7031	-4.544 to 3.138	No	ns	0.8874
TDP-43wt vs. TDP-43KQ/KQ	-2.042	-5.883 to 1.799	No	ns	0.3837
TDP-43wt/KQ vs. TDP-43KQ/KQ	-1.339	-5.179 to 2.502	No	ns	0.6536
18
TDP-43wt vs. TDP-43wt/KQ	-0.4133	-4.254 to 3.428	No	ns	0.9594
TDP-43wt vs. TDP-43KQ/KQ	-5.741	-9.581 to -1.900	Yes	**	0.0035
TDP-43wt/KQ vs. TDP-43KQ/KQ	-5.327	-9.168 to -1.486	Yes	**	0.0063
Test details	Mean 1	Mean 2	Mean Diff.	SE of diff.	N1	N2	q	DF
12
TDP-43wt vs. TDP-43wt/KQ	1	1.703	-0.7031	1.505	4	4	0.6607	18
TDP-43wt vs. TDP-43KQ/KQ	1	3.042	-2.042	1.505	4	4	1.919	18
TDP-43wt/KQ vs. TDP-43KQ/KQ	1.703	3.042	-1.339	1.505	4	4	1.258	18
18
TDP-43wt vs. TDP-43wt/KQ	2.207	2.62	-0.4133	1.505	4	4	0.3884	18
TDP-43wt vs. TDP-43KQ/KQ	2.207	7.947	-5.741	1.505	4	4	5.395	18
TDP-43wt/KQ vs. TDP-43KQ/KQ	2.62	7.947	-5.327	1.505	4	4	5.006	18

## Sheet: S9C_CTX_pTDP.Insol
Supplementary Figure 9C Source Data: Statistical analysis results (Neocortex - relative levels of insoluble p(409/410)-TDP-43 protein)
Table Analyzed	CTX U phTDP AU v WT
Two-way ANOVA	Ordinary
Alpha	0.05
Source of Variation	% of total variation	P value	P value summary	Significant?
Interaction	1.621	0.7147	ns	No
Age	0.6501	0.6067	ns	No
Genotype	55.1	0.0006	***	Yes
ANOVA table	SS	DF	MS	F (DFn	DFd)	P value
Interaction	4.802	2	2.401	F (2	18) = 0.3422	P=0.7147
Age	1.926	1	1.926	F (1	18) = 0.2745	P=0.6067
Genotype	163.2	2	81.62	F (2	18) = 11.63	P=0.0006
Residual	126.3	18	7.016
Difference between row means
Mean of 12	2.909
Mean of 18	3.476
Difference between means	-0.5666
SE of difference	1.081
95% CI of difference	-2.838 to 1.705
Data summary
Number of columns (Genotype)	3
Number of rows (Age)	2
Number of values	24
Multiple Comparisons Testing:
Within each row	compare columns (simple effects within rows)
Number of families	2
Number of comparisons per family	3
Alpha	0.05
Tukey's multiple comparisons test	Mean Diff.	95.00% CI of diff.	Below threshold?	Summary	Adjusted P Value
12
TDP-43wt vs. TDP-43wt/KQ	-0.7345	-5.514 to 4.046	No	ns	0.9191
TDP-43wt vs. TDP-43KQ/KQ	-4.992	-9.772 to -0.2123	Yes	*	0.0399
TDP-43wt/KQ vs. TDP-43KQ/KQ	-4.258	-9.038 to 0.5222	No	ns	0.0857
18
TDP-43wt vs. TDP-43wt/KQ	-0.02423	-4.804 to 4.756	No	ns	>0.9999
TDP-43wt vs. TDP-43KQ/KQ	-6.433	-11.21 to -1.653	Yes	**	0.0079
TDP-43wt/KQ vs. TDP-43KQ/KQ	-6.408	-11.19 to -1.628	Yes	**	0.0081
Test details	Mean 1	Mean 2	Mean Diff.	SE of diff.	N1	N2	q	DF
12
TDP-43wt vs. TDP-43wt/KQ	1	1.734	-0.7345	1.873	4	4	0.5546	18
TDP-43wt vs. TDP-43KQ/KQ	1	5.992	-4.992	1.873	4	4	3.77	18
TDP-43wt/KQ vs. TDP-43KQ/KQ	1.734	5.992	-4.258	1.873	4	4	3.215	18
18
TDP-43wt vs. TDP-43wt/KQ	1.323	1.347	-0.02423	1.873	4	4	0.01829	18
TDP-43wt vs. TDP-43KQ/KQ	1.323	7.756	-6.433	1.873	4	4	4.857	18
TDP-43wt/KQ vs. TDP-43KQ/KQ	1.347	7.756	-6.408	1.873	4	4	4.839	18

## Sheet: S9E_Ctx12m_TDPcyto
Supplementary Figure 9E Source Data: Statistical analysis results (12-month Neocortex - ratio of cytoplasmic to total TDP-43)
Table Analyzed	178A CTX TDP cyto/total
Data sets analyzed	A-C
ANOVA summary
F	2.862
P value	0.1091
P value summary	ns
Significant diff. among means (P < 0.05)?	No
R squared	0.3888
Brown-Forsythe test
F (DFn	DFd)	1.773 (2	9)
P value	0.2243
P value summary	ns
Are SDs significantly different (P < 0.05)?	No
Bartlett's test
Bartlett's statistic (corrected)	8.612
P value	0.0135
P value summary	*
Are SDs significantly different (P < 0.05)?	Yes
ANOVA table	SS	DF	MS	F (DFn	DFd)	P value
Treatment (between columns)	464	2	232	F (2	9) = 2.862	P=0.1091
Residual (within columns)	729.5	9	81.06
Total	1194	11
Data summary
Number of treatments (columns)	3
Number of values (total)	12
Multiple Comparisons Testing:
Number of families	1
Number of comparisons per family	3
Alpha	0.05
Tukey's multiple comparisons test	Mean Diff.	95.00% CI of diff.	Below threshold?	Summary	Adjusted P Value
TDP-43wt vs. TDP-43wt/KQ	-11.88	-29.65 to 5.895	No	ns	0.2038	A-B
TDP-43wt vs. TDP-43KQ/KQ	-14.2	-31.97 to 3.579	No	ns	0.1191	A-C
TDP-43wt/KQ vs. TDP-43KQ/KQ	-2.316	-20.09 to 15.46	No	ns	0.9302	B-C
Test details	Mean 1	Mean 2	Mean Diff.	SE of diff.	n1	n2	q	DF
TDP-43wt vs. TDP-43wt/KQ	3.847	15.73	-11.88	6.366	4	4	2.639	9
TDP-43wt vs. TDP-43KQ/KQ	3.847	18.04	-14.2	6.366	4	4	3.153	9
TDP-43wt/KQ vs. TDP-43KQ/KQ	15.73	18.04	-2.316	6.366	4	4	0.5145	9

## Sheet: S9F_Ctx12m_TDP,Sp1
Supplementary Figure 9F Source Data: Statistical analysis results (12-month Neocortex - ratio of cytoplasmic to total TDP-43, normalized to Sp1)
Table Analyzed	178A CTX TDP/Sp1 cyto/total
Data sets analyzed	A-C
ANOVA summary
F	5.892
P value	0.0231
P value summary	*
Significant diff. among means (P < 0.05)?	Yes
R squared	0.567
Brown-Forsythe test
F (DFn	DFd)	0.5594 (2	9)
P value	0.5902
P value summary	ns
Are SDs significantly different (P < 0.05)?	No
Bartlett's test
Bartlett's statistic (corrected)	3.261
P value	0.1959
P value summary	ns
Are SDs significantly different (P < 0.05)?	No
ANOVA table	SS	DF	MS	F (DFn	DFd)	P value
Treatment (between columns)	1.26	2	0.6301	F (2	9) = 5.892	P=0.0231
Residual (within columns)	0.9626	9	0.107
Total	2.223	11
Data summary
Number of treatments (columns)	3
Number of values (total)	12
Multiple Comparisons Testing:
Number of families	1
Number of comparisons per family	3
Alpha	0.05
Tukey's multiple comparisons test	Mean Diff.	95.00% CI of diff.	Below threshold?	Summary	Adjusted P Value
TDP-43wt vs. TDP-43wt/KQ	-0.2252	-0.8709 to 0.4204	No	ns	0.6104	A-B
TDP-43wt vs. TDP-43KQ/KQ	-0.7718	-1.417 to -0.1262	Yes	*	0.0214	A-C
TDP-43wt/KQ vs. TDP-43KQ/KQ	-0.5466	-1.192 to 0.09904	No	ns	0.0971	B-C
Test details	Mean 1	Mean 2	Mean Diff.	SE of diff.	n1	n2	q	DF
TDP-43wt vs. TDP-43wt/KQ	0.4459	0.6711	-0.2252	0.2312	4	4	1.377	9
TDP-43wt vs. TDP-43KQ/KQ	0.4459	1.218	-0.7718	0.2312	4	4	4.72	9
TDP-43wt/KQ vs. TDP-43KQ/KQ	0.6711	1.218	-0.5466	0.2312	4	4	3.343	9

## Sheet: S9H_Ctx128m_TDPcyto
Supplementary Figure 9H Source Data: Statistical analysis results (18-month Neocortex - ratio of cytoplasmic to total TDP-43)
Table Analyzed	B CTX TDP cyto/total
Data sets analyzed	A-C
ANOVA summary
F	18.69
P value	0.0006
P value summary	***
Significant diff. among means (P < 0.05)?	Yes
R squared	0.806
Brown-Forsythe test
F (DFn	DFd)	1.782 (2	9)
P value	0.2229
P value summary	ns
Are SDs significantly different (P < 0.05)?	No
Bartlett's test
Bartlett's statistic (corrected)	5.955
P value	0.0509
P value summary	ns
Are SDs significantly different (P < 0.05)?	No
ANOVA table	SS	DF	MS	F (DFn	DFd)	P value
Treatment (between columns)	296.1	2	148.1	F (2	9) = 18.69	P=0.0006
Residual (within columns)	71.28	9	7.921
Total	367.4	11
Data summary
Number of treatments (columns)	3
Number of values (total)	12
Multiple Comparisons Testing:
Number of families	1
Number of comparisons per family	3
Alpha	0.05
Tukey's multiple comparisons test	Mean Diff.	95.00% CI of diff.	Below threshold?	Summary	Adjusted P Value
TDP-43wt vs. TDP-43wt/KQ	-0.8773	-6.433 to 4.679	No	ns	0.8996	A-B
TDP-43wt vs. TDP-43KQ/KQ	-10.95	-16.51 to -5.393	Yes	***	0.001	A-C
TDP-43wt/KQ vs. TDP-43KQ/KQ	-10.07	-15.63 to -4.516	Yes	**	0.0018	B-C
Test details	Mean 1	Mean 2	Mean Diff.	SE of diff.	n1	n2	q	DF
TDP-43wt vs. TDP-43wt/KQ	9.259	10.14	-0.8773	1.99	4	4	0.6234	9
TDP-43wt vs. TDP-43KQ/KQ	9.259	20.21	-10.95	1.99	4	4	7.781	9
TDP-43wt/KQ vs. TDP-43KQ/KQ	10.14	20.21	-10.07	1.99	4	4	7.158	9

## Sheet: S9I_Ctx128m_TDP,Sp1
Supplementary Figure 9F Source Data: Statistical analysis results (18-month Neocortex - ratio of cytoplasmic to total TDP-43, normalized to Sp1)
Table Analyzed	B CTX TDP/Sp1 cyto/total
Data sets analyzed	A-C
ANOVA summary
F	7.115
P value	0.014
P value summary	*
Significant diff. among means (P < 0.05)?	Yes
R squared	0.6126
Brown-Forsythe test
F (DFn	DFd)	1.234 (2	9)
P value	0.3361
P value summary	ns
Are SDs significantly different (P < 0.05)?	No
Bartlett's test
Bartlett's statistic (corrected)	2.398
P value	0.3016
P value summary	ns
Are SDs significantly different (P < 0.05)?	No
ANOVA table	SS	DF	MS	F (DFn	DFd)	P value
Treatment (between columns)	0.5718	2	0.2859	F (2	9) = 7.115	P=0.0140
Residual (within columns)	0.3617	9	0.04019
Total	0.9335	11
Data summary
	3
Number of values (total)	12
Multiple Comparisons Testing:
Number of families	1
Number of comparisons per family	3
Alpha	0.05
Tukey's multiple comparisons test	Mean Diff.	95.00% CI of diff.	Below threshold?	Summary	Adjusted P Value
TDP-43wt vs. TDP-43wt/KQ	-0.2321	-0.6279 to 0.1637	No	ns	0.2801	A-B
TDP-43wt vs. TDP-43KQ/KQ	-0.5332	-0.9290 to -0.1375	Yes	*	0.0112	A-C
TDP-43wt/KQ vs. TDP-43KQ/KQ	-0.3011	-0.6969 to 0.09464	No	ns	0.1396	B-C
Test details	Mean 1	Mean 2	Mean Diff.	SE of diff.	n1	n2	q	DF
TDP-43wt vs. TDP-43wt/KQ	0.4281	0.6602	-0.2321	0.1417	4	4	2.316	9
TDP-43wt vs. TDP-43KQ/KQ	0.4281	0.9613	-0.5332	0.1417	4	4	5.32	9
TDP-43wt/KQ vs. TDP-43KQ/KQ	0.6602	0.9613	-0.3011	0.1417	4	4	3.004	9
