# Supplementary material for: RNA-binding deficient TDP-43 drives cognitive decline in a mouse model of TDP-43 proteinopathy
Source: eLife. 2023 Oct 11;12:RP85921. doi: 10.7554/eLife.85921 (PMC10567115; doi:10.7554/eLife.85921)
Supplement: Figure 6—figure supplement 3—source data 1. [file elife-85921-fig6-figsupp3-data1.xlsx]

## Sheet: S10B_SC_TDPtotal
Supplementary Figure 10B Source Data: Statistical analysis results (Spinal cord - levels of soluble TDP-43 protein normalized to total transferred protein)
Table Analyzed	A SC TDP/Ponc
Two-way ANOVA	Ordinary
Alpha	0.05
Source of Variation	% of total variation	P value	P value summary	Significant?
Interaction	2.674	0.3813	ns	No
Age	0.8069	0.627	ns	No
Genotype	55.78	0.0012	**	Yes
ANOVA table	SS (Type III)	DF	MS	F (DFn	DFd)	P value
Interaction	0.1063	1	0.1063	F (1	13) = 0.8212	P=0.3813
Age	0.03207	1	0.03207	F (1	13) = 0.2478	P=0.6270
Genotype	2.217	1	2.217	F (1	13) = 17.13	P=0.0012
Residual	1.683	13	0.1294
Difference between column means
Predicted (LS) mean of TDP-43wt	0.9642
Predicted (LS) mean of TDP-43KQ/KQ	1.69
Difference between predicted means	-0.7257
SE of difference	0.1753
95% CI of difference	-1.104 to -0.3469
Difference between row means
Predicted (LS) mean of 12	1.283
Predicted (LS) mean of 18	1.371
Difference between predicted means	-0.08728
SE of difference	0.1753
95% CI of difference	-0.4661 to 0.2915
Interaction CI
Mean diff	A1 - B1	-0.5668
Mean diff	A2 - B2	-0.8845
(A1 -B1) - (A2 - B2)	0.3178
95% CI of difference	-0.4398 to 1.075
(B1 - A1) - (B2 - A2)	-0.3178
95% CI of difference	-1.075 to 0.4398
Data summary
Number of columns (Genotype)	2
Number of rows (Age)	2
Number of values	17
Multiple Comparisons Testing:
Compare each cell mean with the other cell mean in that row
Number of families	1
Number of comparisons per family	2
Alpha	0.05
Šídák's multiple comparisons test	Predicted (LS) mean diff.	95.00% CI of diff.	Below threshold?	Summary	Adjusted P Value
TDP-43wt - TDP-43KQ/KQ
12	-0.5668	-1.176 to 0.04283	No	ns	0.0694
18	-0.8845	-1.527 to -0.2420	Yes	**	0.0082
Test details	Predicted (LS) mean 1	Predicted (LS) mean 2	Predicted (LS) mean diff.	SE of diff.	N1	N2	t	DF
TDP-43wt - TDP-43KQ/KQ
12	1	1.567	-0.5668	0.2413	4	5	2.348	13
18	0.9284	1.813	-0.8845	0.2544	4	4	3.477	13

## Sheet: S10C_SC_pTDP.Insol
Supplementary Figure 10C Source Data: Statistical analysis results (Spinal cord - relative levels of insoluble p(409/410)-TDP-43 protein)
Table Analyzed	A SC phTDP AU v WT
Two-way ANOVA	Ordinary
Alpha	0.05
Source of Variation	% of total variation	P value	P value summary	Significant?
Interaction	11.67	0.028	*	Yes
Age	30.24	0.0016	**	Yes
Genotype	36.77	0.0007	***	Yes
ANOVA table	SS (Type III)	DF	MS	F (DFn	DFd)	P value
Interaction	905.8	1	905.8	F (1	13) = 6.114	P=0.0280
Age	2348	1	2348	F (1	13) = 15.85	P=0.0016
Genotype	2855	1	2855	F (1	13) = 19.27	P=0.0007
Residual	1926	13	148.2
Difference between column means
Predicted (LS) mean of TDP-43wt	5.473
Predicted (LS) mean of TDP-43KQ/KQ	31.51
Difference between predicted means	-26.04
SE of difference	5.932
95% CI of difference	-38.86 to -13.23
Difference between row means
Predicted (LS) mean of 12	6.687
Predicted (LS) mean of 18	30.3
Difference between predicted means	-23.61
SE of difference	5.932
95% CI of difference	-36.43 to -10.80
Interaction CI
Mean diff	A1 - B1	-11.37
Mean diff	A2 - B2	-40.71
(A1 -B1) - (A2 - B2)	29.33
95% CI of difference	3.704 to 54.96
(B1 - A1) - (B2 - A2)	-29.33
95% CI of difference	-54.96 to -3.704
Data summary
Number of columns (Genotype)	2
Number of rows (Age)	2
Number of values	17
Multiple Comparisons Testing:
Compare each cell mean with the other cell mean in that row
Number of families	1
Number of comparisons per family	2
Alpha	0.05
Šídák's multiple comparisons test	Predicted (LS) mean diff.	95.00% CI of diff.	Below threshold?	Summary	Adjusted P Value
TDP-43wt - TDP-43KQ/KQ
12	-11.37	-32.00 to 9.251	No	ns	0.339
18	-40.71	-62.45 to -18.97	Yes	***	0.0008
Test details	Predicted (LS) mean 1	Predicted (LS) mean 2	Predicted (LS) mean diff.	SE of diff.	N1	N2	t	DF
TDP-43wt - TDP-43KQ/KQ
12	1	12.37	-11.37	8.165	4	5	1.393	13
18	9.946	50.65	-40.71	8.607	4	4	4.73	13

## Sheet: S10E_SC_TDPcyto.tot
Supplementary Figure 10E Source Data: Statistical analysis results (18-month spinal cord - ratio of cytoplasmic to total TDP-43)
Table Analyzed	C SC TDP cyto/total
Data sets analyzed	A-C
ANOVA summary
F	12.02
P value	0.0029
P value summary	**
Significant diff. among means (P < 0.05)?	Yes
R squared	0.7276
Brown-Forsythe test
F (DFn	DFd)	0.6060 (2	9)
P value	0.5664
P value summary	ns
Are SDs significantly different (P < 0.05)?	No
Bartlett's test
Bartlett's statistic (corrected)	0.631
P value	0.7294
P value summary	ns
Are SDs significantly different (P < 0.05)?	No
ANOVA table	SS	DF	MS	F (DFn	DFd)	P value
Treatment (between columns)	568.9	2	284.4	F (2	9) = 12.02	P=0.0029
Residual (within columns)	212.9	9	23.66
Total	781.8	11
Data summary
Number of treatments (columns)	3
Number of values (total)	12
Multiple Comparisons Testing:
Number of families	1
Number of comparisons per family	3
Alpha	0.05
Tukey's multiple comparisons test	Mean Diff.	95.00% CI of diff.	Below threshold?	Summary	Adjusted P Value
TDP-43wt vs. TDP-43wt/KQ	-2.254	-11.86 to 7.349	No	ns	0.7941	A-B
TDP-43wt vs. TDP-43KQ/KQ	-15.6	-25.20 to -5.999	Yes	**	0.0036	A-C
TDP-43wt/KQ vs. TDP-43KQ/KQ	-13.35	-22.95 to -3.745	Yes	**	0.0094	B-C
Test details	Mean 1	Mean 2	Mean Diff.	SE of diff.	n1	n2	q	DF
TDP-43wt vs. TDP-43wt/KQ	8.623	10.88	-2.254	3.439	4	4	0.9269	9
TDP-43wt vs. TDP-43KQ/KQ	8.623	24.23	-15.6	3.439	4	4	6.415	9
TDP-43wt/KQ vs. TDP-43KQ/KQ	10.88	24.23	-13.35	3.439	4	4	5.488	9

## Sheet: S10F_SC_TDP.Sp1
Supplementary Figure 10F Source Data: Statistical analysis results (18-month Spinal cord - ratio of cytoplasmic to total TDP-43, normalized to Sp1)
Table Analyzed	C SC TDP/Sp1 cyto/total
Data sets analyzed	A-C
ANOVA summary
F	30.53
P value	<0.0001
P value summary	****
Significant diff. among means (P < 0.05)?	Yes
R squared	0.8716
Brown-Forsythe test
F (DFn	DFd)	2.122 (2	9)
P value	0.1758
P value summary	ns
Are SDs significantly different (P < 0.05)?	No
Bartlett's test
Bartlett's statistic (corrected)	2.353
P value	0.3083
P value summary	ns
Are SDs significantly different (P < 0.05)?	No
ANOVA table	SS	DF	MS	F (DFn	DFd)	P value
Treatment (between columns)	1.21	2	0.6049	F (2	9) = 30.53	P<0.0001
Residual (within columns)	0.1783	9	0.01981
Total	1.388	11
Data summary
Number of treatments (columns)	3
Number of values (total)	12
Multiple Comparisons Testing:
Number of families	1
Number of comparisons per family	3
Alpha	0.05
Tukey's multiple comparisons test	Mean Diff.	95.00% CI of diff.	Below threshold?	Summary	Adjusted P Value
TDP-43wt vs. TDP-43wt/KQ	-0.1904	-0.4683 to 0.08744	No	ns	0.1904	A-B
TDP-43wt vs. TDP-43KQ/KQ	-0.7483	-1.026 to -0.4704	Yes	****	<0.0001	A-C
TDP-43wt/KQ vs. TDP-43KQ/KQ	-0.5578	-0.8357 to -0.2800	Yes	***	0.0009	B-C
Test details	Mean 1	Mean 2	Mean Diff.	SE of diff.	n1	n2	q	DF
TDP-43wt vs. TDP-43wt/KQ	0.4069	0.5974	-0.1904	0.09953	4	4	2.706	9
TDP-43wt vs. TDP-43KQ/KQ	0.4069	1.155	-0.7483	0.09953	4	4	10.63	9
TDP-43wt/KQ vs. TDP-43KQ/KQ	0.5974	1.155	-0.5578	0.09953	4	4	7.927	9
