# Supplementary material for: RNA-binding deficient TDP-43 drives cognitive decline in a mouse model of TDP-43 proteinopathy
Source: eLife. 2023 Oct 11;12:RP85921. doi: 10.7554/eLife.85921 (PMC10567115; doi:10.7554/eLife.85921)
Supplement: Figure 6—source data 1. [file elife-85921-fig6-data1.xlsx]

## Sheet: 6B_CTX_TDP.Sol
Figure 6B Source Data: Statistical analysis results (Neocortex - relative levels of soluble TDP-43 normalized to total transferred protein)
Table Analyzed	C CTX TDP/Ponc
Two-way ANOVA	Ordinary
Alpha	0.05
Source of Variation	% of total variation	P value	P value summary	Significant?
Interaction	3.953	0.021	*	Yes
Age	27.93	<0.0001	****	Yes
Genotype	57.16	<0.0001	****	Yes
ANOVA table	SS (Type III)	DF	MS	F (DFn	DFd)	P value
Interaction	0.7035	1	0.7035	F (1	14) = 6.754	P=0.0210
Age	4.971	1	4.971	F (1	14) = 47.72	P<0.0001
Genotype	10.17	1	10.17	F (1	14) = 97.67	P<0.0001
Residual	1.458	14	0.1042
Difference between column means
Predicted (LS) mean of TDP-43wt	1.33
Predicted (LS) mean of TDP-43KQ/KQ	2.843
Difference between predicted means	-1.513
SE of difference	0.1531
95% CI of difference	-1.841 to -1.185
Difference between row means
Predicted (LS) mean of 12	1.558
Predicted (LS) mean of 18	2.615
Difference between predicted means	-1.058
SE of difference	0.1531
95% CI of difference	-1.386 to -0.7292
Interaction CI
Mean diff	A1 - B1	-1.115
Mean diff	A2 - B2	-1.911
(A1 -B1) - (A2 - B2)	0.7957
95% CI of difference	0.1390 to 1.452
(B1 - A1) - (B2 - A2)	-0.7957
95% CI of difference	-1.452 to -0.1390
Data summary
Number of columns (Genotype)	2
Number of rows (Age)	2
Number of values	18
Multiple Comparisons Testing:
Compare each cell mean with the other cell mean in that row
Number of families	1
Number of comparisons per family	2
Alpha	0.05
Šídák's multiple comparisons test	Predicted (LS) mean diff.	95.00% CI of diff.	Below threshold?	Summary	Adjusted P Value
TDP-43wt - TDP-43KQ/KQ
12	-1.115	-1.657 to -0.5733	Yes	***	0.0003
18	-1.911	-2.453 to -1.369	Yes	****	<0.0001
Test details	Predicted (LS) mean 1	Predicted (LS) mean 2	Predicted (LS) mean diff.	SE of diff.	N1	N2	t	DF
TDP-43wt - TDP-43KQ/KQ
12	1	2.115	-1.115	0.2165	4	5	5.151	14
18	1.66	3.571	-1.911	0.2165	4	5	8.826	14

## Sheet: 6C_CTX_phTDP.Insol
Figure 6C Source Data: Statistical analysis results (Neocortex - levels of insoluble p(409/410)TDP-43 relative to WT)
Table Analyzed	C CTX phoTDP AU v WT
Two-way ANOVA	Ordinary
Alpha	0.05
Source of Variation	% of total variation	P value	P value summary	Significant?
Interaction	0.8168	0.5976	ns	No
Age	6.718	0.1437	ns	No
Genotype	52.65	0.0007	***	Yes
ANOVA table	SS (Type III)	DF	MS	F (DFn	DFd)	P value
Interaction	25.89	1	25.89	F (1	14) = 0.2918	P=0.5976
Age	212.9	1	212.9	F (1	14) = 2.400	P=0.1437
Genotype	1669	1	1669	F (1	14) = 18.81	P=0.0007
Residual	1242	14	88.73
Difference between column means
Predicted (LS) mean of TDP-43wt	3.254
Predicted (LS) mean of TDP-43KQ/KQ	22.63
Difference between predicted means	-19.38
SE of difference	4.468
95% CI of difference	-28.96 to -9.793
Difference between row means
Predicted (LS) mean of 12	9.481
Predicted (LS) mean of 18	16.4
Difference between predicted means	-6.921
SE of difference	4.468
95% CI of difference	-16.50 to 2.662
Interaction CI
Mean diff	A1 - B1	-16.96
Mean diff	A2 - B2	-21.79
(A1 -B1) - (A2 - B2)	4.827
95% CI of difference	-14.34 to 23.99
(B1 - A1) - (B2 - A2)	-4.827
95% CI of difference	-23.99 to 14.34
Data summary
Number of columns (Genotype)	2
Number of rows (Age)	2
Number of values	18
Multiple Comparisons Testing:
Compare each cell mean with the other cell mean in that row
Number of families	1
Number of comparisons per family	2
Alpha	0.05
Šídák's multiple comparisons test	Predicted (LS) mean diff.	95.00% CI of diff.	Below threshold?	Summary	Adjusted P Value
TDP-43wt - TDP-43KQ/KQ
12	-16.96	-32.78 to -1.147	Yes	*	0.0353
18	-21.79	-37.61 to -5.973	Yes	**	0.0078
Test details	Predicted (LS) mean 1	Predicted (LS) mean 2	Predicted (LS) mean diff.	SE of diff.	N1	N2	t	DF
TDP-43wt - TDP-43KQ/KQ
12	1	17.96	-16.96	6.319	4	5	2.684	14
18	5.508	27.3	-21.79	6.319	4	5	3.448	14

## Sheet: 6E_Hipp_TDP.Sol
Figure 6E Source Data: Statistical analysis results (Hippocampus - relative levels of soluble TDP-43 normalized to total transferred protein)
Table Analyzed	B Hipp TDP/Ponc
Two-way ANOVA	Ordinary
Alpha	0.05
Source of Variation	% of total variation	P value	P value summary	Significant?
Interaction	36.07	0.007	**	Yes
Age	6.353	0.2029	ns	No
Genotype	13.07	0.0766	ns	No
ANOVA table	SS (Type III)	DF	MS	F (DFn	DFd)	P value
Interaction	1.759	1	1.759	F (1	13) = 10.21	P=0.0070
Age	0.3097	1	0.3097	F (1	13) = 1.798	P=0.2029
Genotype	0.6373	1	0.6373	F (1	13) = 3.699	P=0.0766
Residual	2.24	13	0.1723
Difference between column means
Predicted (LS) mean of TDP-43wt	0.8125
Predicted (LS) mean of TDP-43KQ/KQ	1.202
Difference between predicted means	-0.389
SE of difference	0.2023
95% CI of difference	-0.8260 to 0.04794
Difference between row means
Predicted (LS) mean of 12	0.8714
Predicted (LS) mean of 18	1.143
Difference between predicted means	-0.2712
SE of difference	0.2023
95% CI of difference	-0.7082 to 0.1658
Interaction CI
Mean diff	A1 - B1	0.2572
Mean diff	A2 - B2	-1.035
(A1 -B1) - (A2 - B2)	1.293
95% CI of difference	0.4186 to 2.167
(B1 - A1) - (B2 - A2)	-1.293
95% CI of difference	-2.167 to -0.4186
Data summary
Number of columns (Genotype)	2
Number of rows (Age)	2
Number of values	17
Multiple Comparisons Testing:
Compare each cell mean with the other cell mean in that row
Number of families	1
Number of comparisons per family	2
Alpha	0.05
Šídák's multiple comparisons test	Predicted (LS) mean diff.	95.00% CI of diff.	Below threshold?	Summary	Adjusted P Value
TDP-43wt - TDP-43KQ/KQ
12	0.2572	-0.4460 to 0.9605	No	ns	0.6061
18	-1.035	-1.777 to -0.2940	Yes	**	0.0074
Test details	Predicted (LS) mean 1	Predicted (LS) mean 2	Predicted (LS) mean diff.	SE of diff.	N1	N2	t	DF
TDP-43wt - TDP-43KQ/KQ
12	1	0.7428	0.2572	0.2784	4	5	0.9239	13
18	0.6249	1.66	-1.035	0.2935	4	4	3.528	13

## Sheet: 6F_Hipp_phTDP.Insol
Figure 6F Source Data: Statistical analysis results (Hippocampus - levels of insoluble p(409/410)TDP-43 relative to WT)
Table Analyzed	B Hipp phTDP AU v WT
Two-way ANOVA	Ordinary
Alpha	0.05
Source of Variation	% of total variation	P value	P value summary	Significant?
Interaction	17.3	0.0082	**	Yes
Age	22.03	0.0038	**	Yes
Genotype	41.17	0.0003	***	Yes
ANOVA table	SS (Type III)	DF	MS	F (DFn	DFd)	P value
Interaction	27.59	1	27.59	F (1	13) = 9.693	P=0.0082
Age	35.13	1	35.13	F (1	13) = 12.34	P=0.0038
Genotype	65.67	1	65.67	F (1	13) = 23.07	P=0.0003
Residual	37	13	2.846
Difference between column means
Predicted (LS) mean of TDP-43wt	1.164
Predicted (LS) mean of TDP-43KQ/KQ	5.114
Difference between predicted means	-3.949
SE of difference	0.8222
95% CI of difference	-5.726 to -2.173
Difference between row means
Predicted (LS) mean of 12	1.695
Predicted (LS) mean of 18	4.583
Difference between predicted means	-2.889
SE of difference	0.8222
95% CI of difference	-4.665 to -1.112
Interaction CI
Mean diff	A1 - B1	-1.389
Mean diff	A2 - B2	-6.509
(A1 -B1) - (A2 - B2)	5.12
95% CI of difference	1.567 to 8.672
(B1 - A1) - (B2 - A2)	-5.12
95% CI of difference	-8.672 to -1.567
Data summary
Number of columns (Genotype)	2
Number of rows (Age)	2
Number of values	17
Multiple Comparisons Testing:
Compare each cell mean with the other cell mean in that row
Number of families	1
Number of comparisons per family	2
Alpha	0.05
Šídák's multiple comparisons test	Predicted (LS) mean diff.	95.00% CI of diff.	Below threshold?	Summary	Adjusted P Value
TDP-43wt - TDP-43KQ/KQ
12	-1.389	-4.248 to 1.469	No	ns	0.4244
18	-6.509	-9.522 to -3.496	Yes	***	0.0002
Test details	Predicted (LS) mean 1	Predicted (LS) mean 2	Predicted (LS) mean diff.	SE of diff.	N1	N2	t	DF
TDP-43wt - TDP-43KQ/KQ
12	1	2.389	-1.389	1.132	4	5	1.228	13
18	1.329	7.838	-6.509	1.193	4	4	5.456	13

## Sheet: 6H_CTXTDP_cyto.total
Figure 5H Source Data: Statistical analysis results (Neocortex - ratio of cytoplasmic to total TDP-43)
Table Analyzed	B CTX TDP cyto/total
Two-way ANOVA	Ordinary
Alpha	0.05
Source of Variation	% of total variation	P value	P value summary	Significant?
Interaction	4.554	0.0909	ns	No
Age	0.0003789	0.9864	ns	No
Genotype	85.58	<0.0001	****	Yes
ANOVA table	SS	DF	MS	F (DFn, DFd)	P value
Interaction	37.69	1	37.69	F (1, 8) = 3.692	P=0.0909
Age	0.003135	1	0.003135	F (1, 8) = 0.0003071	P=0.9864
Genotype	708.2	1	708.2	F (1, 8) = 69.38	P<0.0001
Residual	81.66	8	10.21
Difference between column means
Mean of TDP-43wt	7.714
Mean of TDP-43KQ/KQ	23.08
Difference between means	-15.36
SE of difference	1.845
95% CI of difference	-19.62 to -11.11
Difference between row means
Mean of 12	15.38
Mean of 18	15.41
Difference between means	-0.03233
SE of difference	1.845
95% CI of difference	-4.286 to 4.221
Interaction CI
Mean diff, A1 - B1	-18.91
Mean diff, A2 - B2	-11.82
(A1 -B1) - (A2 - B2)	-7.089
95% CI of difference	-15.60 to 1.419
(B1 - A1) - (B2 - A2)	7.089
95% CI of difference	-1.419 to 15.60
Data summary
Number of columns (Genotype)	2
Number of rows (Age)	2
Number of values	12
Multiple Comparisons Testing:
Compare each cell mean with the other cell mean in that row
Number of families	1
Number of comparisons per family	2
Alpha	0.05
Šídák's multiple comparisons test	Mean Diff.	95.00% CI of diff.	Below threshold?	Summary	Adjusted P Value
TDP-43wt - TDP-43KQ/KQ
12	-18.91	-26.07 to -11.75	Yes	***	0.0002
18	-11.82	-18.98 to -4.664	Yes	**	0.0038
Test details	Mean 1	Mean 2	Mean Diff.	SE of diff.	N1	N2	t	DF
TDP-43wt - TDP-43KQ/KQ
12	5.926	24.83	-18.91	2.609	3	3	7.248	8
18	9.502	21.32	-11.82	2.609	3	3	4.531	8

## Sheet: 6I_CTXTDP_Sp1
Figure 5I Source Data: Statistical analysis results (Neocortex - relative levels of cytoplasmic TDP-43 normalized to Sp1)
Table Analyzed	B CTX TDP/Sp1 cyto/total
Two-way ANOVA	Ordinary
Alpha	0.05
Source of Variation	% of total variation	P value	P value summary	Significant?
Interaction	0.05726	0.8989	ns	No
Age	7.358	0.1755	ns	No
Genotype	65.93	0.0021	**	Yes
ANOVA table	SS	DF	MS	F (DFn, DFd)	P value
Interaction	0.002397	1	0.002397	F (1, 8) = 0.01719	P=0.8989
Age	0.308	1	0.308	F (1, 8) = 2.209	P=0.1755
Genotype	2.76	1	2.76	F (1, 8) = 19.79	P=0.0021
Residual	1.116	8	0.1395
Difference between column means
Mean of TDP-43wt	0.5292
Mean of TDP-43KQ/KQ	1.488
Difference between means	-0.9592
SE of difference	0.2156
95% CI of difference	-1.456 to -0.4620
Difference between row means
Mean of 12	1.169
Mean of 18	0.8485
Difference between means	0.3204
SE of difference	0.2156
95% CI of difference	-0.1767 to 0.8176
Interaction CI
Mean diff, A1 - B1	-0.9874
Mean diff, A2 - B2	-0.9309
(A1 -B1) - (A2 - B2)	-0.05653
95% CI of difference	-1.051 to 0.9378
(B1 - A1) - (B2 - A2)	0.05653
95% CI of difference	-0.9378 to 1.051
Data summary
Number of columns (Genotype)	2
Number of rows (Age)	2
Number of values	12
Multiple Comparisons Testing:
Compare each cell mean with the other cell mean in that row
Number of families	1
Number of comparisons per family	2
Alpha	0.05
Šídák's multiple comparisons test	Mean Diff.	95.00% CI of diff.	Below threshold?	Summary	Adjusted P Value
TDP-43wt - TDP-43KQ/KQ
12	-0.9874	-1.824 to -0.1510	Yes	*	0.0237
18	-0.9309	-1.767 to -0.09447	Yes	*	0.0312
Test details	Mean 1	Mean 2	Mean Diff.	SE of diff.	N1	N2	t	DF
TDP-43wt - TDP-43KQ/KQ
12	0.6752	1.663	-0.9874	0.3049	3	3	3.239	8
18	0.3831	1.314	-0.9309	0.3049	3	3	3.053	8

## Sheet: 6K_HippTDP_cyto.total
Figure 5K Source Data: Statistical analysis results (Hippocampus - ratio of cytoplasmic to total TDP-43)
Table Analyzed	B Hipp TDP cyto/total
Two-way ANOVA	Ordinary
Alpha	0.05
Source of Variation	% of total variation	P value	P value summary	Significant?
Interaction	1.237	0.5508	ns	No
Age	1.799	0.4742	ns	No
Genotype	71.44	0.0015	**	Yes
ANOVA table	SS	DF	MS	F (DFn, DFd)	P value
Interaction	4.8	1	4.8	F (1, 8) = 0.3878	P=0.5508
Age	6.98	1	6.98	F (1, 8) = 0.5639	P=0.4742
Genotype	277.2	1	277.2	F (1, 8) = 22.40	P=0.0015
Residual	99.02	8	12.38
Difference between column means
Mean of TDP-43wt	2.805
Mean of TDP-43KQ/KQ	12.42
Difference between means	-9.613
SE of difference	2.031
95% CI of difference	-14.30 to -4.929
Difference between row means
Mean of 12	6.849
Mean of 18	8.374
Difference between means	-1.525
SE of difference	2.031
95% CI of difference	-6.209 to 3.159
Interaction CI
Mean diff, A1 - B1	-8.348
Mean diff, A2 - B2	-10.88
(A1 -B1) - (A2 - B2)	2.53
95% CI of difference	-6.838 to 11.90
(B1 - A1) - (B2 - A2)	-2.53
95% CI of difference	-11.90 to 6.838
Data summary
Number of columns (Genotype)	2
Number of rows (Age)	2
Number of values	12
Multiple Comparisons Testing:
Compare each cell mean with the other cell mean in that row
Number of families	1
Number of comparisons per family	2
Alpha	0.05
Šídák's multiple comparisons test	Mean Diff.	95.00% CI of diff.	Below threshold?	Summary	Adjusted P Value
TDP-43wt - TDP-43KQ/KQ
12	-8.348	-16.23 to -0.4676	Yes	*	0.039
18	-10.88	-18.76 to -2.997	Yes	*	0.0106
Test details	Mean 1	Mean 2	Mean Diff.	SE of diff.	N1	N2	t	DF
TDP-43wt - TDP-43KQ/KQ
12	2.675	11.02	-8.348	2.873	3	3	2.906	8
18	2.935	13.81	-10.88	2.873	3	3	3.787	8

## Sheet: 6L_HippTDP_Sp1
Figure 5L Source Data: Statistical analysis results (Hippocampus - relative levels of cytoplasmic TDP-43 normalized to Sp1)
Table Analyzed	B Hipp TDP/Sp1 cyto/total
Two-way ANOVA	Ordinary
Alpha	0.05
Source of Variation	% of total variation	P value	P value summary	Significant?
Interaction	5.007	0.1285	ns	No
Age	28.89	0.0036	**	Yes
Genotype	52.16	0.0006	***	Yes
ANOVA table	SS	DF	MS	F (DFn, DFd)	P value
Interaction	0.1434	1	0.1434	F (1, 8) = 2.874	P=0.1285
Age	0.8273	1	0.8273	F (1, 8) = 16.58	P=0.0036
Genotype	1.494	1	1.494	F (1, 8) = 29.94	P=0.0006
Residual	0.3991	8	0.04989
Difference between column means
Mean of TDP-43wt	0.3701
Mean of TDP-43KQ/KQ	1.076
Difference between means	-0.7056
SE of difference	0.129
95% CI of difference	-1.003 to -0.4083
Difference between row means
Mean of 12	0.4603
Mean of 18	0.9855
Difference between means	-0.5251
SE of difference	0.129
95% CI of difference	-0.8225 to -0.2278
Interaction CI
Mean diff, A1 - B1	-0.487
Mean diff, A2 - B2	-0.9243
(A1 -B1) - (A2 - B2)	0.4373
95% CI of difference	-0.1575 to 1.032
(B1 - A1) - (B2 - A2)	-0.4373
95% CI of difference	-1.032 to 0.1575
Data summary
Number of columns (Genotype)	2
Number of rows (Age)	2
Number of values	12
Multiple Comparisons Testing:
Compare each cell mean with the other cell mean in that row
Number of families	1
Number of comparisons per family	2
Alpha	0.05
Šídák's multiple comparisons test	Mean Diff.	95.00% CI of diff.	Below threshold?	Summary	Adjusted P Value
TDP-43wt - TDP-43KQ/KQ
12	-0.487	-0.9873 to 0.01330	No	ns	0.0559
18	-0.9243	-1.425 to -0.4240	Yes	**	0.0019
Test details	Mean 1	Mean 2	Mean Diff.	SE of diff.	N1	N2	t	DF
TDP-43wt - TDP-43KQ/KQ
12	0.2168	0.7038	-0.487	0.1824	3	3	2.67	8
18	0.5233	1.448	-0.9243	0.1824	3	3	5.068	8

## Sheet: 6M_Hipp_Tardbp
Figure 6M Source Data: Statistical analysis results (Hippocampus - Relative expression of total Tardbp mRNA)
Table Analyzed	Identify outliers of Tardbp Hipp:Cleaned data
Two-way ANOVA	Ordinary
Alpha	0.05
Source of Variation	% of total variation	P value	P value summary	Significant?
Interaction	16.96	0.0001	***	Yes
Age	16.57	0.0002	***	Yes
Genotype	53.58	<0.0001	****	Yes
ANOVA table	SS (Type III)	DF	MS	F (DFn	DFd)	P value
Interaction	2.053	1	2.053	F (1	16) = 24.33	P=0.0001
Age	2.005	1	2.005	F (1	16) = 23.76	P=0.0002
Genotype	6.485	1	6.485	F (1	16) = 76.86	P<0.0001
Residual	1.35	16	0.08437
Difference between column means
Predicted (LS) mean of TDP-43wt	1.014
Predicted (LS) mean of TDP-43KQ/KQ	2.164
Difference between predicted means	-1.151
SE of difference	0.1312
95% CI of difference	-1.429 to -0.8724
Difference between row means
Predicted (LS) mean of 12	1.909
Predicted (LS) mean of 18	1.269
Difference between predicted means	0.6398
SE of difference	0.1312
95% CI of difference	0.3616 to 0.9180
Interaction CI
Mean diff	A1 - B1	-1.798
Mean diff	A2 - B2	-0.5033
(A1 -B1) - (A2 - B2)	-1.295
95% CI of difference	-1.851 to -0.7383
(B1 - A1) - (B2 - A2)	1.295
95% CI of difference	0.7383 to 1.851
Data summary
Number of columns (Genotype)	2
Number of rows (Age)	2
Number of values	20
Multiple Comparisons Testing:
Compare each cell mean with the other cell mean in that row
Number of families	1
Number of comparisons per family	2
Alpha	0.05
Šídák's multiple comparisons test	Predicted (LS) mean diff.	95.00% CI of diff.	Below threshold?	Summary	Adjusted P Value
TDP-43wt - TDP-43KQ/KQ
12	-1.798	-2.279 to -1.317	Yes	****	<0.0001
18	-0.5033	-0.9371 to -0.06943	Yes	*	0.0225
Test details	Predicted (LS) mean 1	Predicted (LS) mean 2	Predicted (LS) mean diff.	SE of diff.	N1	N2	t	DF
TDP-43wt - TDP-43KQ/KQ
12	1.01	2.808	-1.798	0.1949	4	5	9.228	16
18	1.017	1.521	-0.5033	0.1759	6	5	2.861	16

## Sheet: 6N_CTX_Tardbp
Figure 6N Source Data: Statistical analysis results (Neocortex - Relative expression of total Tardbp mRNA)
Table Analyzed	Identify outliers of Tardbp CTX:Cleaned data
Two-way ANOVA	Ordinary
Alpha	0.05
Source of Variation	% of total variation	P value	P value summary	Significant?
Interaction	5.769	0.012	*	Yes
Age	12.29	0.0006	***	Yes
Genotype	62.63	<0.0001	****	Yes
ANOVA table	SS (Type III)	DF	MS	F (DFn	DFd)	P value
Interaction	1.164	1	1.164	F (1	23) = 7.437	P=0.0120
Age	2.481	1	2.481	F (1	23) = 15.84	P=0.0006
Genotype	12.64	1	12.64	F (1	23) = 80.74	P<0.0001
Residual	3.601	23	0.1566
Difference between column means
Predicted (LS) mean of TDP-43wt	0.9487
Predicted (LS) mean of TDP-43KQ/KQ	2.409
Difference between predicted means	-1.461
SE of difference	0.1626
95% CI of difference	-1.797 to -1.124
Difference between row means
Predicted (LS) mean of 12	2.002
Predicted (LS) mean of 18	1.355
Difference between predicted means	0.647
SE of difference	0.1626
95% CI of difference	0.3107 to 0.9833
Interaction CI
Mean diff	A1 - B1	-1.904
Mean diff	A2 - B2	-1.017
(A1 -B1) - (A2 - B2)	-0.8866
95% CI of difference	-1.559 to -0.2140
(B1 - A1) - (B2 - A2)	0.8866
95% CI of difference	0.2140 to 1.559
Data summary
Number of columns (Genotype)	2
Number of rows (Age)	2
Number of values	27
Multiple Comparisons Testing:
Compare each cell mean with the other cell mean in that row
Number of families	1
Number of comparisons per family	2
Alpha	0.05
Šídák's multiple comparisons test	Predicted (LS) mean diff.	95.00% CI of diff.	Below threshold?	Summary	Adjusted P Value
TDP-43wt - TDP-43KQ/KQ
12	-1.904	-2.539 to -1.269	Yes	****	<0.0001
18	-1.017	-1.466 to -0.5683	Yes	****	<0.0001
Test details	Predicted (LS) mean 1	Predicted (LS) mean 2	Predicted (LS) mean diff.	SE of diff.	N1	N2	t	DF
TDP-43wt - TDP-43KQ/KQ
12	1.051	2.954	-1.904	0.2655	4	5	7.172	23
18	0.8468	1.864	-1.017	0.1877	10	8	5.42	23
