# Supplementary material for: RNA-binding deficient TDP-43 drives cognitive decline in a mouse model of TDP-43 proteinopathy
Source: eLife. 2023 Oct 11;12:RP85921. doi: 10.7554/eLife.85921 (PMC10567115; doi:10.7554/eLife.85921)
Supplement: Figure 7—figure supplement 1—source data 1. [file elife-85921-fig7-figsupp1-data1.xlsx]

## Sheet: S12A_SC-Tardbp
Supplementary Figure 12A Source Data: Statistical analysis results (Spinal cord - Relative expression of total Tardbp mRNA)
Table Analyzed	Identify outliers of Tardbp:Cleaned data
Two-way ANOVA	Ordinary
Alpha	0.05
Source of Variation	% of total variation	P value	P value summary	Significant?
Interaction	0.4662	0.4693	ns	No
Age	0.5355	0.4384	ns	No
Genotype	59.32	<0.0001	****	Yes
ANOVA table	SS (Type III)	DF	MS	F (DFn	DFd)	P value
Interaction	0.05283	1	0.05283	F (1	24) = 0.5405	P=0.4693
Age	0.06068	1	0.06068	F (1	24) = 0.6209	P=0.4384
Genotype	6.723	1	6.723	F (1	24) = 68.79	P<0.0001
Residual	2.346	24	0.09773
Difference between column means
Predicted (LS) mean of TDP-43wt	1.011
Predicted (LS) mean of TDP-43KQ/KQ	2.096
Difference between predicted means	-1.085
SE of difference	0.1308
95% CI of difference	-1.355 to -0.8147
Difference between row means
Predicted (LS) mean of 12	1.502
Predicted (LS) mean of 18	1.605
Difference between predicted means	-0.1031
SE of difference	0.1308
95% CI of difference	-0.3730 to 0.1669
Interaction CI
Mean diff	A1 - B1	-0.9885
Mean diff	A2 - B2	-1.181
(A1 -B1) - (A2 - B2)	0.1923
95% CI of difference	-0.3475 to 0.7321
(B1 - A1) - (B2 - A2)	-0.1923
95% CI of difference	-0.7321 to 0.3475
Data summary
Number of columns (Genotype)	2
Number of rows (Age)	2
Number of values	28
Multiple Comparisons Testing:
Compare each cell mean with the other cell mean in that row
Number of families	1
Number of comparisons per family	2
Alpha	0.05
Šídák's multiple comparisons test	Predicted (LS) mean diff.	95.00% CI of diff.	Below threshold?	Summary	Adjusted P Value
TDP-43wt - TDP-43KQ/KQ
12	-0.9885	-1.516 to -0.4613	Yes	***	0.0003
18	-1.181	-1.514 to -0.8473	Yes	****	<0.0001
Test details	Predicted (LS) mean 1	Predicted (LS) mean 2	Predicted (LS) mean diff.	SE of diff.	N1	N2	t	DF
TDP-43wt - TDP-43KQ/KQ
12	1.008	1.997	-0.9885	0.2211	4	4	4.472	24
18	1.015	2.196	-1.181	0.1398	10	10	8.446	24

## Sheet: S12B_SC-Sort1ex17b
Supplementary Figure 12B Source Data: Statistical analysis results (Spinal cord - Ratio of Sort1-ex17b to Sort1-WT mRNA expression)
Table Analyzed	Vehonly Sort1ex17b:Sort1WT Plaff
Two-way ANOVA	Ordinary
Alpha	0.05
Source of Variation	% of total variation	P value	P value summary	Significant?
Interaction	3.509	0.3109	ns	No
DIV	3.471	0.3134	ns	No
Genotype	69.03	0.0014	**	Yes
ANOVA table	SS	DF	MS	F (DFn	DFd)	P value
Interaction	18.04	1	18.04	F (1	8) = 1.170	P=0.3109
DIV	17.84	1	17.84	F (1	8) = 1.158	P=0.3134
Genotype	355	1	355	F (1	8) = 23.02	P=0.0014
Residual	123.3	8	15.42
Difference between column means
Mean of TDP-43wt	1.008
Mean of TDP-43KQ/KQ	11.88
Difference between means	-10.88
SE of difference	2.267
95% CI of difference	-16.10 to -5.650
Difference between row means
Mean of DIV14	5.227
Mean of DIV28	7.666
Difference between means	-2.439
SE of difference	2.267
95% CI of difference	-7.666 to 2.789
Interaction CI
Mean diff	A1 - B1	-8.425
Mean diff	A2 - B2	-13.33
(A1 -B1) - (A2 - B2)	4.904
95% CI of difference	-5.550 to 15.36
(B1 - A1) - (B2 - A2)	-4.904
95% CI of difference	-15.36 to 5.550
Data summary
Number of columns (Genotype)	2
Number of rows (DIV)	2
Number of values	12
Multiple Comparisons Testing:
Compare each cell mean with the other cell mean in that row
Number of families	1
Number of comparisons per family	2
Alpha	0.05
Šídák's multiple comparisons test	Predicted (LS) mean diff.	95.00% CI of diff.	Below threshold?	Summary	Adjusted P Value
TDP-43wt - TDP-43KQ/KQ
12	-8.406	-11.64 to -5.172	Yes	****	<0.0001
18	-10.81	-14.30 to -7.313	Yes	****	<0.0001
Test details	Predicted (LS) mean 1	Predicted (LS) mean 2	Predicted (LS) mean diff.	SE of diff.	N1	N2	t	DF
TDP-43wt - TDP-43KQ/KQ
12	1.045	9.451	-8.406	1.359	10	5	6.183	25
18	0.9903	11.8	-10.81	1.468	4	10	7.359	25

## Sheet: S12C_SC-Sort1tot
Supplementary Figure 12C Source Data: Statistical analysis results (Spinal cord - Relative expression of total Sort1 mRNA)
Table Analyzed	Sort1 total SC:Cleaned data
Two-way ANOVA	Ordinary
Alpha	0.05
Source of Variation	% of total variation	P value	P value summary	Significant?
Interaction	0.3283	0.78	ns	No
Age	0.8917	0.6457	ns	No
Genotype	0.001516	0.9848	ns	No
ANOVA table	SS (Type III)	DF	MS	F (DFn	DFd)	P value
Interaction	0.002425	1	0.002425	F (1	24) = 0.07981	P=0.7800
Age	0.006586	1	0.006586	F (1	24) = 0.2168	P=0.6457
Genotype	1.12e-05	1	1.12e-05	F (1	24) = 0.0003686	P=0.9848
Residual	0.7292	24	0.03039
Difference between column means
Predicted (LS) mean of TDP-43wt	1.015
Predicted (LS) mean of TDP-43KQ/KQ	1.014
Difference between predicted means	0.0014
SE of difference	0.07292
95% CI of difference	-0.1491 to 0.1519
Difference between row means
Predicted (LS) mean of 12	0.9978
Predicted (LS) mean of 18	1.032
Difference between predicted means	-0.03395
SE of difference	0.07292
95% CI of difference	-0.1845 to 0.1166
Interaction CI
Mean diff	A1 - B1	0.022
Mean diff	A2 - B2	-0.0192
(A1 -B1) - (A2 - B2)	0.0412
95% CI of difference	-0.2598 to 0.3422
(B1 - A1) - (B2 - A2)	-0.0412
95% CI of difference	-0.3422 to 0.2598
Data summary
Number of columns (Genotype)	2
Number of rows (Age)	2
Number of values	28
Multiple Comparisons Testing:
Compare each cell mean with the other cell mean in that row
Number of families	1
Number of comparisons per family	2
Alpha	0.05
Šídák's multiple comparisons test	Predicted (LS) mean diff.	95.00% CI of diff.	Below threshold?	Summary	Adjusted P Value
TDP-43wt - TDP-43KQ/KQ
12	0.022	-0.2720 to 0.3160	No	ns	0.9804
18	-0.0192	-0.2051 to 0.1667	No	ns	0.963
Test details	Predicted (LS) mean 1	Predicted (LS) mean 2	Predicted (LS) mean diff.	SE of diff.	N1	N2	t	DF
TDP-43wt - TDP-43KQ/KQ
12	1.009	0.9868	0.022	0.1233	4	4	0.1785	24
18	1.022	1.041	-0.0192	0.07796	10	10	0.2463	24
