# Supplementary material for: RNA-binding deficient TDP-43 drives cognitive decline in a mouse model of TDP-43 proteinopathy
Source: eLife. 2023 Oct 11;12:RP85921. doi: 10.7554/eLife.85921 (PMC10567115; doi:10.7554/eLife.85921)
Supplement: Figure 8—source data 1. [file elife-85921-fig8-data1.xlsx]

## Sheet: 8B_CTX_Sort1ex17b
Figure 8B Source Data: Statistical analysis results (Neocortex - ratio of Sort1-ex17b:Sort1-WT mRNA expression)
Table Analyzed	Sort1 ex17b:Sort1-WT ratio CTX:Cleaned data
Two-way ANOVA	Ordinary
Alpha	0.05
Source of Variation	% of total variation	P value	P value summary	Significant?
Interaction	3.711	0.0609	ns	No
Age	3.872	0.0559	ns	No
Genotype	49.29	<0.0001	****	Yes
ANOVA table	SS (Type III)	DF	MS	F (DFn	DFd)	P value
Interaction	35.9	1	35.9	F (1	22) = 3.904	P=0.0609
Age	37.46	1	37.46	F (1	22) = 4.073	P=0.0559
Genotype	476.9	1	476.9	F (1	22) = 51.85	P<0.0001
Residual	202.3	22	9.197
Difference between column means
Predicted (LS) mean of TDP-43wt	0.9575
Predicted (LS) mean of TDP-43KQ/KQ	10.45
Difference between predicted means	-9.491
SE of difference	1.318
95% CI of difference	-12.22 to -6.757
Difference between row means
Predicted (LS) mean of 12	4.373
Predicted (LS) mean of 18	7.033
Difference between predicted means	-2.66
SE of difference	1.318
95% CI of difference	-5.393 to 0.07336
Interaction CI
Mean diff	A1 - B1	-6.887
Mean diff	A2 - B2	-12.09
(A1 -B1) - (A2 - B2)	5.208
95% CI of difference	-0.2585 to 10.68
(B1 - A1) - (B2 - A2)	-5.208
95% CI of difference	-10.68 to 0.2585
Data summary
Number of columns (Genotype)	2
Number of rows (Age)	2
Number of values	26
Multiple Comparisons Testing:
Compare each cell mean with the other cell mean in that row
Number of families	1
Number of comparisons per family	2
Alpha	0.05
Šídák's multiple comparisons test	Predicted (LS) mean diff.	95.00% CI of diff.	Below threshold?	Summary	Adjusted P Value
TDP-43wt - TDP-43KQ/KQ
12	-6.887	-12.20 to -1.572	Yes	*	0.0102
18	-12.09	-15.53 to -8.665	Yes	****	<0.0001
Test details	Predicted (LS) mean 1	Predicted (LS) mean 2	Predicted (LS) mean diff.	SE of diff.	N1	N2	t	DF
TDP-43wt - TDP-43KQ/KQ
12	0.9296	7.816	-6.887	2.215	3	5	3.109	22
18	0.9855	13.08	-12.09	1.43	9	9	8.46	22

## Sheet: 8B_CTX_Sort1Total
Figure 8B Source Data: Statistical analysis results (Neocortex - relative levels of Sort1- total)
Table Analyzed	Sort1 total CTX:Cleaned data
Two-way ANOVA	Ordinary
Alpha	0.05
Source of Variation	% of total variation	P value	P value summary	Significant?
Interaction	8.214	0.1349	ns	No
Age	4.69	0.2541	ns	No
Genotype	0.06387	0.8927	ns	No
ANOVA table	SS (Type III)	DF	MS	F (DFn	DFd)	P value
Interaction	0.4481	1	0.4481	F (1	25) = 2.387	P=0.1349
Age	0.2559	1	0.2559	F (1	25) = 1.363	P=0.2541
Genotype	0.003485	1	0.003485	F (1	25) = 0.01856	P=0.8927
Residual	4.694	25	0.1877
Difference between column means
Predicted (LS) mean of TDP-43wt	1.038
Predicted (LS) mean of TDP-43KQ/KQ	1.061
Difference between predicted means	-0.02383
SE of difference	0.1749
95% CI of difference	-0.3841 to 0.3365
Difference between row means
Predicted (LS) mean of 12	1.152
Predicted (LS) mean of 18	0.9473
Difference between predicted means	0.2042
SE of difference	0.1749
95% CI of difference	-0.1561 to 0.5645
Interaction CI
Mean diff	A1 - B1	-0.2941
Mean diff	A2 - B2	0.2464
(A1 -B1) - (A2 - B2)	-0.5405
95% CI of difference	-1.261 to 0.1801
(B1 - A1) - (B2 - A2)	0.5405
95% CI of difference	-0.1801 to 1.261
Data summary
Number of columns (Genotype)	2
Number of rows (Age)	2
Number of values	29
Multiple Comparisons Testing:
Compare each cell mean with the other cell mean in that row
Number of families	1
Number of comparisons per family	2
Alpha	0.05
Šídák's multiple comparisons test	Predicted (LS) mean diff.	95.00% CI of diff.	Below threshold?	Summary	Adjusted P Value
TDP-43wt - TDP-43KQ/KQ
12	-0.2941	-0.9855 to 0.3973	No	ns	0.5394
18	0.2464	-0.2169 to 0.7097	No	ns	0.3876
Test details	Predicted (LS) mean 1	Predicted (LS) mean 2	Predicted (LS) mean diff.	SE of diff.	N1	N2	t	DF
TDP-43wt - TDP-43KQ/KQ
12	1.005	1.299	-0.2941	0.2907	4	5	1.012	25
18	1.071	0.8241	0.2464	0.1948	11	9	1.265	25

## Sheet: 8C_Hipp_Sort1ex17b
Figure 8C Source Data: Statistical analysis results (Hippocampus - ratio of Sort1-ex17b:Sort1-WT mRNA expression)
Table Analyzed	Sort1 ex17b:Sort1-WT ratio Hipp:Cleaned data
Two-way ANOVA	Ordinary
Alpha	0.05
Source of Variation	% of total variation	P value	P value summary	Significant?
Interaction	0.7472	0.5266	ns	No
Age	1.099	0.4441	ns	No
Genotype	70.05	<0.0001	****	Yes
ANOVA table	SS (Type III)	DF	MS	F (DFn	DFd)	P value
Interaction	2.087	1	2.087	F (1	14) = 0.4217	P=0.5266
Age	3.069	1	3.069	F (1	14) = 0.6203	P=0.4441
Genotype	195.6	1	195.6	F (1	14) = 39.54	P<0.0001
Residual	69.27	14	4.948
Difference between column means
Predicted (LS) mean of TDP-43wt	0.7675
Predicted (LS) mean of TDP-43KQ/KQ	7.524
Difference between predicted means	-6.756
SE of difference	1.074
95% CI of difference	-9.061 to -4.452
Difference between row means
Predicted (LS) mean of 12	4.569
Predicted (LS) mean of 18	3.722
Difference between predicted means	0.8463
SE of difference	1.074
95% CI of difference	-1.458 to 3.151
Interaction CI
Mean diff	A1 - B1	-7.454
Mean diff	A2 - B2	-6.058
(A1 -B1) - (A2 - B2)	-1.396
95% CI of difference	-6.005 to 3.214
(B1 - A1) - (B2 - A2)	1.396
95% CI of difference	-3.214 to 6.005
Data summary
Number of columns (Genotype)	2
Number of rows (Age)	2
Number of values	18
Multiple Comparisons Testing:
Compare each cell mean with the other cell mean in that row
Number of families	1
Number of comparisons per family	2
Alpha	0.05
Šídák's multiple comparisons test	Predicted (LS) mean diff.	95.00% CI of diff.	Below threshold?	Summary	Adjusted P Value
TDP-43wt - TDP-43KQ/KQ
12	-7.454	-11.52 to -3.388	Yes	***	0.0008
18	-6.058	-9.580 to -2.537	Yes	**	0.0014
Test details	Predicted (LS) mean 1	Predicted (LS) mean 2	Predicted (LS) mean diff.	SE of diff.	N1	N2	t	DF
TDP-43wt - TDP-43KQ/KQ
12	0.8417	8.296	-7.454	1.624	3	5	4.589	14
18	0.6932	6.752	-6.058	1.407	5	5	4.306	14

## Sheet: 8C_Hipp_Sort1Total
Figure 8C Source Data: Statistical analysis results (Hippocampus - relative levels of Sort1 total)
Table Analyzed	Sort1 total Hipp:Cleaned data
Two-way ANOVA	Ordinary
Alpha	0.05
Source of Variation	% of total variation	P value	P value summary	Significant?
Interaction	33.62	0.0009	***	Yes
Age	27.66	0.0021	**	Yes
Genotype	4.284	0.1679	ns	No
ANOVA table	SS (Type III)	DF	MS	F (DFn	DFd)	P value
Interaction	0.4394	1	0.4394	F (1	16) = 16.37	P=0.0009
Age	0.3615	1	0.3615	F (1	16) = 13.47	P=0.0021
Genotype	0.05599	1	0.05599	F (1	16) = 2.086	P=0.1679
Residual	0.4294	16	0.02684
Difference between column means
Predicted (LS) mean of TDP-43wt	1.016
Predicted (LS) mean of TDP-43KQ/KQ	0.909
Difference between predicted means	0.1069
SE of difference	0.07402
95% CI of difference	-0.05000 to 0.2638
Difference between row means
Predicted (LS) mean of 12	1.098
Predicted (LS) mean of 18	0.8266
Difference between predicted means	0.2717
SE of difference	0.07402
95% CI of difference	0.1148 to 0.4286
Interaction CI
Mean diff	A1 - B1	-0.1926
Mean diff	A2 - B2	0.4064
(A1 -B1) - (A2 - B2)	-0.599
95% CI of difference	-0.9129 to -0.2852
(B1 - A1) - (B2 - A2)	0.599
95% CI of difference	0.2852 to 0.9129
Data summary
Number of columns (Genotype)	2
Number of rows (Age)	2
Number of values	20
Multiple Comparisons Testing:
Compare each cell mean with the other cell mean in that row
Number of families	1
Number of comparisons per family	2
Alpha	0.05
Šídák's multiple comparisons test	Predicted (LS) mean diff.	95.00% CI of diff.	Below threshold?	Summary	Adjusted P Value
TDP-43wt - TDP-43KQ/KQ
12	-0.1926	-0.4636 to 0.07845	No	ns	0.1878
18	0.4064	0.1618 to 0.6511	Yes	**	0.0017
Test details	Predicted (LS) mean 1	Predicted (LS) mean 2	Predicted (LS) mean diff.	SE of diff.	N1	N2	t	DF
TDP-43wt - TDP-43KQ/KQ
12	1.002	1.195	-0.1926	0.1099	4	5	1.753	16
18	1.03	0.6234	0.4064	0.0992	6	5	4.097	16

## Sheet: 8F_CTXSort1
Figure 8F Source Data: Statistical analysis results (Neocortex - relative levels of soluble SORT1 normalized to total transferred protein)
Table Analyzed	C CTX Sort1/Ponc
Two-way ANOVA	Ordinary
Alpha	0.05
Source of Variation	% of total variation	P value	P value summary	Significant?
Interaction	0.6063	0.7113	ns	No
Age	0.2436	0.8143	ns	No
Genotype	39.56	0.0086	**	Yes
ANOVA table	SS (Type III)	DF	MS	F (DFn	DFd)	P value
Interaction	0.005319	1	0.005319	F (1	14) = 0.1427	P=0.7113
Age	0.002137	1	0.002137	F (1	14) = 0.05731	P=0.8143
Genotype	0.347	1	0.347	F (1	14) = 9.308	P=0.0086
Residual	0.5219	14	0.03728
Difference between column means
Predicted (LS) mean of TDP-43wt	1.006
Predicted (LS) mean of TDP-43KQ/KQ	0.7269
Difference between predicted means	0.2794
SE of difference	0.09159
95% CI of difference	0.08299 to 0.4759
Difference between row means
Predicted (LS) mean of 12	0.8776
Predicted (LS) mean of 18	0.8557
Difference between predicted means	0.02193
SE of difference	0.09159
95% CI of difference	-0.1745 to 0.2184
Interaction CI
Mean diff	A1 - B1	0.2448
Mean diff	A2 - B2	0.314
(A1 -B1) - (A2 - B2)	-0.06919
95% CI of difference	-0.4621 to 0.3237
(B1 - A1) - (B2 - A2)	0.06919
95% CI of difference	-0.3237 to 0.4621
Data summary
Number of columns (Genotype)	2
Number of rows (Age)	2
Number of values	18
Multiple Comparisons Testing:
Compare each cell mean with the other cell mean in that row
Number of families	1
Number of comparisons per family	2
Alpha	0.05
Šídák's multiple comparisons test	Predicted (LS) mean diff.	95.00% CI of diff.	Below threshold?	Summary	Adjusted P Value
TDP-43wt - TDP-43KQ/KQ
12	0.2448	-0.07936 to 0.5690	No	ns	0.1529
18	0.314	-0.01017 to 0.6382	No	ns	0.058
Test details	Predicted (LS) mean 1	Predicted (LS) mean 2	Predicted (LS) mean diff.	SE of diff.	N1	N2	t	DF
TDP-43wt - TDP-43KQ/KQ
12	1	0.7552	0.2448	0.1295	4	5	1.89	14
18	1.013	0.6986	0.314	0.1295	4	5	2.424	14

## Sheet: 8G_HippSort1
Figure 8G Source Data: Statistical analysis results (Hippocampus - relative levels of soluble SORT1 normalized to total transferred protein)
Table Analyzed	C Hipp Sort1/Ponc
Two-way ANOVA	Ordinary
Alpha	0.05
Source of Variation	% of total variation	P value	P value summary	Significant?
Interaction	6.652	0.2443	ns	No
Age	10.03	0.1582	ns	No
Genotype	27.36	0.028	*	Yes
ANOVA table	SS (Type III)	DF	MS	F (DFn	DFd)	P value
Interaction	0.01303	1	0.01303	F (1	13) = 1.487	P=0.2443
Age	0.01964	1	0.01964	F (1	13) = 2.242	P=0.1582
Genotype	0.0536	1	0.0536	F (1	13) = 6.117	P=0.0280
Residual	0.1139	13	0.008763
Difference between column means
Predicted (LS) mean of TDP-43wt	0.9937
Predicted (LS) mean of TDP-43KQ/KQ	0.8808
Difference between predicted means	0.1128
SE of difference	0.04562
95% CI of difference	0.01428 to 0.2114
Difference between row means
Predicted (LS) mean of 12	0.9714
Predicted (LS) mean of 18	0.9031
Difference between predicted means	0.0683
SE of difference	0.04562
95% CI of difference	-0.03025 to 0.1669
Interaction CI
Mean diff	A1 - B1	0.0572
Mean diff	A2 - B2	0.1685
(A1 -B1) - (A2 - B2)	-0.1113
95% CI of difference	-0.3084 to 0.08584
(B1 - A1) - (B2 - A2)	0.1113
95% CI of difference	-0.08584 to 0.3084
Data summary
Number of columns (Genotype)	2
Number of rows (Age)	2
Number of values	17
Multiple Comparisons Testing:
Compare each cell mean with the other cell mean in that row
Number of families	1
Number of comparisons per family	2
Alpha	0.05
Šídák's multiple comparisons test	Predicted (LS) mean diff.	95.00% CI of diff.	Below threshold?	Summary	Adjusted P Value
TDP-43wt - TDP-43KQ/KQ
12	0.0572	-0.1014 to 0.2158	No	ns	0.6143
18	0.1685	0.001271 to 0.3357	Yes	*	0.0482
Test details	Predicted (LS) mean 1	Predicted (LS) mean 2	Predicted (LS) mean diff.	SE of diff.	N1	N2	t	DF
TDP-43wt - TDP-43KQ/KQ
12	1	0.9428	0.0572	0.06279	4	5	0.9108	13
18	0.9873	0.8189	0.1685	0.06619	4	4	2.545	13
