# Supplementary material for: RNA-binding deficient TDP-43 drives cognitive decline in a mouse model of TDP-43 proteinopathy
Source: eLife. 2023 Oct 11;12:RP85921. doi: 10.7554/eLife.85921 (PMC10567115; doi:10.7554/eLife.85921)
Supplement: Supplementary file 2. [file elife-85921-supp2.xlsx]

## Sheet: SFile 2a
Supplementary File 2: Linear Mixed Effects Models - Complete statistical findings
Figure	Treatment group					Confidence intervals	P-value	Overall P-value
Fig1b			Estimate	Std. Error	Confidence Intervals		P-value	Overall P-value
		Intercept	44.254	2.417	40.021	48.4874
		GenotypeTDP43-K145Q vs TDP43-wt	23.392	3.814	16.7119	30.0714	0.00176	0.002259
		GenotypeTDP43-K145R vs TDP43-wt	-2.809	3.412	-8.78569	3.16745	0.44841
Fig1c	Treatment group: NaAsO2		Estimate	Std. Error	Confidence Intervals		P-value	Overall P-value
		Intercept	2.945	0.4324	2.17209	3.71788
		GenotypeTDP43-K145Q vs TDP43-wt	3.6741	0.6116	2.58105	4.76712	0.000958	0.0009585
		GenotypeTDP43-K145R vs TDP43-wt	-0.4571	0.6116	-1.55017	0.635898	0.483029
	Treatment group: Vehicle		Estimate	Std. Error	Confidence Intervals		P-value	Overall P-value
		Intercept	1.43848	0.18362	1.11654	1.76045
		GenotypeTDP43-K145Q vs TDP43-wt	0.64662	0.28996	0.138185	1.15501	0.07657	0.1192
		GenotypeTDP43-K145R vs TDP43-wt	-0.04853	0.25941	-0.503383	0.406287	0.859
	GenotypeTDP43-K145Q		Estimate	Std. Error	Confidence Intervals		P-value
		Intercept	2.0851	0.513	1.12966	3.04054
		TreatmentNaAsO2 vs Vehicle	4.534	0.6623	3.3005	5.76744	0.00638
	GenotypeTDP43-K145R		Estimate	Std. Error	Confidence Intervals		P-value
		Intercept	1.39	0.2521	0.91251	1.86739
		TreatmentNaAsO2 vs Vehicle	1.0979	0.3565	0.422694	1.7731	0.03694
	Genotype TDP43-wt		Estimate	Std. Error	Confidence Intervals		P-value
		Intercept	1.4395	0.3576	0.762422	2.11706
		TreatmentNaAsO2 vs Vehicle	1.5054	0.5055	0.547744	2.46275	0.0408
Fig2b	Treatment group: NaAsO2		Estimate	Std. Error	Confidence Intervals		P-value
		Intercept	1.8642	0.1171	1.63381	2.09461
		GenotypeTDP43-K145Q vs TDP43-wt	1.4362	0.1655	1.11039	1.76206	<0.0001
	Treatment group: Vehicle		Estimate	Std. Error	Confidence Intervals		P-value
		Intercept	0.73127	0.08742	0.571573	0.889947
		GenotypeTDP43-K145Q vs TDP43-wt	0.21341	0.1231	-0.0104537	0.438295	0.2271
	GenotypeTDP43-K145Q		Estimate	Std. Error	Confidence Intervals		P-value
		Intercept	0.9447	0.0988	0.75075	1.1386
		TreatmentNaAsO2 vs Vehicle	2.3558	0.1397	2.08151	2.63001	<0.0001
	Genotype TDP43-wt		Estimate	Std. Error	Confidence Intervals		P-value
		Intercept	0.7321	0.1014	0.547928	0.917204
		TreatmentNaAsO2 vs Vehicle	1.1321	0.1425	0.872345	1.39094	0.0159
Fig2c	Treatment group: NaAsO2		Estimate	Std. Error	Confidence Intervals		P-value
		Intercept	0.60746	0.04571	0.525362	0.689561
		GenotypeTDP43-K145Q vs TDP43-wt	0.09414	0.06465	-0.0219649	0.210247	0.2826
	Treatment group: Vehicle		Estimate	Std. Error	Confidence Intervals		P-value
		Intercept	0.5069	0.1004	0.326521	0.687237
		GenotypeTDP43-K145Q vs TDP43-wt	0.2396	0.1418	-0.0153201	0.494454	0.2328
	GenotypeTDP43-K145Q		Estimate	Std. Error	Confidence Intervals		P-value
		Intercept	0.74645	0.10749	0.553402	0.939489
		TreatmentNaAsO2 vs Vehicle	-0.04484	0.15202	-0.317848	0.228162	0.7958
	Genotype TDP43-wt		Estimate	Std. Error	Confidence Intervals		P-value
		Intercept	0.50626	0.02438	0.456315	0.556685
		TreatmentNaAsO2 vs Vehicle	0.1012	0.03424	0.0303133	0.171601	0.00366
Fig5b			Estimate	Std. Error	Confidence Intervals		P-value
	NeuN cells/mm2 12 months	Intercept	1408.63	51.77	1293.46	1523.8	<0.001
		GenotypeTDP43-K145Q vs TDP43-wt	108.47	72.98	-54.18	271.11	0.168
Fig5b			Estimate	Std. Error	Confidence Intervals		P-value
	NeuN cells/mm2 18 months	Intercept	1366.2	24.35	1297.44	1434.97	<0.001
		GenotypeTDP43-K145Q vs TDP43-wt	55.69	37.02	-41.49	152.87	0.197
Fig5b			Estimate	Std. Error	Confidence Intervals		P-value
	NeuN cells/mm2	Intercept	1408.51	45.86	1310.12	1506.9	<0.001
		Age (12 vs 18 months)	-38.73	73.41	-195.75	118.29	0.606
		GenotypeTDP43-K145Q vs TDP43-wt	92.76	63.51	-42.98	228.5	0.165
		Interaction of Age*Genotype	56.12	89.37	-127.64	239.87	0.536
Fig5c			Estimate	Std. Error	Confidence Intervals		P-value
	%Occupied by NeuN 12 months	Intercept	10.82	0.06	10.69	10.94	<0.001
		GenotypeTDP43-K145Q vs TDP43-wt	0.19	0.08	0.01	0.37	0.038
Fig5c			Estimate	Std. Error	Confidence Intervals		P-value
	%Occupied by NeuN 18 months	Intercept	10.69	0.13	10.25	11.04	<0.001
		GenotypeTDP43-K145Q vs TDP43-wt	0.19	0.2	-0.33	0.71	0.387
Fig5c			Estimate	Std. Error	Confidence Intervals		P-value
	%Occupied by NeuN	Intercept	10.82	0.07	10.66	10.97	<0.001
		Age (12 vs 18 months)	-0.13	0.12	-0.37	0.12	0.295
		GenotypeTDP43-K145Q vs TDP43-wt	0.17	0.1	-0.05	0.38	0.12
		Interaction of Age*Genotype	0.08	0.15	-0.23	0.39	0.605
Fig5e			Estimate	Std. Error	Confidence Intervals		P-value
		Intercept	160.024	4.406	151.608	168.449
		GenotypeTDP43-K145Q vs TDP43-wt	11.701	6.721	-1.15104	24.5452	0.1423
Fig5f			Estimate	Std. Error	Confidence Intervals		P-value
		Intercept	1.13508	0.03653	1.06524	1.20492
		GenotypeTDP43-K145Q vs TDP43-wt	-0.04585	0.05578	-0.152504	0.0607889	0.4485
Fig4h			Estimate	Std. Error	Confidence Intervals		P-value
		Intercept	190.992	16.384	159.632	222.255
		GenotypeTDP43-K145Q vs TDP43-wt	19.289	24.942	-28.3578	67.0343	0.474
Fig4i			Estimate	Std. Error	Confidence Intervals		P-value
		Intercept	1.75647	0.07674	1.60979	1.90317
		GenotypeTDP43-K145Q vs TDP43-wt	0.02498	0.11558	-0.196446	0.24641	0.837
