# Supplementary material for: RNA-binding deficient TDP-43 drives cognitive decline in a mouse model of TDP-43 proteinopathy
Source: eLife. 2023 Oct 11;12:RP85921. doi: 10.7554/eLife.85921 (PMC10567115; doi:10.7554/eLife.85921)
Supplement: Supplementary file 3. [file elife-85921-supp3.xlsx]

## Sheet: S3
Supplementary File 3: Oligonucleotides used in this study
Name	5' to 3' Sequence	Source
Mouse TDP-43 plasmid fwd	GCGACCGGTGCCACCATGGAACAAAAACTCATCTCGGAAGAGG	This study
Mouse TDP-43 plasmid rev	ATAGTCGACCTACATTCCCCAGCCAGAAGACTTAGA	This study
hiPSC sgRNA-Tardbp	TCTTAAGACTGGTCATTCAA	This study
hiPSC Donor Oligonucleotide-K145Q	ACTGTATCATCCTTTCTAGGTCAAGAAAGATCTTAAGACTGGTCATTCACAGGGGTTTGGCTTTGTTCGTTTTACGGAATATGAAACACAAGT	This study
hiPSC Donor Oligonucleotide-K145R	ACTTGTATCATCCTTTCTAGGTCAAGAAAGATCTTAAGACTGGTCATTCAAGAGGGTTTGGCTTTGTTCGTTTTACGGAATATGAAACACAAGT	This study
Ex4Fr	GCCACTGCATCCAGTTGAAA	This study
Ex4Rv	GCATGCACTAAGGGCCAAAG	This study
Tardbp-g79T	gTAAAACTGGTCACTCGAAA	This study
Tardbp-K145Q-T	GATTTGCTATGTGTATGGTCTTAGAAAATTTTTTGTTTTCTTTTTAGGTCAAGAAAGATCTTAAAACTGGTCACTCTCAGGGATTCGGCTTTGTTCGATTTACAGAATATGAAACCCAAGTGAAAGTAATGTCAC	This study
TDPKQ-fwd	CCTTGAACTAACTTGATTACCTTTATGAGC	This study
TDPKQ-rev	TGCTTGCATGGAATGAATTCGG	This study
Mouse Tardbp-F	ATGAGAACGATGAACCCATTGAA	This study, PrimerBankID: 156616305c1
Mouse Tardbp-R	TGAGACACGGGATTCCGGTAG	This study, PrimerBankID: 156616305c1
Mouse s2Sort1_Total fwd	CGTGTTCCCTGGAGGACTTCCT	PMID: 23236149 (Prudencio et al., 2012)
Mouse s2Sort1_Total rev	TTCAGGCTGCTCCACGCACT	PMID: 23236149 (Prudencio et al., 2012)
Mouse s2Sort1_WT fwd	CCCCACAAAGCAGAATTCCAAGTC	PMID: 23236149 (Prudencio et al., 2012)
Mouse s2Sort1_WT rev	TGACAAGCATCAGTCCCACGAT	PMID: 23236149 (Prudencio et al., 2012)
Mouse s2Sort1_ex17 fwd	AAATCCCAGGAGACAAATGC	PMID: 23236149 (Prudencio et al., 2012)
Mouse s2Sort1_ex17 rev	GAGCTGGATTCTGGGACAAG	PMID: 23236149 (Prudencio et al., 2012)
Pgk1 fwd	ATGTCGCTTTCCAACAAGCTG	This study, PrimerBank ID: 6679291a1
Pgk1 rev	GCTCCATTGTCCAAGCAGAAT	This study, PrimerBank ID: 6679291a1
B-Actin fwd	GGCTGTATTCCCCTCCATCG	This study, PrimerBank ID: 6671509a1
B-Actin rev	CCAGTTGGTAACAATGCCATGT	This study, PrimerBank ID: 6671509a1
STMN2 fwd	AGCTGTCCATGCTGTCACTG	PMID: 32790644 (Prudencio et al., 2020)
STMN2 rev	GGTGGCTTCAAGATCAGCTC	PMID: 32790644 (Prudencio et al., 2020)
Truncated STMN2 fwd	GGACTCGGCAGAAGACCTTC	PMID: 32790644 (Prudencio et al., 2020)
truncated STMN2 rev	GCAGGCTGTCTGTCTCTCTC	PMID: 32790644 (Prudencio et al., 2020)
TARDBP fwd	AATTCTGCATGCCCCAGA	PMID: 32790644 (Prudencio et al., 2020)
TARDBP rev	GAAGCATCTGTCTCATCCATTTT	PMID: 32790644 (Prudencio et al., 2020)
RPLP0 fwd	TCTACAACCCTGAAGTGCTTGAT	PMID: 32790644 (Prudencio et al., 2020)
RPLP0 rev	CAATCTGCAGACAGACACTGG	PMID: 32790644 (Prudencio et al., 2020)
UNC13A_CE fwd	TGGATGGAGAGATGGAACCT	PMID: 35197626 (Ma et al., 2022)
UNC13A_CE rev	GGGCTGTCTCATCGTAGTAAAC	PMID: 35197626 (Ma et al., 2022)
UNC13A WT fwd	GGACGTGTGGTACAACCTGG	PMID: 35197626 (Ma et al., 2022)
UNC13A WT rev	GTGTACTGGACATGGTACGGG	PMID: 35197626 (Ma et al., 2022)
