# Supplementary material for: RNA-binding deficient TDP-43 drives cognitive decline in a mouse model of TDP-43 proteinopathy
Source: eLife. 2023 Oct 11;12:RP85921. doi: 10.7554/eLife.85921 (PMC10567115; doi:10.7554/eLife.85921)
Supplement: Supplementary file 4. [file elife-85921-supp4.xlsx]

## Sheet: S4
Supplementary File 4: Antibodies used in this study
Primary antibodies
Antibody target	Manufacturer	Catalog Number	Host species	Dilution	Use	RRID
OCT4	Abcam	Ab19857	rabbit	1:500	IF (hiPSC culture)	AB_445175
Nanog	Abcam	Ab173368	mouse	1:500	IF (hiPSC culture)
SSEA4	Abcam	Ab16287	mouse	1:500	IF (hiPSC culture)	AB_778073
Tra1-60	Abcam	Ab16288	mouse	1:200	IF (hiPSC culture)	AB_778563
SOX1	LifeTech	MA532447	rabbit	1:200	IF (hiPSC culture)	AB_2809724
SOX2	Abcam	Ab97959	rabbit	1:200	IF (hiPSC culture)	AB_2341193
PAX6	LifeTech	426600	rabbit	1:200	IF (hiPSC culture)	AB_2533534
BIII Tubulin	Sigma	T8578	mouse	1:1000	IF (hiPSC culture)	AB_1841228
MAP2	Sigma	M1406	mouse	1:1000	IF (hiPSC culture)	AB_477171
Map2	Abcam	ab5392	chicken	1:5000	IF (primary neuron culture)	AB_2138153
TBR2	Millipore	ab15894	chicken	1:100	IF (hiPSC culture)	AB_10615604
SATB2	Abcam	ab34735	rabbit	1:100	IF (hiPSC culture)	AB_2301417
TDP-43	Millipore	MABN45	mouse	1:500	IF (hiPSC, primary neuron culture)
TDP-43	Cell Signaling Technology	3449	rabbit	1:1000	WB	AB_2200511
TDP-43	Cell Signaling Technology	89789	mouse	1:100	IF (tissue)	AB_2800143
NeuN	Millipore	ABN90P	guinea pig	1:500	IF (primary neuron culture)	AB_2341095
NeuN	Millipore	MAB377A5	mouse	1:75	IF (tissue)	AB_2814948
p(409/410)-TDP-43	ProteinTech	80007-1-RR	rabbit	1:1000	WB	AB_2882937
Sp1	Sigma	07-645	rabbit	1:500	WB	AB_310773
Gapdh	Millipore	MAB374	mouse	1:5000	WB	AB_2107445
SORT1	Cell Signaling Technology	20681	rabbit	1:1000	WB
GFAP (Alexa Fluor 488 conjugated)	Cell Signaling Technology	3655	mouse	1:150	IF (tissue)	AB_2263284
Iba1	WAKO	019-19741	rabbit	1:750	IF (tissue)	AB_839504
Secondary antibodies
Name	Manufacturer	Catalog Number	Host species	Dilution
Anti-mouse IgG HRP	Invitrogen	31432	Goat	1:2000-1:10000	WB	AB_228302
Anti-rabbit IgG HRP	Invitrogen	31462	Goat	1:2000-1:10000	WB	AB_228338
Anti-rabbit IgG AlexaFluor Plus 488	Invitrogen	A32731	Goat	1:500	IF (all)	AB_2633280
Anti-mouse IgG AlexaFluor Plus 488	Invitrogen	A32723	Goat	1:500	IF (hiPSC, primary neuron culture)	AB_2633275
Anti-mouse IgG AlexaFluor Plus 594	Invitrogen	A32742	Goat	1:500	IF (hiPSC, primary neuron culture)	AB_2762825
Anti-chicken IgG AlexaFluor Plus 680	Invitrogen	A32934	Goat	1:500	IF (hiPSC, primary neuron culture)	AB_2762846
Anti-chicken IgG AlexaFluor Plus 594	Invitrogen	A32759	Goat	1:500	IF (hiPSC, primary neuron culture)	AB_2762829
Anti-guinea pig IgG AlexaFluor 647	Invitrogen	A21450	Goat	1:500	IF (hiPSC, primary neuron culture)	AB_2735091
Anti-rabbit IgG AlexaFluor Plus 680	Invitrogen	A32734	Goat	1:1000	IF (tissue)	AB_2633283
